# Supplementary material for: A ghost fence-gap: surprising wildlife usage of an obsolete fence crossing
Source: PeerJ. 2018 Nov 27;6:e5950. doi: 10.7717/peerj.5950 (PMC6266906; doi:10.7717/peerj.5950)
Supplement: Supplemental Information 1 [file peerj-06-5950-s001.xlsx]

## Sheet: All - Before
Date	Month	Year	Species	To Lewa	To Borana	TOTAL BEFORE	B or A
2013-02-01	February					0	B
2013-02-02	February					0	B
2013-02-03	February	2013	Elephant	1	5	6	B
2013-02-04	February	2013	Hyena		4	4	B
2013-02-05	February	2013	Hyena		2	2	B
2013-02-06	February					0	B
2013-02-07	February					0	B
2013-02-08	February					0	B
2013-02-09	February					0	B
2013-02-10	February					0	B
2013-02-11	February					0	B
2013-02-12	February					0	B
2013-02-13	February					0	B
2013-02-14	February					0	B
2013-02-15	February					0	B
2013-02-16	February					0	B
2013-02-17	February	2013	Elephant	3		3	B
2013-02-18	February	2013	Giraffe	2		2	B
2013-02-18	February	2013	Hyena	8	5	13	B
2013-02-19	February	2013	Hyena		1	1	B
2013-02-19	February	2013	Eland		1	1	B
2013-02-19	February	2013	Hyena		1	1	B
2013-02-20	February	2013	Elephant		1	1	B
2013-02-21	February	2013	Elephant		1	1	B
2013-02-21	February	2013	Hyena		2	2	B
2013-02-22	February					0	B
2013-02-23	February	2013	Waterbuck	1	2	3	B
2013-02-23	February	2013	Hyena		4	4	B
2013-02-23	February	2013	Elephant		1	1	B
2013-02-24	February	2013	Hyena		4	4	B
2013-02-24	February	2013	Waterbuck	1	1	2	B
2013-02-25	February	2013	Hyena		1	1	B
2013-02-26	February	2013	Hyena	5		5	B
2013-02-26	February	2013	Elephant		4	4	B
2013-02-27	February	2013	Waterbuck	1	2	3	B
2013-02-28	February	2013	Waterbuck	1		1	B
2013-02-28	February	2013	Elephant	21	13	34	B
2013-02-28	February	2013	Hyena		2	2	B
2013-03-01	March	2013	Elephant	19	20	39	B
2013-03-01	March	2013	Waterbuck	1	1	2	B
2013-03-02	March					0	B
2013-03-03	March	2013	Elephant	2		2	B
2013-03-04	March	2013	Waterbuck	1	1	2	B
2013-03-04	March	2013	Giraffe		1	1	B
2013-03-05	March	2013	Waterbuck	2	2	4	B
2013-03-05	March	2013	Hyena	2		2	B
2013-03-06	March	2013	Waterbuck	1	1	2	B
2013-03-07	March	2013	Waterbuck	1	1	2	B
2013-03-08	March	2013	Waterbuck	1	1	2	B
2013-03-08	March	2013	Elephant		6	6	B
2013-03-08	March	2013	Hyena		1	1	B
2013-03-09	March	2013	Elephant		2	2	B
2013-03-09	March	2013	Warthog	1		1	B
2013-03-09	March	2013	Waterbuck	2	1	3	B
2013-03-10	March	2013	Lion	1		1	B
2013-03-10	March	2013	Elephant		1	1	B
2013-03-10	March	2013	Waterbuck	1		1	B
2013-03-10	March	2013	Hyena	4	4	8	B
2013-03-11	March	2013	Elephant		1	1	B
2013-03-12	March	2013	Waterbuck	2	2	4	B
2013-03-12	March	2013	Elephant	2	2	4	B
2013-03-12	March	2013	Hyena	3		3	B
2013-03-13	March	2013	Waterbuck	1	1	2	B
2013-03-14	March	2013	Elephant	2	2	4	B
2013-03-15	March	2013	Elephant	1		1	B
2013-03-15	March	2013	Waterbuck	2	2	4	B
2013-03-16	March	2013	Hyena	1		1	B
2013-03-16	March	2013	Elephant	3		3	B
2013-03-17	March					0	B
2013-03-18	March					0	B
2013-03-19	March					0	B
2013-03-20	March					0	B
2013-03-21	March					0	B
2013-03-22	March					0	B
2013-03-23	March	2013	Hyena		2	2	B
2013-03-24	March	2013	Hyena	3		3	B
2013-03-25	March					0	B
2013-03-26	March	2013	Waterbuck		1	1	B
2013-03-27	March	2013	Elephant	1		1	B
2013-03-27	March	2013	Waterbuck	1	1	2	B
2013-03-27	March	2013	Hyena		1	1	B
2013-03-28	March	2013	Waterbuck	1		1	B
2013-03-28	March	2013	Hyena		5	5	B
2013-03-28	March	2013	Elephant	1		1	B
2013-03-29	March	2013	Elephant		1	1	B
2013-03-30	March	2013	Hyena		2	2	B
2013-03-30	March	2013	Waterbuck		1	1	B
2013-03-30	March	2013	Elephant	8		8	B
2013-03-31	March	2013	Waterbuck	1		1	B
2013-03-31	March	2013	Hyena	1	7	8	B
2013-04-01	April					0	B
2013-04-02	April					0	B
2013-04-03	April					0	B
2013-04-04	April	2013	Hyena	1	2	3	B
2013-04-05	April					0	B
2013-04-06	April	2013	Giraffe	1		1	B
2013-04-07	April	2013	Giraffe		1	1	B
2013-04-07	April	2013	Waterbuck	2	2	4	B
2013-04-08	April					0	B
2013-04-09	April	2013	Elephant	1		1	B
2013-04-09	April	2013	Hyena		2	2	B
2013-04-10	April	2013	Waterbuck	1	1	2	B
2013-04-11	April	2013	Waterbuck		1	1	B
2013-04-12	April	2013	Waterbuck	1		1	B
2013-04-13	April					0	B
2013-04-14	April	2013	Waterbuck	1	1	2	B
2013-04-15	April	2013	Waterbuck	1	1	2	B
2013-04-16	April	2013	Waterbuck	1	1	2	B
2013-04-16	April	2013	Giraffe	1	1	2	B
2013-04-17	April	2013	Giraffe	1	1	2	B
2013-04-17	April	2013	Hyena		1	1	B
2013-04-18	April	2013	Giraffe	1	1	2	B
2013-04-19	April	2013	Giraffe	1	1	2	B
2013-04-19	April	2013	Hyena	1	3	4	B
2013-04-20	April	2013	Waterbuck	1		1	B
2013-04-20	April	2013	Giraffe	2	2	4	B
2013-04-20	April	2013	Hyena	1		1	B
2013-04-21	April	2013	Giraffe		2	2	B
2013-04-22	April	2013	Wilddog		4	4	B
2013-04-22	April	2013	Eland	1		1	B
2013-04-22	April	2013	Waterbuck		1	1	B
2013-04-23	April	2013	Waterbuck	1		1	B
2013-04-24	April	2013	Lion		1	1	B
2013-04-25	April	2013	Hyena		1	1	B
2013-04-25	April	2013	Eland	1		1	B
2013-04-26	April	2013	Hyena		2	2	B
2013-04-26	April	2013	Elephant		2	2	B
2013-04-27	April	2013	Eland		1	1	B
2013-04-29	April	2013	Eland	1		1	B
2013-04-30	April					0	B
2013-05-01	May					0	B
2013-05-02	May	2013	Giraffe		1	1	B
2013-05-02	May	2013	Waterbuck	1	1	2	B
2013-05-03	May					0	B
2013-05-05	May	2013	Waterbuck	1	1	2	B
2013-05-06	May					0	B
2013-05-07	May					0	B
2013-05-08	May					0	B
2013-05-09	May					0	B
2013-05-10	May					0	B
2013-05-11	May					0	B
2013-05-12	May					0	B
2013-05-13	May					0	B
2013-05-14	May					0	B
2013-05-15	May					0	B
2013-05-16	May					0	B
2013-05-17	May					0	B
2013-05-18	May	2013	Giraffe	1		1	B
2013-05-18	May	2013	Waterbuck	1		1	B
2013-05-19	May	2013	Waterbuck		1	1	B
2013-05-19	May	2013	Elephant	1	1	2	B
2013-05-20	May					0	B
2013-05-21	May					0	B
2013-05-22	May	2013	Wilddog		7	7	B
2013-05-22	May	2013	Waterbuck	1		1	B
2013-05-23	May					0	B
2013-05-24	May	2013	Hyena		3	3	B
2013-05-25	May	2013	Elephant	7	25	32	B
2013-05-26	May	2013	Leopard		1	1	B
2013-05-26	May	2013	Elephant	7	16	23	B
2013-05-27	May	2013	Hyena	3		3	B
2013-05-27	May	2013	Elephant	2	11	13	B
2013-05-27	May	2013	Hyena		1	1	B
2013-05-28	May	2013	Waterbuck	1	1	2	B
2013-05-28	May	2013	Elephant	1	7	8	B
2013-05-28	May	2013	Hyena		1	1	B
2013-05-29	May	2013	Elephant	9	13	22	B
2013-05-30	May	2013	Elephant	3	7	10	B
2013-05-30	May	2013	Waterbuck	1	1	2	B
2013-05-31	May	2013	Elephant	6	6	12	B
2013-05-31	May	2013	Waterbuck	1	1	2	B
2013-06-01	June	2013	Hyena		6	6	B
2013-06-01	June	2013	Elephant	21	1	22	B
2013-06-01	June	2013	Waterbuck	2		2	B
2013-06-01	June	2013	Hyena		1	1	B
2013-06-02	June	2013	Hyena	1	1	2	B
2013-06-02	June	2013	Elephant		1	1	B
2013-06-02	June	2013	Waterbuck	1		1	B
2013-06-03	June	2013	Waterbuck	1		1	B
2013-06-04	June	2013	Waterbuck	3		3	B
2013-06-04	June	2013	Elephant		9	9	B
2013-06-04	June	2013	Hyena		2	2	B
2013-06-05	June	2013	Waterbuck	1		1	B
2013-06-06	June	2013	Hyena	1		1	B
2013-06-06	June	2013	Lion		2	2	B
2013-06-06	June	2013	Elephant		1	1	B
2013-06-07	June	2013	Leopard		1	1	B
2013-06-07	June	2013	Hyena		1	1	B
2013-06-07	June	2013	Elephant	1	1	2	B
2013-06-07	June	2013	Waterbuck	1	1	2	B
2013-06-08	June	2013	Elephant	1		1	B
2013-06-09	June	2013	Hyena	1		1	B
2013-06-10	June	2013	Elephant	1		1	B
2013-06-11	June	2013	Elephant	24	22	46	B
2013-06-12	June					0	B
2013-06-13	June	2013	Duiker	1	1	2	B
2013-06-13	June	2013	Waterbuck	5	3	8	B
2013-06-13	June	2013	Elephant	1	10	11	B
2013-06-14	June	2013	Waterbuck		1	1	B
2013-06-14	June	2013	Eland		1	1	B
2013-06-15	June	2013	Elephant	1		1	B
2013-06-15	June	2013	Waterbuck	1	1	2	B
2013-06-15	June	2013	Eland	1	1	2	B
2013-06-16	June	2013	Waterbuck	1		1	B
2013-06-16	June	2013	Lion		1	1	B
2013-06-17	June					0	B
2013-06-18	June					0	B
2013-06-19	June					0	B
2013-06-20	June					0	B
2013-06-21	June					0	B
2013-06-22	June	2013	Waterbuck	2	1	3	B
2013-06-22	June	2013	eland		1	1	B
2013-06-22	June	2013	Elephant		4	4	B
2013-06-23	June	2013	eland		1	1	B
2013-06-23	June	2013	Elephant	2		2	B
2013-06-23	June	2013	Waterbuck	2		2	B
2013-06-24	June	2013	Hyena	2	2	4	B
2013-06-24	June	2013	Elephant	1	1	2	B
2013-06-24	June	2013	Giraffe	1		1	B
2013-06-25	June	2013	Hyena		2	2	B
2013-06-25	June	2013	Giraffe	2	1	3	B
2013-06-25	June	2013	Elephant	7		7	B
2013-06-26	June	2013	Elephant	1	1	2	B
2013-06-27	June	2013	Elephant		12	12	B
2013-06-28	June	2013	Elephant	3		3	B
2013-06-28	June	2013	Leopard		1	1	B
2013-06-28	June	2013	Hyena		1	1	B
2013-06-28	June	2013	Elephant	1		1	B
2013-06-29	June	2013	Elephant		2	2	B
2013-06-29	June	2013	Hyena	1	2	3	B
2013-06-30	June	2013	Waterbuck		1	1	B
2013-06-30	June	2013	Elephant	1		1	B
2013-07-01	July	2013	Elephant		1	1	B
2013-07-02	July	2013	Giraffe	1		1	B
2013-07-03	July	2013	Elephant		2	2	B
2013-07-03	July	2013	Hyena		1	1	B
2013-07-03	July	2013	Leopard	1		1	B
2013-07-03	July	2013	Waterbuck	1		1	B
2013-07-04	July	2013	Elephant	19	17	36	B
2013-07-04	July	2013	Hyena	1		1	B
2013-07-05	July	2013	Waterbuck	3	3	6	B
2013-07-05	July	2013	Elephant	18	22	40	B
2013-07-06	July	2013	Elephant	4	10	14	B
2013-07-07	July	2013	Elephant	1	11	12	B
2013-07-07	July	2013	Elephant	21		21	B
2013-07-08	July	2013	Elephant	1	19	20	B
2013-07-09	July	2013	Leopard	1		1	B
2013-07-10	July	2013	Elephant	19		19	B
2013-07-11	July	2013	Elephant	20	18	38	B
2013-07-12	July	2013	Elephant		1	1	B
2013-07-13	July	2013	Hyena		1	1	B
2013-07-13	July	2013	Waterbuck	1	1	2	B
2013-07-13	July	2013	Elephant	15	17	32	B
2013-07-14	July					0	B
2013-07-15	July	2013	Hyena		2	2	B
2013-07-16	July	2013	Elephant	1	20	21	B
2013-07-17	July					0	B
2013-07-18	July	2013	Elephant		16	16	B
2013-07-18	July	2013	Hyena		1	1	B
2013-07-19	July	2013	Waterbuck		1	1	B
2013-07-20	July	2013	Waterbuck	1		1	B
2013-07-20	July	2013	eland	1		1	B
2013-07-20	July	2013	Elephant	16		16	B
2013-07-21	July	2013	Giraffe	1		1	B
2013-07-22	July	2013	Elephant		19	19	B
2013-07-22	July	2013	Waterbuck		1	1	B
2013-07-23	July	2013	Eland		1	1	B
2013-07-23	July	2013	Waterbuck	1		1	B
2013-07-23	July	2013	Leopard		1	1	B
2013-07-23	July	2013	Hyena		3	3	B
2013-07-24	July	2013	lion	1	3	4	B
2013-07-24	July	2013	Elephant	22		22	B
2013-07-25	July	2013	Elephant	1	27	28	B
2013-07-26	July	2013	Hyena		1	1	B
2013-07-26	July	2013	Elephant	22		22	B
2013-07-27	July	2013	Waterbuck	1	1	2	B
2013-07-27	July	2013	Elephant		21	21	B
2013-07-28	July	2013	Elephant	11	3	14	B
2013-07-28	July	2013	Elephant		6	6	B
2013-07-29	July					0	B
2013-07-30	July					0	B
2013-07-31	July					0	B
2013-08-01	August					0	B
2013-08-02	August					0	B
2013-08-03	August					0	B
2013-08-04	August	2013	Giraffe		1	1	B
2013-08-04	August	2013	Hyena		2	2	B
2013-08-04	August	2013	Elephant		2	2	B
2013-08-05	August	2013	Elephant	1	1	2	B
2013-08-06	August	2013	Waterbuck		1	1	B
2013-08-06	August	2013	Hyena		2	2	B
2013-08-07	August					0	B
2013-08-08	August					0	B
2013-08-09	August					0	B
2013-08-10	August	2013	Hyena	2	2	4	B
2013-08-11	August	2013	Elephant	4	4	8	B
2013-08-11	August	2013	Hyena		1	1	B
2013-08-12	August	2013	Elephant		4	4	B
2013-08-13	August	2013	Elephant	5	1	6	B
2013-08-13	August	2013	Hyena		1	1	B
2013-08-14	August	2013	Elephant	5	5	10	B
2013-08-14	August	2013	Waterbuck	1	1	2	B
2013-08-15	August	2013	Elephant	4	3	7	B
2013-08-16	August	2013	Elephant	16	16	32	B
2013-08-16	August	2013	Hyena		1	1	B
2013-08-17	August	2013	Waterbuck		1	1	B
2013-08-18	August	2013	Elephant		10	10	B
2013-08-18	August	2013	Waterbuck	2	2	4	B
2013-08-19	August	2013	Waterbuck	3	2	5	B
2013-08-19	August	2013	Hyena	1		1	B
2013-08-19	August	2013	Elephant	2		2	B
2013-08-20	August	2013	Giraffe	1		1	B
2013-08-20	August	2013	Elephant	7		7	B
2013-08-21	August					0	B
2013-08-22	August					0	B
2013-08-23	August	2013	Elephant	10		10	B
2013-08-23	August	2013	Hyena	1		1	B
2013-08-24	August	2013	Elephant	16	10	26	B
2013-08-24	August	2013	Giraffe	1	2	3	B
2013-08-25	August	2013	Elephant	13	14	27	B
2013-08-26	August	2013	Waterbuck	1	1	2	B
2013-08-26	August	2013	Hyena	2	2	4	B
2013-08-27	August	2013	Elephant	12	12	24	B
2013-08-28	August	2013	Hyena		2	2	B
2013-08-29	August	2013	Hyena	1		1	B
2013-08-30	August					0	B
2013-08-31	August	2013	Hyena	1	1	2	B
2013-09-01	September	2013	Elephant		1	1	B
2013-09-02	September	2013	Hyena	1		1	B
2013-09-03	September	2013				0	B
2013-09-04	September	2013	Elephant		1	1	B
2013-09-05	September	2013				0	B
2013-09-06	September	2013				0	B
2013-09-07	September	2013				0	B
2013-09-08	September	2013				0	B
2013-09-09	September	2013	Elephant		5	5	B
2013-09-09	September	2013	Hyena		1	1	B
2013-09-10	September	2013	Hyena		1	1	B
2013-09-10	September	2013	Elephant		6	6	B
2013-09-11	September	2013				0	B
2013-09-12	September	2013				0	B
2013-09-13	September	2013	Giraffe	1		1	B
2013-09-14	September	2013	Elephant	5		5	B
2013-09-14	September	2013	Hyena		1	1	B
2013-09-15	September	2013	Elephant	1		1	B
2013-09-16	September	2013	Elephant		1	1	B
2013-09-17	September	2013	Elephant	14		14	B
2013-09-18	September	2013	Elephant	9	11	20	B
2013-09-19	September	2013	Elephant	2		2	B
2013-09-20	September	2013	Elephant	8		8	B
2013-09-21	September	2013	Elephant		7	7	B
2013-09-22	September	2013	Elephant	1		1	B
2013-09-22	September	2013	Hyena		1	1	B
2013-09-23	September	2013				0	B
2013-09-24	September	2013	Giraffe		1	1	B
2013-09-25	September	2013	Elephant		12	12	B
2013-09-26	September	2013	Elephant		8	8	B
2013-09-26	September	2013	Eland	1		1	B
2013-09-26	September	2013	Hyena		2	2	B
2013-09-27	September	2013	Elephant	1	3	4	B
2013-09-28	September	2013	Elephant		1	1	B
2013-09-28	September	2013	Hyena	4	2	6	B
2013-09-28	September	2013	Elephant	2		2	B
2013-09-29	September	2013	Elephant	8	3	11	B
2013-09-29	September	2013	Waterbuck	3	3	6	B
2013-09-30	September	2013	Waterbuck		1	1	B
2013-09-30	September	2013	Elephant		8	8	B
2013-09-30	September	2013	Hyena		2	2	B
2013-10-01	October	2013	Hyena		2	2	B
2013-10-02	October	2013	Elephant		5	5	B
2013-10-03	October	2013				0	B
2013-10-04	October	2013				0	B
2013-10-05	October	2013				0	B
2013-10-06	October	2013	Elephant	1		1	B
2013-10-07	October	2013	Giraffe	1		1	B
2013-10-07	October	2013	Waterbuck	1	1	2	B
2013-10-08	October	2013	Hyena	2		2	B
2013-10-09	October	2013	Hyena		1	1	B
2013-10-10	October	2013	Giraffe		1	1	B
2013-10-10	October	2013	Hyena		1	1	B
2013-10-11	October	2013	Hyena		1	1	B
2013-10-11	October	2013	Elephant	1		1	B
2013-10-12	October	2013	Eland	1	1	2	B
2013-10-12	October	2013	Bushbuck	1	1	2	B
2013-10-12	October	2013	Elephant	26	1	27	B
2013-10-13	October	2013	Elephant	1		1	B
2013-10-14	October	2013	Elephant	35	11	46	B
2013-10-15	October	2013	Elephant	17	17	34	B
2013-10-16	October	2013	Elephant		21	21	B
2013-10-16	October	2013	Waterbuck	1	1	2	B
2013-10-17	October	2013	Elephant	4		4	B
2013-10-18	October	2013	Hyena	1		1	B
2013-10-18	October	2013	Elephant	5	1	6	B
2013-10-18	October	2013	Eland		1	1	B
2013-10-19	October	2013				0	B
2013-10-20	October	2013	Eland	1		1	B
2013-10-21	October	2013	Elephant	5		5	B
2013-10-22	October	2013				0	B
2013-10-23	October	2013				0	B
2013-10-24	October	2013				0	B
2013-10-25	October	2013				0	B
2013-10-26	October	2013				0	B
2013-10-27	October	2013	Elephant		6	6	B
2013-10-28	October	2013	Elephant		9	9	B
2013-10-29	October	2013				0	B
2013-10-30	October	2013	Eland		1	1	B
2013-10-30	October	2013	Waterbuck	1		1	B
2013-10-30	October	2013	Elephant		2	2	B
2013-10-31	October	2013				0	B
2013-11-01	November	2013	Leopard	1		1	B
2013-11-01	November	2013	Waterbuck	1	1	2	B
2013-11-02	November	2013	Leopard		1	1	B
2013-11-02	November	2013	Elephant	9		9	B
2013-11-03	November	2013	Hyena	1		1	B
2013-11-03	November	2013	Elephant	3	5	8	B
2013-11-04	November	2013	Elephant		3	3	B
2013-11-05	November	2013	Elephant	1		1	B
2013-11-06	November	2013	Waterbuck	2	1	3	B
2013-11-06	November	2013	Lion	1		1	B
2013-11-07	November	2013	Elephant	9		9	B
2013-11-07	November	2013	Hyena		1	1	B
2013-11-08	November	2013				0	B
2013-11-09	November	2013	Eland	1	1	2	B
2013-11-09	November	2013	Leopard		1	1	B
2013-11-10	November	2013	Waterbuck	1	1	2	B
2013-11-11	November	2013	Elephant	7		7	B
2013-11-12	November	2013	Elephant	1	13	14	B
2013-11-13	November	2013	Elephant		3	3	B
2013-11-14	November	2013	Hyena		4	4	B
2013-11-14	November	2013	Elephant	1		1	B
2013-11-15	November	2013	Hyena	4	4	8	B
2013-11-15	November	2013	Giraffe	1		1	B
2013-11-16	November	2013	Hyena	12	14	26	B
2013-11-16	November	2013	Elephant	1		1	B
2013-11-16	November	2013	Wilddog	9		9	B
2013-11-17	November	2013	Waterbuck		1	1	B
2013-11-17	November	2013	Elephant	30		30	B
2013-11-17	November	2013	Eland	1		1	B
2013-11-18	November	2013	Waterbuck	4		4	B
2013-11-19	November	2013				0	B
2013-11-20	November	2013				0	B
2013-11-21	November	2013	Giraffe		1	1	B
2013-11-21	November	2013	Hyena		1	1	B
2013-11-22	November	2013	Hyena		1	1	B
2013-11-22	November	2013	Waterbuck	1		1	B
2013-11-22	November	2013	Elephant	1	1	2	B
2013-11-23	November	2013	Leopard		1	1	B
2013-11-24	November	2013	Giraffe	1		1	B
2013-11-24	November	2013	Elephant	29	29	58	B
2013-11-25	November	2013				0	B
2013-11-26	November	2013	Hyena	1		1	B
2013-11-26	November	2013	Waterbuck		1	1	B
2013-11-27	November	2013				0	B
2013-11-28	November	2013	Waterbuck	1	1	2	B
2013-11-29	November	2013				0	B
2013-11-30	November	2013				0	B
2013-12-01	December	2013				0	B
2013-12-02	December	2013	Elephant	2		2	B
2013-12-03	December	2013	Waterbuck	3	1	4	B
2013-12-04	December	2013	Leopard		1	1	B
2013-12-04	December	2013	Hyena		1	1	B
2013-12-05	December	2013	Waterbuck		1	1	B
2013-12-05	December	2013	Elephant	1		1	B
2013-12-06	December	2013				0	B
2013-12-07	December	2013	Hyena		1	1	B
2013-12-08	December	2013	Waterbuck		2	2	B
2013-12-09	December	2013	Waterbuck	1	1	2	B
2013-12-09	December	2013	Giraffe	1		1	B
2013-12-10	December	2013	Eland	2		2	B
2013-12-10	December	2013	Waterbuck	1		1	B
2013-12-11	December	2013	Giraffe		1	1	B
2013-12-11	December	2013	Hyena		1	1	B
2013-12-12	December	2013	Hyena	2	2	4	B
2013-12-12	December	2013	Elephant	1		1	B
2013-12-13	December	2013	Hyena		1	1	B
2013-12-14	December	2013				0	B
2013-12-15	December	2013				0	B
2013-12-16	December	2013	Waterbuck		1	1	B
2013-12-16	December	2013	Elephant	9		9	B
2013-12-17	December	2013	Lion		2	2	B
2013-12-17	December	2013	Impala	2		2	B
2013-12-17	December	2013	Caracal		1	1	B
2013-12-18	December	2013	Waterbuck	1		1	B
2013-12-18	December	2013	Eland		3	3	B
2013-12-18	December	2013	Elephant		10	10	B
2013-12-18	December	2013	Hyena		2	2	B
2013-12-19	December	2013				0	B
2013-12-20	December	2013				0	B
2013-12-21	December	2013				0	B
2013-12-22	December	2013				0	B
2013-12-23	December	2013				0	B
2013-12-24	December	2013	Giraffe	1		1	B
2013-12-24	December	2013	Elephant	28	29	57	B
2013-12-25	December	2013				0	B
2013-12-26	December	2013	Hyena	1		1	B
2013-12-27	December	2013				0	B
2013-12-28	December	2013	Waterbuck	1	1	2	B
2013-12-29	December	2013				0	B
2013-12-30	December	2013				0	B
2013-12-31	December	2013				0	B
2014-01-01	January	2014				0	B
2014-01-02	January	2014				0	B
2014-01-03	January	2014				0	B
2014-01-04	January	2014				0	B
2014-01-05	January	2014				0	B
2014-01-06	January	2014				0	B
2014-01-07	January	2014				0	B
2014-01-08	January	2014				0	B
2014-01-09	January	2014				0	B
2014-01-10	January	2014				0	B
2014-01-11	January	2014				0	B
2014-01-12	January	2014				0	B
2014-01-13	January	2014				0	B
2014-01-14	January	2014				0	B
2014-01-15	January	2014				0	B
2014-01-16	January	2014				0	B
2014-01-17	January	2014				0	B
2014-01-18	January	2014	Giraffe	1		1	B
2014-01-18	January	2014	Elephant	1		1	B
2014-01-19	January	2014				0	B
2014-01-19	January	2014	Leopard		1	1	B
2014-01-20	January	2014	Elephant	11	1	12	B
2014-01-20	January	2014	Waterbuck	2	2	4	B
2014-01-21	January	2014	Elephant	10	1	11	B
2014-01-21	January	2014	Hyena	1		1	B
2014-01-21	January	2014	Waterbuck		1	1	B
2014-01-22	January	2014	Elephant	1	11	12	B
2014-01-22	January	2014	Waterbuck	1	1	2	B
2014-01-23	January	2014	Waterbuck	1	1	2	B
2014-01-23	January	2014				0	B
2014-01-24	January	2014	Hyena		2	2	B
2014-01-24	January	2014	Waterbuck	1		1	B
2014-01-25	January	2014	Waterbuck		1	1	B
2014-01-25	January	2014	Waterbuck	1		1	B
2014-01-25	January	2014	Elephant	1	18	19	B
2014-01-25	January	2014	Hyena		1	1	B
2014-01-26	January	2014	Hyena		1	1	B
2014-01-27	January	2014	Elephant	1		1	B
2014-01-28	January	2014	Elephant	5	27	32	B
2014-01-29	January	2014	Elephant	1	2	3	B
2014-01-29	January	2014	Waterbuck	1	3	4	B
2014-01-30	January	2014	Waterbuck	1	1	2	B
2014-01-31	January	2014	Waterbuck	2		2	B
2014-02-01	February	2014	Waterbuck	1	1	2	B
2014-02-02	February	2014	Giraffe	1	1	2	B
2014-02-02	February	2014	Elephant		1	1	B
2014-02-03	February	2014				0	B
2014-02-04	February	2014				0	B
2014-02-05	February	2014				0	B
2014-02-06	February	2014				0	B
2014-02-07	February	2014				0	B
2014-02-08	February	2014				0	B
2014-02-09	February	2014				0	B
2014-02-10	February	2014				0	B
2014-02-11	February	2014				0	B
2014-02-12	February	2014				0	B
2014-02-13	February	2014				0	B
2014-02-14	February	2014				0	B
2014-02-15	February	2014				0	B
2014-02-16	February	2014				0	B
2014-02-17	February	2014				0	B
2014-02-18	February	2014				0	B
2014-02-19	February	2014				0	B
2014-02-20	February	2014				0	B
2014-02-21	February	2014				0	B
2014-02-22	February	2014				0	B
2014-02-23	February	2014				0	B
2014-02-24	February	2014				0	B
2014-02-25	February	2014				0	B
2014-02-26	February	2014				0	B
2014-02-27	February	2014				0	B
2014-02-28	February	2014				0	B
2014-03-01	March	2014				0	B
2014-03-02	March	2014				0	B
2014-03-03	March	2014				0	B
2014-03-04	March	2014				0	B
2014-03-05	March	2014				0	B
2014-03-06	March	2014				0	B
2014-03-07	March	2014				0	B
2014-03-08	March	2014				0	B
2014-03-09	March	2014				0	B
2014-03-10	March	2014				0	B
2014-03-11	March	2014				0	B
2014-03-12	March	2014	Giraffe	1		1	B
2014-03-13	March	2014				0	B
2014-03-14	March	2014	Eland	1		1	B
2014-03-15	March	2014	Elephant		21	21	B
2014-03-16	March	2014	Eland		1	1	B
2014-03-16	March	2014	Hyena	1	2	3	B
2014-03-16	March	2014	Waterbuck	1	1	2	B
2014-03-17	March	2014	Elephant	11		11	B
2014-03-18	March	2014				0	B
2014-03-19	March	2014	Hyena	1	2	3	B
2014-03-20	March	2014	Hyena	2	2	4	B
2014-03-21	March	2014	Hyena		1	1	B
2014-03-22	March	2014				0	B
2014-03-23	March	2014	Waterbuck	1	1	2	B
2014-03-24	March	2014	Elephant	10		10	B
2014-03-24	March	2014	Hyena		3	3	B
2014-03-25	March	2014				0	B
2014-03-26	March	2014	Leopard	1		1	B
2014-03-27	March	2014				0	B
2014-03-28	March	2014	Waterbuck	1	1	2	B
2014-03-29	March	2014	Elephant	10		10	B
2014-03-29	March	2014	Giraffe	1		1	B
2014-03-30	March	2014	Elephant	9		9	B
2014-03-31	March	2014	Hyena		1	1	B
2014-03-31	March	2014	Elephant		10	10	B
2014-03-31	March	2014	Giraffe		1	1	B
2014-04-01	April	2014	Hyena		2	2	B
2014-04-01	April	2014	Elephant	7	4	11	B
2014-04-02	April	2014				0	B
2014-04-03	April	2014				0	B
2014-04-04	April	2014				0	B
2014-04-05	April	2014				0	B
2014-04-06	April	2014	Waterbuck	1	1	2	B
2014-04-06	April	2014	Hyena		1	1	B
2014-04-06	April	2014	Giraffe	2		2	B
2014-04-06	April	2014	Elephant	1		1	B
2014-04-07	April	2014	Eland	1		1	B
2014-04-08	April	2014	Giraffe		1	1	B
2014-04-08	April	2014	Elephant	1		1	B
2014-04-09	April	2014	Lion	2		2	B
2014-04-10	April	2014				0	B
2014-04-11	April	2014	Waterbuck		1	1	B
2014-04-11	April	2014	Hyena	2	2	4	B
2014-04-12	April	2014	Waterbuck	1		1	B
2014-04-13	April	2014	Waterbuck	1	1	2	B
2014-04-14	April	2014	Giraffe	1	2	3	B
2014-04-15	April	2014	Waterbuck		1	1	B
2014-04-15	April	2014	Giraffe		1	1	B
2014-04-16	April	2014	Waterbuck	1		1	B
2014-04-16	April	2014	Elephant	1		1	B
2014-04-17	April	2014	Elephant	1	2	3	B
2014-04-18	April	2014	Waterbuck		1	1	B
2014-04-18	April	2014	Giraffe	1		1	B
2014-04-18	April	2014	Elephant	18		18	B
2014-04-19	April	2014	Waterbuck	2	1	3	B
2014-04-19	April	2014	Elephant	5	11	16	B
2014-04-20	April	2014				0	B
2014-04-21	April	2014				0	B
2014-04-22	April	2014				0	B
2014-04-23	April	2014	Elephant		9	9	B
2014-04-24	April	2014	Waterbuck		1	1	B
2014-04-25	April	2014	Waterbuck	1	1	2	B
2014-04-26	April	2014	Waterbuck	1		1	B
2014-04-26	April	2014	Giraffe	1		1	B
2014-04-26	April	2014	Elephant	1	1	2	B
2014-04-27	April	2014	Waterbuck	1	1	2	B
2014-04-28	April	2014				0	B
2014-04-29	April	2014	Waterbuck	1	1	2	B
2014-04-29	April	2014	Elephant	11	1	12	B
2014-04-29	April	2014	Giraffe		1	1	B
2014-04-30	April	2014	Giraffe	1		1	B
2014-05-01	May	2014				0	B
2014-05-02	May	2014	Waterbuck		1	1	B
2014-05-03	May	2014	Waterbuck	1		1	B
2014-05-04	May	2014	Elephant	2	1	3	B
2014-05-04	May	2014	Waterbuck	1		1	B
2014-05-04	May	2014	Lion	1		1	B
2014-05-04	May	2014	Elephant	2		2	B
2014-05-04	May	2014	Lion	1		1	B
2014-05-05	May	2014	Waterbuck	3	1	4	B
2014-05-05	May	2014	Elephant	1		1	B
2014-05-06	May	2014	Hyena		1	1	B
2014-05-06	May	2014	Waterbuck	1	1	2	B
2014-05-07	May	2014	Waterbuck	1		1	B
2014-05-07	May	2014	Giraffe		1	1	B
2014-05-08	May	2014	Hyena	2	2	4	B
2014-05-08	May	2014	Elephant		1	1	B
2014-05-08	May	2014	Giraffe		1	1	B
2014-05-09	May	2014	Hyena		2	2	B
2014-05-10	May	2014	Hyena		1	1	B
2014-05-10	May	2014	Elephant		11	11	B
2014-05-10	May	2014	Lion	1		1	B
2014-05-11	May	2014	Hyena	1		1	B
2014-05-11	May	2014	Elephant		13	13	B
2014-05-12	May	2014	Elephant		14	14	B
2014-05-13	May	2014	Elephant	1	7	8	B
2014-05-13	May	2014	Waterbuck	2	1	3	B
2014-05-14	May	2014	Elephant	2	20	22	B
2014-05-15	May	2014	Elephant		2	2	B
2014-05-15	May	2014	Waterbuck		1	1	B
2014-05-16	May	2014	Waterbuck	1		1	B
2014-05-17	May	2014	Elephant	1		1	B
2014-05-18	May	2014	Elephant		3	3	B
2014-05-19	May	2014	Elephant	4	1	5	B
2014-05-20	May	2014	Hyena		2	2	B
2014-05-20	May	2014	Elephant		17	17	B
2014-05-21	May	2014	Elephant	3	3	6	B
2014-05-22	May	2014	Waterbuck	1	1	2	B
2014-05-22	May	2014	Elephant	16		16	B
2014-05-23	May	2014	Waterbuck	3	2	5	B
2014-05-23	May	2014	Elephant	1		1	B
2014-05-24	May	2014	Elephant	15	27	42	B
2014-05-24	May	2014	Waterbuck	1		1	B
2014-05-25	May	2014	Elephant	1	43	44	B
2014-05-25	May	2014	Waterbuck	1		1	B
2014-05-26	May	2014	Elephant	11	14	25	B
2014-05-26	May	2014	Waterbuck	1		1	B
2014-05-27	May	2014	Elephant	30	35	65	B
2014-05-28	May	2014	Elephant	16	17	33	B
2014-05-29	May	2014	Elephant	1		1	B
2014-05-29	May	2014	Waterbuck	1		1	B
2014-05-30	May	2014	Elephant	12	22	34	B
2014-05-31	May	2014	Elephant	10	12	22	B
2014-06-01	June	2014	Elephant	17	20	37	B
2014-06-01	June	2014	Giraffe	1		1	B
2014-06-02	June	2014	Elephant		14	14	B
2014-06-02	June	2014	Waterbuck	1		1	B
2014-06-03	June	2014	Hyena	3	3	6	B
2014-06-03	June	2014	Elephant	1	4	5	B
2014-06-04	June	2014	Giraffe	1	1	2	B
2014-06-04	June	2014	Elephant	5	6	11	B
2014-06-05	June	2014	Elephant	6		6	B
2014-06-05	June	2014	Giraffe		2	2	B
2014-06-05	June	2014	Hyena		4	4	B
2014-06-06	June	2014	Elephant	4	1	5	B
2014-06-06	June	2014	Giraffe		1	1	B
2014-06-06	June	2014	Hyena	1	2	3	B
2014-06-07	June	2014	Giraffe	3		3	B
2014-06-07	June	2014	Hyena	5	1	6	B
2014-06-07	June	2014	Jackal		2	2	B
2014-06-08	June	2014				0	B
2014-06-09	June	2014				0	B
2014-06-10	June	2014				0	B
2014-06-11	June	2014				0	B
2014-06-12	June	2014				0	B
2014-06-13	June	2014				0	B
2014-06-14	June	2014	Waterbuck		1	1	B
2014-06-15	June	2014	Elephant	1	1	2	B
2014-06-15	June	2014	Waterbuck	1	1	2	B
2014-06-16	June	2014	Waterbuck	1		1	B
2014-06-16	June	2014	Hyena		1	1	B
2014-06-16	June	2014	Giraffe	1		1	B
2014-06-16	June	2014	Elephant	2	1	3	B
2014-06-17	June	2014	Lion		1	1	B
2014-06-17	June	2014	Waterbuck	1	1	2	B
2014-06-18	June	2014	Waterbuck	1		1	B
2014-06-19	June	2014	Elephant		1	1	B
2014-06-19	June	2014	Waterbuck	1	1	2	B
2014-06-19	June	2014	Hyena	1		1	B
2014-06-20	June	2014	Waterbuck		1	1	B
2014-06-20	June	2014	Hyena		1	1	B
2014-06-21	June	2014	Hyena	1	3	4	B
2014-06-21	June	2014	Waterbuck	2		2	B
2014-06-21	June	2014	Elephant		12	12	B
2014-06-22	June	2014	Hyena	1		1	B
2014-06-23	June	2014	Elephant	17	7	24	B
2014-06-23	June	2014	Waterbuck	1	1	2	B
2014-06-24	June	2014	Waterbuck	2	2	4	B
2014-06-24	June	2014	Elephant	17		17	B
2014-06-25	June	2014	Hyena	2		2	B
2014-06-25	June	2014	Waterbuck	1		1	B
2014-06-26	June	2014	Hyena		1	1	B
2014-06-27	June	2014	Waterbuck	3	2	5	B
2014-06-27	June	2014	Giraffe	1	2	3	B
2014-06-28	June	2014	Hyena		1	1	B
2014-06-29	June	2014	Hyena	1	5	6	B
2014-06-29	June	2014	Waterbuck		1	1	B
2014-06-29	June	2014	Hyena	1		1	B
2014-06-30	June	2014	Hyena	4		4	B
2014-06-30	June	2014	Waterbuck	2	1	3	B
2014-06-30	June	2014	Giraffe	1		1	B
2014-07-01	July	2014	Waterbuck		1	1	B
2014-07-01	July	2014	Hyena	1		1	B
2014-07-02	July	2014	Waterbuck		1	1	B
2014-07-03	July	2014	Waterbuck	1	1	2	B
2014-07-04	July	2014	Waterbuck	1		1	B
2014-07-04	July	2014	Elephant	2	2	4	B
2014-07-04	July	2014	Hyena	1		1	B
2014-07-05	July	2014	Elephant	20	13	33	B
2014-07-05	July	2014	Waterbuck	1	2	3	B
2014-07-05	July	2014	Hyena	1	1	2	B
2014-07-06	July	2014	Waterbuck	1	1	2	B
2014-07-06	July	2014	Elephant	21	17	38	B
2014-07-06	July	2014	Hyena		2	2	B
2014-07-07	July	2014	Hyena	11	2	13	B
2014-07-07	July	2014	Waterbuck	1		1	B
2014-07-08	July	2014	Elephant	14	36	50	B
2014-07-08	July	2014	Waterbuck	1	2	3	B
2014-07-09	July	2014	Hyena		1	1	B
2014-07-09	July	2014	Elephant	12	30	42	B
2014-07-09	July	2014	Waterbuck	1		1	B
2014-07-10	July	2014	Hyena	1	3	4	B
2014-07-10	July	2014	Waterbuck	1	1	2	B
2014-07-10	July	2014	Elephant	25	30	55	B
2014-07-11	July	2014	Waterbuck	1		1	B
2014-07-11	July	2014	Elephant	6	5	11	B
2014-07-11	July	2014	Lion	2	2	4	B
2014-07-11	July	2014	Hyena	1		1	B
2014-07-12	July	2014	Elephant	26	23	49	B
2014-07-12	July	2014	Waterbuck	1	2	3	B
2014-07-12	July	2014	Hyena		1	1	B
2014-07-13	July	2014	Waterbuck	1		1	B
2014-07-13	July	2014	Cheetah		1	1	B
2014-07-13	July	2014	Eland		1	1	B
2014-07-13	July	2014	Elephant	22	23	45	B
2014-07-14	July	2014				0	B
2014-07-15	July	2014	Waterbuck		1	1	B
2014-07-16	July	2014	Waterbuck	2	1	3	B
2014-07-17	July	2014	Hyena	1	2	3	B
2014-07-17	July	2014	Waterbuck		2	2	B
2014-07-18	July	2014	Hyena		1	1	B
2014-07-18	July	2014	Waterbuck	1	1	2	B
2014-07-19	July	2014	Elephant	6	2	8	B
2014-07-19	July	2014	Hyena		2	2	B
2014-07-20	July	2014	Hyena	2	1	3	B
2014-07-20	July	2014	Waterbuck	2		2	B
2014-07-20	July	2014	Elephant		12	12	B
2014-07-21	July	2014	Hyena	2		2	B
2014-07-21	July	2014	Elephant		14	14	B
2014-07-21	July	2014	Waterbuck		2	2	B
2014-07-22	July	2014	Waterbuck	1		1	B
2014-07-22	July	2014	Hyena		2	2	B
2014-07-22	July	2014	Elephant	23	1	24	B
2014-07-23	July	2014	Waterbuck	1	1	2	B
2014-07-23	July	2014	Elephant	8	8	16	B
2014-07-24	July	2014	Waterbuck	1	1	2	B
2014-07-25	July	2014				0	B
2014-07-26	July	2014	Hyena	1	2	3	B
2014-07-26	July	2014	Elephant	48	21	69	B
2014-07-26	July	2014	Waterbuck		1	1	B
2014-07-27	July	2014	Elephant	4	25	29	B
2014-07-27	July	2014	Waterbuck	1		1	B
2014-07-28	July	2014	Eland		1	1	B
2014-07-28	July	2014	Elephant		27	27	B
2014-07-28	July	2014	Waterbuck		1	1	B
2014-07-28	July	2014	Hyena		2	2	B
2014-07-29	July	2014	Elephant	21		21	B
2014-07-29	July	2014	Waterbuck	1		1	B
2014-07-29	July	2014	Hyena		1	1	B
2014-07-29	July	2014	Eland	1		1	B
2014-07-30	July	2014	Elephant		1	1	B
2014-07-30	July	2014	Hyena	1	1	2	B
2014-07-30	July	2014	Waterbuck		1	1	B
2014-07-30	July	2014	Elephant	1		1	B
2014-07-31	July	2014	Waterbuck	1		1	B
2014-08-01	August	2014	Eland		1	1	B
2014-08-01	August	2014	Waterbuck		1	1	B
2014-08-02	August	2014	Waterbuck	1		1	B
2014-08-02	August	2014	Hyena	5		5	B
2014-08-02	August	2014	Elephant		1	1	B
2014-08-02	August	2014	Eland	1		1	B
2014-08-03	August	2014				0	B
2014-08-04	August	2014				0	B
2014-08-05	August	2014	Waterbuck		1	1	B
2014-08-05	August	2014	Elephant	11		11	B
2014-08-05	August	2014	Giraffe	2	1	3	B
2014-08-06	August	2014	Waterbuck	1		1	B
2014-08-06	August	2014	Giraffe		1	1	B
2014-08-06	August	2014	Elephant	5	15	20	B
2014-08-06	August	2014	Leopard	1		1	B
2014-08-07	August	2014	Waterbuck	1		1	B
2014-08-08	August	2014				0	B
2014-08-09	August	2014				0	B
2014-08-10	August	2014				0	B
2014-08-11	August	2014				0	B
2014-08-12	August	2014				0	B
2014-08-13	August	2014				0	B
2014-08-14	August	2014				0	B
2014-08-15	August	2014	Elephant	16		16	B
2014-08-15	August	2014	Waterbuck		2	2	B
2014-08-15	August	2014	Giraffe	1		1	B
2014-08-16	August	2014	Waterbuck	3	2	5	B
2014-08-16	August	2014	Elephant		19	19	B
2014-08-16	August	2014	Giraffe		1	1	B
2014-08-16	August	2014	Hyena		1	1	B
2014-08-17	August	2014	Elephant	16	16	32	B
2014-08-17	August	2014	Waterbuck	1	1	2	B
2014-08-17	August	2014	Hyena		2	2	B
2014-08-18	August	2014	Hyena	1	2	3	B
2014-08-18	August	2014	Elephant	6	7	13	B
2014-08-18	August	2014	Waterbuck	1	2	3	B
2014-08-19	August	2014	Waterbuck	1		1	B
2014-08-19	August	2014	Hyena	2		2	B
2014-08-19	August	2014	Giraffe	1		1	B
2014-08-20	August	2014	Waterbuck		1	1	B
2014-08-20	August	2014	Hyena		2	2	B
2014-08-21	August	2014	Waterbuck	1		1	B
2014-08-21	August	2014	Elephant	1		1	B
2014-08-22	August	2014	Waterbuck	3	2	5	B
2014-08-22	August	2014	Hyena	1		1	B
2014-08-23	August	2014	Waterbuck	2	1	3	B
2014-08-23	August	2014	Hyena	4	3	7	B
2014-08-24	August	2014	Hyena		1	1	B
2014-08-24	August	2014	Elephant		24	24	B
2014-08-24	August	2014	Waterbuck	1	2	3	B
2014-08-25	August	2014	Waterbuck	1	1	2	B
2014-08-25	August	2014	Hyena	2		2	B
2014-08-26	August	2014	Elephant	8		8	B
2014-08-26	August	2014	Waterbuck		1	1	B
2014-08-27	August	2014	Waterbuck	1	1	2	B
2014-08-27	August	2014	Hyena	1		1	B
2014-08-28	August	2014	Hyena		1	1	B
2014-08-28	August	2014	Elephant	1		1	B
2014-08-29	August	2014	Elephant	35		35	B
2014-08-29	August	2014	Waterbuck	2	1	3	B
2014-08-29	August	2014	Hyena	1		1	B
2014-08-30	August	2014	Elephant	1	7	8	B
2014-08-30	August	2014	Hyena	1		1	B
2014-08-30	August	2014	Lion		1	1	B
2014-08-30	August	2014	Elephant	36	38	74	B
2014-08-30	August	2014	Giraffe	1		1	B
2014-08-30	August	2014	Hyena		2	2	B
2014-08-31	August	2014	Elephant		3	3	B
2014-08-31	August	2014	Waterbuck	1	1	2	B

## Sheet: All - After
Date	Month	Year	Species	To Lewa	To Borana	TOTAL AFTER	B or A
2016-02-01	February	2016	Elephant	8	2	10	A
2016-02-01	February	2016	Hyena		1	1	A
2016-02-02	February	2016	Elephant	2		2	A
2016-02-03	February	2016	Hyena	1		1	A
2016-02-03	February	2016	Leopard		2	2	A
2016-02-04	February	2016	Elephant		1	1	A
2016-02-04	February	2016	Hyena		2	2	A
2016-02-05	February	2016				0	A
2016-02-06	February	2016	Elephant	1	1	2	A
2016-02-07	February	2016	Elephant		1	1	A
2016-02-07	February	2016	Waterbuck		1	1	A
2016-02-08	February	2016				0	A
2016-02-09	February	2016	Buffalo	10	5	15	A
2016-02-09	February	2016	Elephant		1	1	A
2016-02-10	February	2016	Buffalo	5	10	15	A
2016-02-10	February	2016	Hyena	1		1	A
2016-02-11	February	2016	Buffalo	14		14	A
2016-02-11	February	2016	Hyena	1	1	2	A
2016-02-12	February	2016				0	A
2016-02-13	February	2016				0	A
2016-02-14	February	2016				0	A
2016-02-15	February	2016	Elephant		2	2	A
2016-02-15	February	2016	Hyena	1		1	A
2016-02-16	February	2016				0	A
2016-02-17	February	2016				0	A
2016-02-18	February	2016				0	A
2016-02-19	February	2016				0	A
2016-02-20	February	2016				0	A
2016-02-21	February	2016				0	A
2016-02-22	February	2016				0	A
2016-02-23	February	2016				0	A
2016-02-24	February	2016				0	A
2016-02-25	February	2016				0	A
2016-02-26	February	2016	Elephant	19	1	20	A
2016-02-27	February	2016	Elephant	20	19	39	A
2016-02-27	February	2016	Leopard	1		1	A
2016-02-28	February	2016	Leopard	3	1	4	A
2016-02-29	February	2016	Eland	1	1	2	A
2016-03-01	March	2016	Hyena	1		1	A
2016-03-01	March	2016	Leopard	1	2	3	A
2016-03-02	March	2016				0	A
2016-03-03	March	2016				0	A
2016-03-04	March	2016				0	A
2016-03-05	March	2016				0	A
2016-03-06	March	2016				0	A
2016-03-07	March	2016				0	A
2016-03-08	March	2016				0	A
2016-03-09	March	2016	Eland	1		1	A
2016-03-09	March	2016	Elephant	1	1	2	A
2016-03-09	March	2016	Hyena	1		1	A
2016-03-10	March	2016	Hyena	2	1	3	A
2016-03-11	March	2016	Giraffe	1		1	A
2016-03-11	March	2016	Hyena	2	2	4	A
2016-03-12	March	2016	Hyena	2	3	5	A
2016-03-13	March	2016	Eland	1		1	A
2016-03-13	March	2016	Plains zebra	1		1	A
2016-03-14	March	2016	Hyena		1	1	A
2016-03-15	March	2016	Hyena		1	1	A
2016-03-16	March	2016	Elephant	1		1	A
2016-03-17	March	2016	Hyena		1	1	A
2016-03-17	March	2016	White Rhino	2		2	A
2016-03-18	March	2016	Hyena	2	2	4	A
2016-03-19	March	2016	Eland		1	1	A
2016-03-19	March	2016	Giraffe		1	1	A
2016-03-19	March	2016	Hyena	1	1	2	A
2016-03-19	March	2016	Plains zebra	7		7	A
2016-03-20	March	2016	Lion		2	2	A
2016-03-21	March	2016				0	A
2016-03-22	March	2016	Hyena	1		1	A
2016-03-23	March	2016	Hyena		2	2	A
2016-03-23	March	2016	Waterbuck		1	1	A
2016-03-24	March	2016	Hyena		2	2	A
2016-03-25	March	2016	Elephant	8		8	A
2016-03-25	March	2016	Giraffe	1	1	2	A
2016-03-25	March	2016	Hyena	2	1	3	A
2016-03-25	March	2016	Leopard		1	1	A
2016-03-26	March	2016	Hyena	4		4	A
2016-03-27	March	2016	Elephant	1	10	11	A
2016-03-27	March	2016	Hyena	1		1	A
2016-03-28	March	2016	Hyena	2	1	3	A
2016-03-29	March	2016	Buffalo	1		1	A
2016-03-30	March	2016	Eland	2	8	10	A
2016-03-30	March	2016	Hyena		1	1	A
2016-03-30	March	2016	White Rhino	1	1	2	A
2016-03-31	March	2016	Hyena	1		1	A
2016-04-01	April	2016	Hyena	1	1	2	A
2016-04-02	April	2016				0	A
2016-04-03	April	2016				0	A
2016-04-04	April	2016	Hyena	2		2	A
2016-04-05	April	2016				0	A
2016-04-06	April	2016	Eland	10		10	A
2016-04-06	April	2016	Hyena		2	2	A
2016-04-07	April	2016	Elephant		1	1	A
2016-04-07	April	2016	Hyena		2	2	A
2016-04-08	April	2016	Elephant	8	3	11	A
2016-04-08	April	2016	Hyena		5	5	A
2016-04-09	April	2016	Eland		2	2	A
2016-04-09	April	2016	Elephant	2		2	A
2016-04-10	April	2016				0	A
2016-04-11	April	2016	Hyena		1	1	A
2016-04-12	April	2016	Elephant	9		9	A
2016-04-13	April	2016				0	A
2016-04-14	April	2016	Elephant	5	6	11	A
2016-04-15	April	2016	Elephant	1	1	2	A
2016-04-15	April	2016	Hyena	1	2	3	A
2016-04-16	April	2016				0	A
2016-04-17	April	2016	Hyena	1		1	A
2016-04-17	April	2016	Plains zebra		6	6	A
2016-04-18	April	2016	Elephant		11	11	A
2016-04-18	April	2016	Waterbuck		1	1	A
2016-04-19	April	2016	Elephant		1	1	A
2016-04-20	April	2016				0	A
2016-04-21	April	2016				0	A
2016-04-22	April	2016	Elephant	3		3	A
2016-04-22	April	2016	Hyena		2	2	A
2016-04-23	April	2016	Giraffe	1	1	2	A
2016-04-24	April	2016	Giraffe		1	1	A
2016-04-24	April	2016	Hyena		1	1	A
2016-04-24	April	2016	Waterbuck		2	2	A
2016-04-25	April	2016	Elephant	5	5	10	A
2016-04-25	April	2016	Elephant		7	7	A
2016-04-25	April	2016	Hyena	1		1	A
2016-04-26	April	2016	Elephant		2	2	A
2016-04-26	April	2016	Hyena		1	1	A
2016-04-26	April	2016	Plains zebra		8	8	A
2016-04-26	April	2016	Waterbuck	6		6	A
2016-04-27	April	2016	Buffalo	1		1	A
2016-04-27	April	2016	Elephant		1	1	A
2016-04-27	April	2016	Hyena	1		1	A
2016-04-28	April	2016	Hyena	1	2	3	A
2016-04-29	April	2016	Eland		3	3	A
2016-04-29	April	2016	Elephant	1		1	A
2016-04-29	April	2016	Leopard		1	1	A
2016-04-29	April	2016	Waterbuck		1	1	A
2016-04-30	April	2016	Hyena		3	3	A
2016-05-01	May	2016	Waterbuck		1	1	A
2016-05-02	May	2016				0	A
2016-05-03	May	2016	Elephant	8	5	13	A
2016-05-03	May	2016	Hyena	1		1	A
2016-05-03	May	2016	Plains zebra	1		1	A
2016-05-03	May	2016	Waterbuck		1	1	A
2016-05-04	May	2016	Eland		5	5	A
2016-05-04	May	2016	Giraffe	3	2	5	A
2016-05-05	May	2016	Eland	1	1	2	A
2016-05-05	May	2016	Hyena		3	3	A
2016-05-05	May	2016	Plains zebra	3		3	A
2016-05-05	May	2016	Waterbuck	6		6	A
2016-05-06	May	2016	Elephant		10	10	A
2016-05-06	May	2016	Waterbuck	5	5	10	A
2016-05-07	May	2016	Buffalo		16	16	A
2016-05-07	May	2016	Elephant		2	2	A
2016-05-08	May	2016				0	A
2016-05-09	May	2016	Plains zebra		2	2	A
2016-05-09	May	2016	Waterbuck	1		1	A
2016-05-10	May	2016	Leopard	1	1	2	A
2016-05-10	May	2016	Plains zebra	6		6	A
2016-05-10	May	2016	Waterbuck	1	12	13	A
2016-05-11	May	2016				0	A
2016-05-12	May	2016				0	A
2016-05-13	May	2016	Giraffe	2	2	4	A
2016-05-14	May	2016	Elephant	3	3	6	A
2016-05-15	May	2016	Elephant	1		1	A
2016-05-15	May	2016	Plains zebra	4		4	A
2016-05-16	May	2016	Elephant		3	3	A
2016-05-16	May	2016	Giraffe	2	3	5	A
2016-05-16	May	2016	Leopard	1		1	A
2016-05-16	May	2016	Plains zebra	3		3	A
2016-05-17	May	2016	Buffalo	7		7	A
2016-05-17	May	2016	Hyena		1	1	A
2016-05-18	May	2016	Giraffe	1		1	A
2016-05-19	May	2016	Giraffe	1		1	A
2016-05-19	May	2016	Hyena	1		1	A
2016-05-19	May	2016	Plains zebra	3		3	A
2016-05-20	May	2016	Waterbuck	1		1	A
2016-05-21	May	2016	Giraffe		1	1	A
2016-05-21	May	2016	Plains zebra	2	1	3	A
2016-05-21	May	2016	Waterbuck	3		3	A
2016-05-22	May	2016	Elephant		1	1	A
2016-05-22	May	2016	Elephant	4		4	A
2016-05-22	May	2016	Giraffe	1	2	3	A
2016-05-23	May	2016	Giraffe		1	1	A
2016-05-23	May	2016	Hyena		1	1	A
2016-05-24	May	2016				0	A
2016-05-25	May	2016	Elephant	11	6	17	A
2016-05-25	May	2016	Hyena	2		2	A
2016-05-25	May	2016	Hyena		2	2	A
2016-05-26	May	2016	Hyena	1	1	2	A
2016-05-27	May	2016				0	A
2016-05-28	May	2016	Waterbuck		3	3	A
2016-05-29	May	2016	Hyena		1	1	A
2016-05-30	May	2016	Giraffe	1	2	3	A
2016-05-30	May	2016	Plains zebra	6	7	13	A
2016-05-31	May	2016	Eland	5		5	A
2016-05-31	May	2016	Elephant		6	6	A
2016-06-01	June	2016	Plains zebra	4		4	A
2016-06-02	June	2016	Hyena	1	2	3	A
2016-06-02	June	2016	Plains zebra	6		6	A
2016-06-03	June	2016	Black rhino		1	1	A
2016-06-03	June	2016	Buffalo		39	39	A
2016-06-04	June	2016				0	A
2016-06-05	June	2016	Buffalo	35		35	A
2016-06-05	June	2016	Elephant	6		6	A
2016-06-06	June	2016				0	A
2016-06-07	June	2016	Elephant	2	2	4	A
2016-06-07	June	2016	Kudu	4	3	7	A
2016-06-07	June	2016	Plains zebra	6		6	A
2016-06-08	June	2016	Elephant	1	2	3	A
2016-06-08	June	2016	Giraffe	1	1	2	A
2016-06-08	June	2016	Plains zebra		7	7	A
2016-06-09	June	2016	Elephant		5	5	A
2016-06-09	June	2016	Plains zebra	8		8	A
2016-06-10	June	2016	Elephant	2	2	4	A
2016-06-10	June	2016	Plains zebra	3		3	A
2016-06-10	June	2016	Warthog	1		1	A
2016-06-11	June	2016				0	A
2016-06-12	June	2016	Elephant		2	2	A
2016-06-13	June	2016	Buffalo	1		1	A
2016-06-13	June	2016	Elephant		2	2	A
2016-06-14	June	2016	Elephant	1	1	2	A
2016-06-15	June	2016	Hyena	1		1	A
2016-06-16	June	2016				0	A
2016-06-17	June	2016				0	A
2016-06-18	June	2016				0	A
2016-06-19	June	2016				0	A
2016-06-20	June	2016	Elephant	6		6	A
2016-06-21	June	2016	Grevy's zebra	1		1	A
2016-06-21	June	2016	Hyena	11		11	A
2016-06-22	June	2016	Elephant	1	7	8	A
2016-06-23	June	2016	Elephant		2	2	A
2016-06-24	June	2016	Hartebeest		1	1	A
2016-06-24	June	2016	Hyena	3		3	A
2016-06-25	June	2016	Elephant	5	5	10	A
2016-06-25	June	2016	Jackal		1	1	A
2016-06-25	June	2016	Lion		1	1	A
2016-06-26	June	2016	Hyena	1		1	A
2016-06-27	June	2016	Elephant	3	21	24	A
2016-06-28	June	2016				0	A
2016-06-29	June	2016				0	A
2016-06-30	June	2016	Elephant		1	1	A
2016-06-30	June	2016	Plains zebra	4		4	A
2016-07-01	July	2016	Elephant		5	5	A
2016-07-02	July	2016	Elephant	6	1	7	A
2016-07-03	July	2016	Elephant	1	1	2	A
2016-07-03	July	2016	Hyena		1	1	A
2016-07-04	July	2016	Giraffe	1		1	A
2016-07-04	July	2016	Hyena	3	1	4	A
2016-07-04	July	2016	White Rhino		1	1	A
2016-07-05	July	2016	Elephant	9	6	15	A
2016-07-05	July	2016	White Rhino	1		1	A
2016-07-06	July	2016	Hyena		3	3	A
2016-07-06	July	2016	Plains zebra		6	6	A
2016-07-07	July	2016	Black rhino		1	1	A
2016-07-07	July	2016	Elephant		2	2	A
2016-07-08	July	2016	Hyena		10	10	A
2016-07-09	July	2016	Black rhino	1	1	2	A
2016-07-09	July	2016	Elephant		17	17	A
2016-07-09	July	2016	Hyena	1	5	6	A
2016-07-10	July	2016				0	A
2016-07-11	July	2016				0	A
2016-07-12	July	2016				0	A
2016-07-13	July	2016	Elephant	10	6	16	A
2016-07-13	July	2016	Plains zebra	4	4	8	A
2016-07-14	July	2016	Elephant	1		1	A
2016-07-14	July	2016	Hyena	1	1	2	A
2016-07-15	July	2016	Leopard	1		1	A
2016-07-15	July	2016	White Rhino	1	1	2	A
2016-07-16	July	2016	Hyena		1	1	A
2016-07-17	July	2016	Hyena	2		2	A
2016-07-18	July	2016	Elephant		2	2	A
2016-07-18	July	2016	Giraffe	1		1	A
2016-07-19	July	2016	Buffalo	1		1	A
2016-07-20	July	2016	Leopard		1	1	A
2016-07-21	July	2016	Hyena	1		1	A
2016-07-22	July	2016	Elephant		4	4	A
2016-07-22	July	2016	White Rhino	1	1	2	A
2016-07-23	July	2016	Elephant		1	1	A
2016-07-24	July	2016	Plains zebra		4	4	A
2016-07-25	July	2016	Elephant	5	1	6	A
2016-07-25	July	2016	Giraffe	1		1	A
2016-07-26	July	2016	Elephant		1	1	A
2016-07-26	July	2016	Hyena		4	4	A
2016-07-27	July	2016	Elephant		7	7	A
2016-07-28	July	2016	Elephant	1	11	12	A
2016-07-29	July	2016				0	A
2016-07-30	July	2016				0	A
2016-07-31	July	2016	Hyena		1	1	A
2016-08-01	August	2016				0	A
2016-08-02	August	2016				0	A
2016-08-03	August	2016				0	A
2016-08-04	August	2016				0	A
2016-08-05	August	2016				0	A
2016-08-06	August	2016	Giraffe		1	1	A
2016-08-06	August	2016	Hyena		1	1	A
2016-08-07	August	2016				0	A
2016-08-08	August	2016	Elephant		2	2	A
2016-08-08	August	2016	Hyena		2	2	A
2016-08-09	August	2016	Plains zebra		1	1	A
2016-08-10	August	2016				0	A
2016-08-11	August	2016	Ostrich	1		1	A
2016-08-11	August	2016	White Rhino		1	1	A
2016-08-12	August	2016	Hyena	1		1	A
2016-08-12	August	2016	White Rhino	1		1	A
2016-08-13	August	2016	Giraffe		1	1	A
2016-08-13	August	2016	Giraffe	1		1	A
2016-08-14	August	2016	Elephant		5	5	A
2016-08-15	August	2016	Hyena		1	1	A
2016-08-16	August	2016	Elephant		4	4	A
2016-08-16	August	2016	Hyena		1	1	A
2016-08-17	August	2016				0	A
2016-08-18	August	2016				0	A
2016-08-19	August	2016				0	A
2016-08-20	August	2016	Hyena	1	5	6	A
2016-08-21	August	2016	Giraffe	1	1	2	A
2016-08-22	August	2016				0	A
2016-08-23	August	2016				0	A
2016-08-24	August	2016				0	A
2016-08-25	August	2016				0	A
2016-08-26	August	2016				0	A
2016-08-27	August	2016				0	A
2016-08-28	August	2016				0	A
2016-08-29	August	2016				0	A
2016-08-30	August	2016	Leopard	1		1	A
2016-08-31	August	2016	Black rhino	1		1	A
2016-08-31	August	2016	Plains zebra	1		1	A
2016-09-01	September	2016	Hyena		1	1	A
2016-09-02	September	2016	Hyena	1	2	3	A
2016-09-03	September	2016	Giraffe		1	1	A
2016-09-04	September	2016	Giraffe	2	2	4	A
2016-09-04	September	2016	Hyena	1		1	A
2016-09-05	September	2016				0	A
2016-09-06	September	2016	Black rhino	1		1	A
2016-09-06	September	2016	Hyena	1		1	A
2016-09-06	September	2016	Plains zebra		6	6	A
2016-09-06	September	2016	Waterbuck		2	2	A
2016-09-07	September	2016				0	A
2016-09-08	September	2016	Hyena		2	2	A
2016-09-08	September	2016	Plains zebra		3	3	A
2016-09-09	September	2016				0	A
2016-09-10	September	2016				0	A
2016-09-11	September	2016	Giraffe		1	1	A
2016-09-11	September	2016				0	A
2016-09-12	September	2016	Elephant	1		1	A
2016-09-12	September	2016	Hyena		1	1	A
2016-09-12	September	2016	Plains zebra	2		2	A
2016-09-13	September	2016	Elephant	1	2	3	A
2016-09-14	September	2016	Hyena	3		3	A
2016-09-14	September	2016	Plains zebra		1	1	A
2016-09-15	September	2016				0	A
2016-09-16	September	2016				0	A
2016-09-17	September	2016	Elephant	1		1	A
2016-09-17	September	2016	Giraffe		1	1	A
2016-09-17	September	2016	Hyena	1		1	A
2016-09-17	September	2016	Plains zebra		4	4	A
2016-09-18	September	2016	Warthog	1		1	A
2016-09-19	September	2016				0	A
2016-09-20	September	2016				0	A
2016-09-21	September	2016	Hyena	1		1	A
2016-09-22	September	2016				0	A
2016-09-23	September	2016				0	A
2016-09-24	September	2016				0	A
2016-09-25	September	2016	Waterbuck		1	1	A
2016-09-26	September	2016				0	A
2016-09-27	September	2016	Hyena		1	1	A
2016-09-27	September	2016	Plains zebra		5	5	A
2016-09-28	September	2016	White rhino	1		1	A
2016-09-29	September	2016				0	A
2016-09-30	September	2016				0	A
2016-10-01	October	2016	Giraffe		1	1	A
2016-10-02	October	2016	Warthog		1	1	A
2016-10-03	October	2016				0	A
2016-10-04	October	2016	Plains zebra	4		4	A
2016-10-04	October	2016	White rhino		1	1	A
2016-10-05	October	2016	Elephant	3		3	A
2016-10-05	October	2016	Giraffe		2	2	A
2016-10-05	October	2016	Hyena		1	1	A
2016-10-05	October	2016	Kudu		4	4	A
2016-10-05	October	2016	Plains zebra		2	2	A
2016-10-05	October	2016	White rhino	1		1	A
2016-10-06	October	2016	Hyena	1		1	A
2016-10-07	October	2016				0	A
2016-10-08	October	2016	Plains zebra	26		26	A
2016-10-09	October	2016	Hyena	1		1	A
2016-10-10	October	2016				0	A
2016-10-11	October	2016				0	A
2016-10-12	October	2016	Elephant	1		1	A
2016-10-12	October	2016	Hyena	1	3	4	A
2016-10-12	October	2016	Plains zebra		9	9	A
2016-10-13	October	2016	Elephant		8	8	A
2016-10-13	October	2016	Giraffe		1	1	A
2016-10-14	October	2016	Elephant		3	3	A
2016-10-15	October	2016	Elephant	4		4	A
2016-10-15	October	2016	Hyena	1		1	A
2016-10-16	October	2016	Kudu	1	1	2	A
2016-10-17	October	2016	Elephant	2	8	10	A
2016-10-18	October	2016	Elephant		2	2	A
2016-10-18	October	2016	Leopard		1	1	A
2016-10-19	October	2016	Giraffe		1	1	A
2016-10-20	October	2016				0	A
2016-10-21	October	2016	Hyena		1	1	A
2016-10-22	October	2016	Eland	5		5	A
2016-10-22	October	2016	Elephant	5		5	A
2016-10-22	October	2016	Giraffe	1		1	A
2016-10-23	October	2016				0	A
2016-10-24	October	2016	Plains zebra		5	5	A
2016-10-25	October	2016				0	A
2016-10-26	October	2016	Elephant	3	2	5	A
2016-10-27	October	2016	Buffalo		3	3	A
2016-10-27	October	2016	Eland		1	1	A
2016-10-28	October	2016	Buffalo	9		9	A
2016-10-28	October	2016	Elephant		6	6	A
2016-10-29	October	2016	Buffalo	7		7	A
2016-10-29	October	2016	Plains zebra		4	4	A
2016-10-30	October	2016	Hyena	3		3	A
2016-10-30	October	2016	Hyena	1		1	A
2016-10-30	October	2016	Lion		1	1	A
2016-10-30	October	2016	Lion		1	1	A
2016-10-31	October	2016	Hyena	2	3	5	A
2016-10-31	October	2016	Plains zebra	4		4	A
2016-11-01	November	2016				0	A
2016-11-02	November	2016	Giraffe		1	1	A
2016-11-02	November	2016	Plains zebra	8	1	9	A
2016-11-03	November	2016	Plains zebra	3	11	14	A
2016-11-04	November	2016				0	A
2016-11-05	November	2016	Kudu		4	4	A
2016-11-06	November	2016	Grant Gazelle	3	1	4	A
2016-11-06	November	2016	Plains zebra		3	3	A
2016-11-07	November	2016	Elephant	1		1	A
2016-11-07	November	2016	Waterbuck		5	5	A
2016-11-08	November	2016				0	A
2016-11-09	November	2016	Elephant	1		1	A
2016-11-09	November	2016	Hyena	1		1	A
2016-11-10	November	2016	Elephant	1		1	A
2016-11-11	November	2016	Elephant	1	2	3	A
2016-11-12	November	2016				0	A
2016-11-13	November	2016				0	A
2016-11-14	November	2016	Elephant	7		7	A
2016-11-14	November	2016	Plains zebra		6	6	A
2016-11-15	November	2016	Elephant		5	5	A
2016-11-16	November	2016	Elephant	2		2	A
2016-11-16	November	2016	Hyena		1	1	A
2016-11-17	November	2016				0	A
2016-11-18	November	2016	Hartebeest	1		1	A
2016-11-18	November	2016	Hyena	1	1	2	A
2016-11-18	November	2016	Lion		11	11	A
2016-11-19	November	2016				0	A
2016-11-20	November	2016	Giraffe		1	1	A
2016-11-20	November	2016	Grant Gazelle		2	2	A
2016-11-20	November	2016	Hyena	1		1	A
2016-11-20	November	2016	Waterbuck		3	3	A
2016-11-21	November	2016	Elephant		11	11	A
2016-11-21	November	2016	Lion		5	5	A
2016-11-22	November	2016	Hyena	2		2	A
2016-11-23	November	2016				0	A
2016-11-24	November	2016	Elephant	12	10	22	A
2016-11-25	November	2016	Giraffe	3		3	A
2016-11-25	November	2016	Hyena		1	1	A
2016-11-25	November	2016	Hyena		2	2	A
2016-11-25	November	2016	Plains zebra	1		1	A
2016-11-26	November	2016	Giraffe		1	1	A
2016-11-27	November	2016	Eland		4	4	A
2016-11-28	November	2016	Grant Gazelle	1		1	A
2016-11-28	November	2016	Hyena	1		1	A
2016-11-28	November	2016	Plains zebra	4		4	A
2016-11-29	November	2016	Eland	4		4	A
2016-11-29	November	2016	Elephant		9	9	A
2016-11-30	November	2016				0	A
2016-12-01	December	2016	Plains zebra	3	3	6	A
2016-12-02	December	2016	Elephant	8		8	A
2016-12-02	December	2016	Giraffe	1		1	A
2016-12-02	December	2016	Hyena	1		1	A
2016-12-03	December	2016				0	A
2016-12-04	December	2016	Eland	7		7	A
2016-12-05	December	2016	Eland	4		4	A
2016-12-05	December	2016	Hyena		1	1	A
2016-12-06	December	2016	Eland		3	3	A
2016-12-06	December	2016	Elephant	3	5	8	A
2016-12-07	December	2016	Elephant	4		4	A
2016-12-08	December	2016				0	A
2016-12-09	December	2016	Black rhino	2		2	A
2016-12-10	December	2016	Eland	7	2	9	A
2016-12-10	December	2016	Hyena		1	1	A
2016-12-11	December	2016	Black rhino	1	1	2	A
2016-12-11	December	2016	Plains zebra	1		1	A
2016-12-12	December	2016				0	A
2016-12-13	December	2016	Mongoose	1	1	2	A
2016-12-14	December	2016				0	A
2016-12-15	December	2016	Hyena	1		1	A
2016-12-15	December	2016	Plains zebra	2	4	6	A
2016-12-16	December	2016				0	A
2016-12-17	December	2016				0	A
2016-12-18	December	2016	Hyena	1	1	2	A
2016-12-18	December	2016	Plains zebra		2	2	A
2016-12-19	December	2016				0	A
2016-12-20	December	2016				0	A
2016-12-21	December	2016				0	A
2016-12-22	December	2016				0	A
2016-12-23	December	2016				0	A
2016-12-24	December	2016				0	A
2016-12-25	December	2016				0	A
2016-12-26	December	2016				0	A
2016-12-27	December	2016				0	A
2016-12-28	December	2016				0	A
2016-12-29	December	2016				0	A
2016-12-30	December	2016				0	A
2016-12-31	December	2016				0	A
2017-01-01	January	2017				0	A
2017-01-02	January	2017				0	A
2017-01-03	January	2017	Plains zebra		3	3	A
2017-01-04	January	2017	Hyena	1		1	A
2017-01-04	January	2017	Warthog		1	1	A
2017-01-05	January	2017				0	A
2017-01-07	January	2017	Elephant	1	2	3	A
2017-01-07	January	2017	Giraffe	3		3	A
2017-01-07	January	2017	Plains zebra	6	5	11	A
2017-01-08	January	2017	Giraffe	3		3	A
2017-01-08	January	2017	Hyena	4		4	A
2017-01-08	January	2017	Plains zebra	8		8	A
2017-01-09	January	2017	Elephant	11		11	A
2017-01-09	January	2017	Giraffe	2		2	A
2017-01-10	January	2017	Giraffe	1		1	A
2017-01-10	January	2017	Hyena		2	2	A
2017-01-11	January	2017				0	A
2017-01-12	January	2017	Giraffe	1	1	2	A
2017-01-13	January	2017				0	A
2017-01-14	January	2017	Hyena		2	2	A
2017-01-15	January	2017				0	A
2017-01-16	January	2017	Jackal		1	1	A
2017-01-16	January	2017	Waterbuck		1	1	A
2017-01-17	January	2017	Elephant	1		1	A
2017-01-17	January	2017	Plains zebra		3	3	A
2017-01-18	January	2017	Hyena		1	1	A
2017-01-18	January	2017	Plains zebra		2	2	A
2017-01-19	January	2017	Plains zebra		3	3	A
2017-01-20	January	2017	Elephant	1		1	A
2017-01-20	January	2017	Wilddog		1	1	A
2017-01-21	January	2017	Plains zebra	2		2	A
2017-01-22	January	2017	Eland		1	1	A
2017-01-22	January	2017	Elephant	1	6	7	A
2017-01-22	January	2017	Giraffe		1	1	A
2017-01-22	January	2017	Hyena	1		1	A
2017-01-23	January	2017	Hyena		1	1	A
2017-01-23	January	2017	Lion		11	11	A
2017-01-24	January	2017	Black rhino		1	1	A
2017-01-25	January	2017	Black rhino	1		1	A
2017-01-25	January	2017	Hyena	1	1	2	A
2017-01-25	January	2017	Kudu	6		6	A
2017-01-25	January	2017	Plains zebra	3		3	A
2017-01-26	January	2017	Plains zebra		8	8	A
2017-01-27	January	2017	Elephant		1	1	A
2017-01-27	January	2017	Waterbuck	9		9	A
2017-01-28	January	2017	Elephant		4	4	A
2017-01-29	January	2017				0	A
2017-01-30	January	2017				0	A
2017-01-31	January	2017				0	A
2017-02-01	February	2017	Elephant		1	1	A
2017-02-02	February	2017	Giraffe	1		1	A
2017-02-03	February	2017	Buffalo	4		4	A
2017-02-04	February	2017				0	A
2017-02-05	February	2017	Giraffe		1	1	A
2017-02-05	February	2017	Hyena	1	2	3	A
2017-02-05	February	2017	Waterbuck		2	2	A
2017-02-06	February	2017	Lion	1		1	A
2017-02-07	February	2017	Hyena	1		1	A
2017-02-08	February	2017	Eland	1		1	A
2017-02-09	February	2017	Plains zebra	4		4	A
2017-02-10	February	2017				0	A
2017-02-11	February	2017	Lion		2	2	A
2017-02-11	February	2017	Plains zebra		5	5	A
2017-02-12	February	2017	Lion		3	3	A
2017-02-12	February	2017	Plains zebra	16		16	A
2017-02-13	February	2017	Hyena		1	1	A
2017-02-14	February	2017	Giraffe	1	1	2	A
2017-02-15	February	2017	Giraffe		1	1	A
2017-02-15	February	2017	Kudu		4	4	A
2017-02-15	February	2017	Plains zebra		2	2	A
2017-02-16	February	2017				0	A
2017-02-17	February	2017	Waterbuck	3		3	A
2017-02-18	February	2017	Elephant		1	1	A
2017-02-19	February	2017	Hyena	1		1	A
2017-02-20	February	2017	Eland		1	1	A
2017-02-20	February	2017	Hyena		1	1	A
2017-02-20	February	2017	Lion	2	3	5	A
2017-02-21	February	2017	Wilddog	8		8	A
2017-02-22	February	2017	Elephant		2	2	A
2017-02-23	February	2017	Elephant	1	1	2	A
2017-02-24	February	2017	Elephant		5	5	A
2017-02-25	February	2017				0	A
2017-02-26	February	2017	Elephant	1		1	A
2017-02-27	February	2017				0	A
2017-02-28	February	2017				0	A
2017-03-01	March	2017	Elephant	10	6	16	A
2017-03-02	March	2017				0	A
2017-03-03	March	2017	Elephant		10	10	A
2017-03-03	March	2017	Giraffe		1	1	A
2017-03-04	March	2017	Plains zebra		1	1	A
2017-03-05	March	2017	Wilddog	8		8	A
2017-03-06	March	2017	Lion		7	7	A
2017-03-07	March	2017	Elephant	7		7	A
2017-03-07	March	2017	Plains zebra	5		5	A
2017-03-08	March	2017				0	A
2017-03-09	March	2017				0	A
2017-03-10	March	2017	Elephant	15		15	A
2017-03-10	March	2017	Plains zebra	5	3	8	A
2017-03-11	March	2017	Lion	1		1	A
2017-03-12	March	2017				0	A
2017-03-13	March	2017	Black rhino	1		1	A
2017-03-14	March	2017	Elephant		1	1	A
2017-03-14	March	2017	Plains zebra	8		8	A
2017-03-15	March	2017				0	A
2017-03-16	March	2017	Black rhino	1		1	A
2017-03-17	March	2017	Black rhino	1		1	A
2017-03-17	March	2017	Elephant		1	1	A
2017-03-18	March	2017	Black rhino	1		1	A
2017-03-19	March	2017				0	A
2017-03-20	March	2017				0	A
2017-03-21	March	2017	Elephant	11		11	A
2017-03-22	March	2017				0	A
2017-03-23	March	2017	Black rhino		3	3	A
2017-03-24	March	2017	Black rhino	3		3	A
2017-03-25	March	2017	Elephant	1		1	A
2017-03-26	March	2017	Elephant	1		1	A
2017-03-26	March	2017	Grevy's zebra		1	1	A
2017-03-27	March	2017	Black rhino	2		2	A
2017-03-27	March	2017	Black rhino		1	1	A
2017-03-28	March	2017				0	A
2017-03-29	March	2017				0	A
2017-03-30	March	2017	Giraffe	1		1	A
2017-03-30	March	2017	Grevy's zebra	1	1	2	A
2017-03-30	March	2017	Plains zebra		9	9	A
2017-03-31	March	2017	Elephant	1		1	A
2017-04-01	April	2017	Black rhino		1	1	A
2017-04-01	April	2017	Plains zebra		1	1	A
2017-04-01	April	2017	Wilddog	9		9	A
2017-04-02	April	2017	Elephant	6	2	8	A
2017-04-03	April	2017				0	A
2017-04-04	April	2017				0	A
2017-04-05	April	2017	White rhino		1	1	A
2017-04-06	April	2017	Elephant	23	1	24	A
2017-04-06	April	2017	Hyena		1	1	A
2017-04-06	April	2017	Lion		6	6	A
2017-04-07	April	2017				0	A
2017-04-08	April	2017	Elephant	10		10	A
2017-04-09	April	2017				0	A
2017-04-10	April	2017	Buffalo	20		20	A
2017-04-10	April	2017	Elephant		3	3	A
2017-04-11	April	2017				0	A
2017-04-12	April	2017				0	A
2017-04-13	April	2017	Buffalo		80	80	A
2017-04-13	April	2017	Elephant	1		1	A
2017-04-14	April	2017				0	A
2017-04-15	April	2017				0	A
2017-04-16	April	2017				0	A
2017-04-17	April	2017				0	A
2017-04-18	April	2017				0	A
2017-04-19	April	2017				0	A
2017-04-20	April	2017				0	A
2017-04-21	April	2017				0	A
2017-04-22	April	2017	Elephant		2	2	A
2017-04-22	April	2017	Giraffe	2		2	A
2017-04-22	April	2017	Waterbuck		6	6	A
2017-04-23	April	2017	Giraffe	1		1	A
2017-04-24	April	2017				0	A
2017-04-25	April	2017				0	A
2017-04-26	April	2017				0	A
2017-04-27	April	2017				0	A
2017-04-28	April	2017				0	A
2017-04-29	April	2017				0	A
2017-04-30	April	2017				0	A
2017-05-01	May	2017				0	A
2017-05-02	May	2017				0	A
2017-05-03	May	2017	Plains zebra	3		3	A
2017-05-04	May	2017	Elephant	3		3	A
2017-05-04	May	2017	Plains zebra	3		3	A
2017-05-05	May	2017	White rhino		1	1	A
2017-05-06	May	2017	Elephant	1		1	A
2017-05-06	May	2017	White rhino	1		1	A
2017-05-07	May	2017	Bushbuck		1	1	A
2017-05-07	May	2017	Hyena	1		1	A
2017-05-08	May	2017	Bushbuck		2	2	A
2017-05-08	May	2017	Elephant	18		18	A
2017-05-09	May	2017	Elephant	1		1	A
2017-05-09	May	2017	Giraffe	1		1	A
2017-05-09	May	2017	White rhino	1	1	2	A
2017-05-10	May	2017	White rhino	2	1	3	A
2017-05-11	May	2017	Elephant	13		13	A
2017-05-12	May	2017	Hyena		1	1	A
2017-05-13	May	2017	Giraffe	1		1	A
2017-05-13	May	2017	Hyena	1		1	A
2017-05-13	May	2017	Plains zebra	1	1	2	A
2017-05-14	May	2017	Plains zebra	8		8	A
2017-05-15	May	2017	Giraffe	1		1	A
2017-05-16	May	2017				0	A
2017-05-17	May	2017	Hyena	1		1	A
2017-05-18	May	2017	Giraffe	1		1	A
2017-05-18	May	2017	Hyena	9	5	14	A
2017-05-19	May	2017				0	A
2017-05-20	May	2017				0	A
2017-05-21	May	2017				0	A
2017-05-22	May	2017	Elephant		7	7	A
2017-05-23	May	2017	Elephant		11	11	A
2017-05-23	May	2017	Plains zebra		2	2	A
2017-05-23	May	2017	White rhino	1	1	2	A
2017-05-24	May	2017	Elephant	2		2	A
2017-05-24	May	2017	Plains zebra		2	2	A
2017-05-24	May	2017	White rhino	1		1	A
2017-05-25	May	2017	Elephant		1	1	A
2017-05-25	May	2017	Plains zebra	1		1	A
2017-05-26	May	2017	Plains zebra		1	1	A
2017-05-26	May	2017	Plains zebra	2	7	9	A
2017-05-26	May	2017	Waterbuck		8	8	A
2017-05-27	May	2017				0	A
2017-05-28	May	2017	Elephant	1	17	18	A
2017-05-28	May	2017	Plains zebra		10	10	A
2017-05-28	May	2017	Waterbuck		1	1	A
2017-05-29	May	2017	Elephant		1	1	A
2017-05-29	May	2017	Plains zebra		12	12	A
2017-05-30	May	2017	Waterbuck	1	1	2	A
2017-05-31	May	2017	Eland	10		10	A
2017-05-31	May	2017	Elephant	2	3	5	A
2017-05-31	May	2017	Plains zebra		14	14	A
2017-06-01	June	2017	Elephant		8	8	A
2017-06-01	June	2017	Giraffe		1	1	A
2017-06-01	June	2017	Grevy's zebra	1	2	3	A
2017-06-01	June	2017	Plains zebra		5	5	A
2017-06-02	June	2017	Elephant		1	1	A
2017-06-02	June	2017	Giraffe	1		1	A
2017-06-02	June	2017	Plains zebra	7		7	A
2017-06-02	June	2017	Waterbuck	1		1	A
2017-06-03	June	2017	Elephant	2		2	A
2017-06-03	June	2017	Hyena	1		1	A
2017-06-03	June	2017	Plains zebra		2	2	A
2017-06-04	June	2017	Grevy's zebra	3	1	4	A
2017-06-05	June	2017	Elephant		3	3	A
2017-06-05	June	2017	Plains zebra	11		11	A
2017-06-06	June	2017	Plains zebra		11	11	A
2017-06-07	June	2017				0	A
2017-06-08	June	2017				0	A
2017-06-09	June	2017				0	A
2017-06-10	June	2017				0	A
2017-06-11	June	2017				0	A
2017-06-12	June	2017	Elephant	1		1	A
2017-06-12	June	2017	Giraffe	1		1	A
2017-06-13	June	2017	White rhino	1	1	2	A
2017-06-14	June	2017	Hyena	1		1	A
2017-06-15	June	2017	Elephant		2	2	A
2017-06-15	June	2017	Grevy's zebra	2		2	A
2017-06-15	June	2017	Hyena		2	2	A
2017-06-16	June	2017	Elephant	3	10	13	A
2017-06-16	June	2017	Waterbuck		2	2	A
2017-06-17	June	2017	Elephant	12	2	14	A
2017-06-17	June	2017	Giraffe		1	1	A
2017-06-18	June	2017	Elephant		3	3	A
2017-06-19	June	2017	Elephant	2		2	A
2017-06-19	June	2017	Elephant		1	1	A
2017-06-19	June	2017	Plains zebra	6		6	A
2017-06-20	June	2017	Elephant	1	1	2	A
2017-06-21	June	2017	Elephant	1	4	5	A
2017-06-22	June	2017				0	A
2017-06-23	June	2017				0	A
2017-06-24	June	2017	Giraffe	1		1	A
2017-06-25	June	2017	Elephant	1	1	2	A
2017-06-26	June	2017	Elephant	1	2	3	A
2017-06-27	June	2017				0	A
2017-06-28	June	2017				0	A
2017-06-29	June	2017				0	A
2017-06-30	June	2017				0	A
2017-07-01	July	2017	Elephant	7		7	A
2017-07-01	July	2017	Grevy's zebra	1		1	A
2017-07-02	July	2017	Giraffe		1	1	A
2017-07-03	July	2017	Warthog	1		1	A
2017-07-04	July	2017	Elephant	1		1	A
2017-07-05	July	2017	Elephant	4		4	A
2017-07-05	July	2017	White rhino	1	1	2	A
2017-07-06	July	2017	Elephant	1	2	3	A
2017-07-07	July	2017	Elephant		3	3	A
2017-07-07	July	2017	Giraffe	1		1	A
2017-07-07	July	2017	Hyena	2		2	A
2017-07-08	July	2017	Warthog		1	1	A
2017-07-09	July	2017				0	A
2017-07-10	July	2017	Elephant	10		10	A
2017-07-10	July	2017	Warthog	1		1	A
2017-07-11	July	2017	Elephant		3	3	A
2017-07-12	July	2017				0	A
2017-07-13	July	2017	Elephant		2	2	A
2017-07-13	July	2017	Hyena	1		1	A
2017-07-14	July	2017	Giraffe		1	1	A
2017-07-14	July	2017	Hyena		1	1	A
2017-07-15	July	2017				0	A
2017-07-16	July	2017				0	A
2017-07-17	July	2017	Elephant	1		1	A
2017-07-17	July	2017	Hyena	1		1	A
2017-07-18	July	2017	Giraffe	1	1	2	A
2017-07-18	July	2017	Leopard		1	1	A
2017-07-19	July	2017	Giraffe		1	1	A
2017-07-19	July	2017	White rhino		1	1	A
2017-07-20	July	2017	Elephant		1	1	A
2017-07-21	July	2017	Lion		1	1	A
2017-07-21	July	2017	Waterbuck	2		2	A
2017-07-22	July	2017				0	A
2017-07-23	July	2017				0	A
2017-07-24	July	2017	Elephant	2	2	4	A
2017-07-25	July	2017				0	A
2017-07-26	July	2017	Giraffe		1	1	A
2017-07-27	July	2017				0	A
2017-07-28	July	2017				0	A
2017-07-29	July	2017	Waterbuck	3		3	A
2017-07-30	July	2017				0	A
2017-07-31	July	2017				0	A
2017-08-01	August	2017	Bushbuck	1		1	A
2017-08-01	August	2017	Leopard	1		1	A
2017-08-02	August	2017				0	A
2017-08-03	August	2017	Plains zebra		2	2	A
2017-08-04	August	2017	Ostrich		1	1	A
2017-08-05	August	2017	Elephant		14	14	A
2017-08-06	August	2017	Plains zebra		6	6	A
2017-08-06	August	2017	White rhino		1	1	A
2017-08-07	August	2017	Warthog	2		2	A
2017-08-08	August	2017	Elephant	2		2	A
2017-08-08	August	2017	Hyena	3	1	4	A
2017-08-09	August	2017	Elephant		2	2	A
2017-08-09	August	2017	Plains zebra	2		2	A
2017-08-10	August	2017	Hyena		1	1	A
2017-08-11	August	2017				0	A
2017-08-12	August	2017				0	A
2017-08-13	August	2017	Hyena	3		3	A
2017-08-13	August	2017	Impala	3		3	A
2017-08-13	August	2017	Plains zebra	3		3	A
2017-08-13	August	2017	White rhino		1	1	A
2017-08-14	August	2017				0	A
2017-08-15	August	2017	Hyena		2	2	A
2017-08-15	August	2017	Ostrich	2		2	A
2017-08-15	August	2017	White rhino		1	1	A
2017-08-16	August	2017				0	A
2017-08-17	August	2017				0	A
2017-08-18	August	2017	Plains zebra	3	3	6	A
2017-08-18	August	2017	White rhino		2	2	A
2017-08-19	August	2017	Waterbuck	1		1	A
2017-08-20	August	2017				0	A
2017-08-21	August	2017				0	A
2017-08-22	August	2017				0	A
2017-08-23	August	2017				0	A
2017-08-24	August	2017				0	A
2017-08-25	August	2017				0	A
2017-08-26	August	2017				0	A
2017-08-27	August	2017				0	A
2017-08-28	August	2017				0	A
2017-08-29	August	2017				0	A
2017-08-30	August	2017	Eland	2		2	A
2017-08-31	August	2017				0	A

## Sheet: All
Date	Month	Year	Species	To Lewa	To Borana	TOTAL	B or A	1 or 2	Species code
2016-06-03	June	2016	Black Rhino		1	1	A	2	1
2016-07-07	July	2016	Black Rhino		1	1	A	2	1
2016-07-09	July	2016	Black Rhino	1	1	2	A	2	1
2016-08-31	August	2016	Black Rhino	1		1	A	2	1
2016-09-06	September	2016	Black Rhino	1		1	A	2	1
2016-12-09	December	2016	Black Rhino	2		2	A	2	1
2016-12-11	December	2016	Black Rhino	1	1	2	A	2	1
2017-01-24	January	2017	Black Rhino		1	1	A	2	1
2017-01-25	January	2017	Black Rhino	1		1	A	2	1
2017-03-13	March	2017	Black Rhino	1		1	A	2	1
2017-03-16	March	2017	Black Rhino	1		1	A	2	1
2017-03-17	March	2017	Black Rhino	1		1	A	2	1
2017-03-18	March	2017	Black Rhino	1		1	A	2	1
2017-03-23	March	2017	Black Rhino		3	3	A	2	1
2017-03-24	March	2017	Black Rhino	3		3	A	2	1
2017-03-27	March	2017	Black Rhino	2		2	A	2	1
2017-03-27	March	2017	Black Rhino		1	1	A	2	1
2017-04-01	April	2017	Black Rhino		1	1	A	2	1
2016-02-09	February	2016	Buffalo	10	5	15	A	2	2
2016-02-10	February	2016	Buffalo	5	10	15	A	2	2
2016-02-11	February	2016	Buffalo	14		14	A	2	2
2016-03-29	March	2016	Buffalo	1		1	A	2	2
2016-04-27	April	2016	Buffalo	1		1	A	2	2
2016-05-07	hMay	2016	Buffalo		16	16	A	2	2
2016-05-17	hMay	2016	Buffalo	7		7	A	2	2
2016-06-03	June	2016	Buffalo		39	39	A	2	2
2016-06-05	June	2016	Buffalo	35		35	A	2	2
2016-06-13	June	2016	Buffalo	1		1	A	2	2
2016-07-19	July	2016	Buffalo	1		1	A	2	2
2016-10-27	October	2016	Buffalo		3	3	A	2	2
2016-10-28	October	2016	Buffalo	9		9	A	2	2
2016-10-29	October	2016	Buffalo	7		7	A	2	2
2017-02-03	February	2017	Buffalo	4		4	A	2	2
2017-04-10	April	2017	Buffalo	20		20	A	2	2
2017-04-13	April	2017	Buffalo		80	80	A	2	2
2013-10-12	October	2013	Bushbuck	1	1	2	B	1	3
2017-05-07	May	2017	Bushbuck		1	1	A	2	3
2017-05-08	May	2017	Bushbuck		2	2	A	2	3
2017-08-01	August	2017	Bushbuck	1		1	A	2	3
2013-12-17	December	2013	Caracal		1	1	B	1	4
2014-07-13	July	2014	Cheetah		1	1	B	1	5
2013-06-13	June	2013	Duiker	1	1	2	B	1	6
2013-02-19	February	2013	Eland		1	1	B	1	7
2013-04-22	April	2013	Eland	1		1	B	1	7
2013-04-25	April	2013	Eland	1		1	B	1	7
2013-04-27	April	2013	Eland		1	1	B	1	7
2013-04-29	April	2013	Eland	1		1	B	1	7
2013-06-14	June	2013	Eland		1	1	B	1	7
2013-06-15	June	2013	Eland	1	1	2	B	1	7
2013-06-22	June	2013	Eland		1	1	B	1	7
2013-06-23	June	2013	Eland		1	1	B	1	7
2013-07-20	July	2013	Eland	1		1	B	1	7
2013-07-23	July	2013	Eland		1	1	B	1	7
2013-09-26	September	2013	Eland	1		1	B	1	7
2013-10-12	October	2013	Eland	1	1	2	B	1	7
2013-10-18	October	2013	Eland		1	1	B	1	7
2013-10-20	October	2013	Eland	1		1	B	1	7
2013-10-30	October	2013	Eland		1	1	B	1	7
2013-11-09	November	2013	Eland	1	1	2	B	1	7
2013-11-17	November	2013	Eland	1		1	B	1	7
2013-12-10	December	2013	Eland	2		2	B	1	7
2013-12-18	December	2013	Eland		3	3	B	1	7
2014-03-14	March	2014	Eland	1		1	B	1	7
2014-03-16	March	2014	Eland		1	1	B	1	7
2014-04-07	April	2014	Eland	1		1	B	1	7
2014-07-13	July	2014	Eland		1	1	B	1	7
2014-07-28	July	2014	Eland		1	1	B	1	7
2014-07-29	July	2014	Eland	1		1	B	1	7
2014-08-01	August	2014	Eland		1	1	B	1	7
2014-08-02	August	2014	Eland	1		1	B	1	7
2016-02-29	February	2016	Eland	1	1	2	A	2	7
2016-03-09	March	2016	Eland	1		1	A	2	7
2016-03-13	March	2016	Eland	1		1	A	2	7
2016-03-19	March	2016	Eland		1	1	A	2	7
2016-03-30	March	2016	Eland	2	8	10	A	2	7
2016-04-06	April	2016	Eland	10		10	A	2	7
2016-04-09	April	2016	Eland		2	2	A	2	7
2016-04-29	April	2016	Eland		3	3	A	2	7
2016-05-04	hMay	2016	Eland		5	5	A	2	7
2016-05-05	hMay	2016	Eland	1	1	2	A	2	7
2016-05-31	hMay	2016	Eland	5		5	A	2	7
2016-10-22	October	2016	Eland	5		5	A	2	7
2016-10-27	October	2016	Eland		1	1	A	2	7
2016-11-27	November	2016	Eland		4	4	A	2	7
2016-11-29	November	2016	Eland	4		4	A	2	7
2016-12-04	December	2016	Eland	7		7	A	2	7
2016-12-05	December	2016	Eland	4		4	A	2	7
2016-12-06	December	2016	Eland		3	3	A	2	7
2016-12-10	December	2016	Eland	7	2	9	A	2	7
2017-01-22	January	2017	Eland		1	1	A	2	7
2017-02-08	February	2017	Eland	1		1	A	2	7
2017-02-20	February	2017	Eland		1	1	A	2	7
2017-05-31	May	2017	Eland	10		10	A	2	7
2017-08-30	August	2017	Eland	2		2	A	2	7
2013-02-03	February	2013	Elephant	1	5	6	B	1	8
2013-02-17	February	2013	Elephant	3		3	B	1	8
2013-02-20	February	2013	Elephant		1	1	B	1	8
2013-02-21	February	2013	Elephant		1	1	B	1	8
2013-02-23	February	2013	Elephant		1	1	B	1	8
2013-02-26	February	2013	Elephant		4	4	B	1	8
2013-02-28	February	2013	Elephant	21	13	34	B	1	8
2013-03-01	March	2013	Elephant	19	20	39	B	1	8
2013-03-03	March	2013	Elephant	2		2	B	1	8
2013-03-08	March	2013	Elephant		6	6	B	1	8
2013-03-09	March	2013	Elephant		2	2	B	1	8
2013-03-10	March	2013	Elephant		1	1	B	1	8
2013-03-11	March	2013	Elephant		1	1	B	1	8
2013-03-12	March	2013	Elephant	2	2	4	B	1	8
2013-03-14	March	2013	Elephant	2	2	4	B	1	8
2013-03-15	March	2013	Elephant	1		1	B	1	8
2013-03-16	March	2013	Elephant	3		3	B	1	8
2013-03-27	March	2013	Elephant	1		1	B	1	8
2013-03-28	March	2013	Elephant	1		1	B	1	8
2013-03-29	March	2013	Elephant		1	1	B	1	8
2013-03-30	March	2013	Elephant	8		8	B	1	8
2013-04-09	April	2013	Elephant	1		1	B	1	8
2013-04-26	April	2013	Elephant		2	2	B	1	8
2013-05-19	May	2013	Elephant	1	1	2	B	1	8
2013-05-25	May	2013	Elephant	7	25	32	B	1	8
2013-05-26	May	2013	Elephant	7	16	23	B	1	8
2013-05-27	May	2013	Elephant	2	11	13	B	1	8
2013-05-28	May	2013	Elephant	1	7	8	B	1	8
2013-05-29	May	2013	Elephant	9	13	22	B	1	8
2013-05-30	May	2013	Elephant	3	7	10	B	1	8
2013-05-31	May	2013	Elephant	6	6	12	B	1	8
2013-06-01	June	2013	Elephant	21	1	22	B	1	8
2013-06-02	June	2013	Elephant		1	1	B	1	8
2013-06-04	June	2013	Elephant		9	9	B	1	8
2013-06-06	June	2013	Elephant		1	1	B	1	8
2013-06-07	June	2013	Elephant	1	1	2	B	1	8
2013-06-08	June	2013	Elephant	1		1	B	1	8
2013-06-10	June	2013	Elephant	1		1	B	1	8
2013-06-11	June	2013	Elephant	24	22	46	B	1	8
2013-06-13	June	2013	Elephant	1	10	11	B	1	8
2013-06-15	June	2013	Elephant	1		1	B	1	8
2013-06-22	June	2013	Elephant		4	4	B	1	8
2013-06-23	June	2013	Elephant	2		2	B	1	8
2013-06-24	June	2013	Elephant	1	1	2	B	1	8
2013-06-25	June	2013	Elephant	7		7	B	1	8
2013-06-26	June	2013	Elephant	1	1	2	B	1	8
2013-06-27	June	2013	Elephant		12	12	B	1	8
2013-06-28	June	2013	Elephant	3		3	B	1	8
2013-06-28	June	2013	Elephant	1		1	B	1	8
2013-06-29	June	2013	Elephant		2	2	B	1	8
2013-06-30	June	2013	Elephant	1		1	B	1	8
2013-07-01	July	2013	Elephant		1	1	B	1	8
2013-07-03	July	2013	Elephant		2	2	B	1	8
2013-07-04	July	2013	Elephant	19	17	36	B	1	8
2013-07-05	July	2013	Elephant	18	22	40	B	1	8
2013-07-06	July	2013	Elephant	4	10	14	B	1	8
2013-07-07	July	2013	Elephant	1	11	12	B	1	8
2013-07-07	July	2013	Elephant	21		21	B	1	8
2013-07-08	July	2013	Elephant	1	19	20	B	1	8
2013-07-10	July	2013	Elephant	19		19	B	1	8
2013-07-11	July	2013	Elephant	20	18	38	B	1	8
2013-07-12	July	2013	Elephant		1	1	B	1	8
2013-07-13	July	2013	Elephant	15	17	32	B	1	8
2013-07-16	July	2013	Elephant	1	20	21	B	1	8
2013-07-18	July	2013	Elephant		16	16	B	1	8
2013-07-20	July	2013	Elephant	16		16	B	1	8
2013-07-22	July	2013	Elephant		19	19	B	1	8
2013-07-24	July	2013	Elephant	22		22	B	1	8
2013-07-25	July	2013	Elephant	1	27	28	B	1	8
2013-07-26	July	2013	Elephant	22		22	B	1	8
2013-07-27	July	2013	Elephant		21	21	B	1	8
2013-07-28	July	2013	Elephant	11	3	14	B	1	8
2013-07-28	July	2013	Elephant		6	6	B	1	8
2013-08-04	August	2013	Elephant		2	2	B	1	8
2013-08-05	August	2013	Elephant	1	1	2	B	1	8
2013-08-11	August	2013	Elephant	4	4	8	B	1	8
2013-08-12	August	2013	Elephant		4	4	B	1	8
2013-08-13	August	2013	Elephant	5	1	6	B	1	8
2013-08-14	August	2013	Elephant	5	5	10	B	1	8
2013-08-15	August	2013	Elephant	4	3	7	B	1	8
2013-08-16	August	2013	Elephant	16	16	32	B	1	8
2013-08-18	August	2013	Elephant		10	10	B	1	8
2013-08-19	August	2013	Elephant	2		2	B	1	8
2013-08-20	August	2013	Elephant	7		7	B	1	8
2013-08-23	August	2013	Elephant	10		10	B	1	8
2013-08-24	August	2013	Elephant	16	10	26	B	1	8
2013-08-25	August	2013	Elephant	13	14	27	B	1	8
2013-08-27	August	2013	Elephant	12	12	24	B	1	8
2013-09-01	September	2013	Elephant		1	1	B	1	8
2013-09-04	September	2013	Elephant		1	1	B	1	8
2013-09-09	September	2013	Elephant		5	5	B	1	8
2013-09-10	September	2013	Elephant		6	6	B	1	8
2013-09-14	September	2013	Elephant	5		5	B	1	8
2013-09-15	September	2013	Elephant	1		1	B	1	8
2013-09-16	September	2013	Elephant		1	1	B	1	8
2013-09-17	September	2013	Elephant	14		14	B	1	8
2013-09-18	September	2013	Elephant	9	11	20	B	1	8
2013-09-19	September	2013	Elephant	2		2	B	1	8
2013-09-20	September	2013	Elephant	8		8	B	1	8
2013-09-21	September	2013	Elephant		7	7	B	1	8
2013-09-22	September	2013	Elephant	1		1	B	1	8
2013-09-25	September	2013	Elephant		12	12	B	1	8
2013-09-26	September	2013	Elephant		8	8	B	1	8
2013-09-27	September	2013	Elephant	1	3	4	B	1	8
2013-09-28	September	2013	Elephant		1	1	B	1	8
2013-09-28	September	2013	Elephant	2		2	B	1	8
2013-09-29	September	2013	Elephant	8	3	11	B	1	8
2013-09-30	September	2013	Elephant		8	8	B	1	8
2013-10-02	October	2013	Elephant		5	5	B	1	8
2013-10-06	October	2013	Elephant	1		1	B	1	8
2013-10-11	October	2013	Elephant	1		1	B	1	8
2013-10-12	October	2013	Elephant	26	1	27	B	1	8
2013-10-13	October	2013	Elephant	1		1	B	1	8
2013-10-14	October	2013	Elephant	35	11	46	B	1	8
2013-10-15	October	2013	Elephant	17	17	34	B	1	8
2013-10-16	October	2013	Elephant		21	21	B	1	8
2013-10-17	October	2013	Elephant	4		4	B	1	8
2013-10-18	October	2013	Elephant	5	1	6	B	1	8
2013-10-21	October	2013	Elephant	5		5	B	1	8
2013-10-27	October	2013	Elephant		6	6	B	1	8
2013-10-28	October	2013	Elephant		9	9	B	1	8
2013-10-30	October	2013	Elephant		2	2	B	1	8
2013-11-02	November	2013	Elephant	9		9	B	1	8
2013-11-03	November	2013	Elephant	3	5	8	B	1	8
2013-11-04	November	2013	Elephant		3	3	B	1	8
2013-11-05	November	2013	Elephant	1		1	B	1	8
2013-11-07	November	2013	Elephant	9		9	B	1	8
2013-11-11	November	2013	Elephant	7		7	B	1	8
2013-11-12	November	2013	Elephant	1	13	14	B	1	8
2013-11-13	November	2013	Elephant		3	3	B	1	8
2013-11-14	November	2013	Elephant	1		1	B	1	8
2013-11-16	November	2013	Elephant	1		1	B	1	8
2013-11-17	November	2013	Elephant	30		30	B	1	8
2013-11-22	November	2013	Elephant	1	1	2	B	1	8
2013-11-24	November	2013	Elephant	29	29	58	B	1	8
2013-12-02	December	2013	Elephant	2		2	B	1	8
2013-12-05	December	2013	Elephant	1		1	B	1	8
2013-12-12	December	2013	Elephant	1		1	B	1	8
2013-12-16	December	2013	Elephant	9		9	B	1	8
2013-12-18	December	2013	Elephant		10	10	B	1	8
2013-12-24	December	2013	Elephant	28	29	57	B	1	8
2014-01-18	January	2014	Elephant	1		1	B	1	8
2014-01-20	January	2014	Elephant	11	1	12	B	1	8
2014-01-21	January	2014	Elephant	10	1	11	B	1	8
2014-01-22	January	2014	Elephant	1	11	12	B	1	8
2014-01-25	January	2014	Elephant	1	18	19	B	1	8
2014-01-27	January	2014	Elephant	1		1	B	1	8
2014-01-28	January	2014	Elephant	5	27	32	B	1	8
2014-01-29	January	2014	Elephant	1	2	3	B	1	8
2014-02-02	February	2014	Elephant		1	1	B	1	8
2014-03-15	March	2014	Elephant		21	21	B	1	8
2014-03-17	March	2014	Elephant	11		11	B	1	8
2014-03-24	March	2014	Elephant	10		10	B	1	8
2014-03-29	March	2014	Elephant	10		10	B	1	8
2014-03-30	March	2014	Elephant	9		9	B	1	8
2014-03-31	March	2014	Elephant		10	10	B	1	8
2014-04-01	April	2014	Elephant	7	4	11	B	1	8
2014-04-06	April	2014	Elephant	1		1	B	1	8
2014-04-08	April	2014	Elephant	1		1	B	1	8
2014-04-16	April	2014	Elephant	1		1	B	1	8
2014-04-17	April	2014	Elephant	1	2	3	B	1	8
2014-04-18	April	2014	Elephant	18		18	B	1	8
2014-04-19	April	2014	Elephant	5	11	16	B	1	8
2014-04-23	April	2014	Elephant		9	9	B	1	8
2014-04-26	April	2014	Elephant	1	1	2	B	1	8
2014-04-29	April	2014	Elephant	11	1	12	B	1	8
2014-05-04	May	2014	Elephant	2	1	3	B	1	8
2014-05-04	May	2014	Elephant	2		2	B	1	8
2014-05-05	May	2014	Elephant	1		1	B	1	8
2014-05-08	May	2014	Elephant		1	1	B	1	8
2014-05-10	May	2014	Elephant		11	11	B	1	8
2014-05-11	May	2014	Elephant		13	13	B	1	8
2014-05-12	May	2014	Elephant		14	14	B	1	8
2014-05-13	May	2014	Elephant	1	7	8	B	1	8
2014-05-14	May	2014	Elephant	2	20	22	B	1	8
2014-05-15	May	2014	Elephant		2	2	B	1	8
2014-05-17	May	2014	Elephant	1		1	B	1	8
2014-05-18	May	2014	Elephant		3	3	B	1	8
2014-05-19	May	2014	Elephant	4	1	5	B	1	8
2014-05-20	May	2014	Elephant		17	17	B	1	8
2014-05-21	May	2014	Elephant	3	3	6	B	1	8
2014-05-22	May	2014	Elephant	16		16	B	1	8
2014-05-23	May	2014	Elephant	1		1	B	1	8
2014-05-24	May	2014	Elephant	15	27	42	B	1	8
2014-05-25	May	2014	Elephant	1	43	44	B	1	8
2014-05-26	May	2014	Elephant	11	14	25	B	1	8
2014-05-27	May	2014	Elephant	30	35	65	B	1	8
2014-05-28	May	2014	Elephant	16	17	33	B	1	8
2014-05-29	May	2014	Elephant	1		1	B	1	8
2014-05-30	May	2014	Elephant	12	22	34	B	1	8
2014-05-31	May	2014	Elephant	10	12	22	B	1	8
2014-06-01	June	2014	Elephant	17	20	37	B	1	8
2014-06-02	June	2014	Elephant		14	14	B	1	8
2014-06-03	June	2014	Elephant	1	4	5	B	1	8
2014-06-04	June	2014	Elephant	5	6	11	B	1	8
2014-06-05	June	2014	Elephant	6		6	B	1	8
2014-06-06	June	2014	Elephant	4	1	5	B	1	8
2014-06-15	June	2014	Elephant	1	1	2	B	1	8
2014-06-16	June	2014	Elephant	2	1	3	B	1	8
2014-06-19	June	2014	Elephant		1	1	B	1	8
2014-06-21	June	2014	Elephant		12	12	B	1	8
2014-06-23	June	2014	Elephant	17	7	24	B	1	8
2014-06-24	June	2014	Elephant	17		17	B	1	8
2014-07-04	July	2014	Elephant	2	2	4	B	1	8
2014-07-05	July	2014	Elephant	20	13	33	B	1	8
2014-07-06	July	2014	Elephant	21	17	38	B	1	8
2014-07-08	July	2014	Elephant	14	36	50	B	1	8
2014-07-09	July	2014	Elephant	12	30	42	B	1	8
2014-07-10	July	2014	Elephant	25	30	55	B	1	8
2014-07-11	July	2014	Elephant	6	5	11	B	1	8
2014-07-12	July	2014	Elephant	26	23	49	B	1	8
2014-07-13	July	2014	Elephant	22	23	45	B	1	8
2014-07-19	July	2014	Elephant	6	2	8	B	1	8
2014-07-20	July	2014	Elephant		12	12	B	1	8
2014-07-21	July	2014	Elephant		14	14	B	1	8
2014-07-22	July	2014	Elephant	23	1	24	B	1	8
2014-07-23	July	2014	Elephant	8	8	16	B	1	8
2014-07-26	July	2014	Elephant	48	21	69	B	1	8
2014-07-27	July	2014	Elephant	4	25	29	B	1	8
2014-07-28	July	2014	Elephant		27	27	B	1	8
2014-07-29	July	2014	Elephant	21		21	B	1	8
2014-07-30	July	2014	Elephant		1	1	B	1	8
2014-07-30	July	2014	Elephant	1		1	B	1	8
2014-08-02	August	2014	Elephant		1	1	B	1	8
2014-08-05	August	2014	Elephant	11		11	B	1	8
2014-08-06	August	2014	Elephant	5	15	20	B	1	8
2014-08-15	August	2014	Elephant	16		16	B	1	8
2014-08-16	August	2014	Elephant		19	19	B	1	8
2014-08-17	August	2014	Elephant	16	16	32	B	1	8
2014-08-18	August	2014	Elephant	6	7	13	B	1	8
2014-08-21	August	2014	Elephant	1		1	B	1	8
2014-08-24	August	2014	Elephant		24	24	B	1	8
2014-08-26	August	2014	Elephant	8		8	B	1	8
2014-08-28	August	2014	Elephant	1		1	B	1	8
2014-08-29	August	2014	Elephant	35		35	B	1	8
2014-08-30	August	2014	Elephant	1	7	8	B	1	8
2014-08-30	August	2014	Elephant	36	38	74	B	1	8
2014-08-31	August	2014	Elephant		3	3	B	1	8
2016-02-01	February	2016	Elephant	8	2	10	A	2	8
2016-02-02	February	2016	Elephant	2		2	A	2	8
2016-02-04	February	2016	Elephant		1	1	A	2	8
2016-02-06	February	2016	Elephant	1	1	2	A	2	8
2016-02-07	February	2016	Elephant		1	1	A	2	8
2016-02-09	February	2016	Elephant		1	1	A	2	8
2016-02-15	February	2016	Elephant		2	2	A	2	8
2016-02-26	February	2016	Elephant	19	1	20	A	2	8
2016-02-27	February	2016	Elephant	20	19	39	A	2	8
2016-03-09	March	2016	Elephant	1	1	2	A	2	8
2016-03-16	March	2016	Elephant	1		1	A	2	8
2016-03-25	March	2016	Elephant	8		8	A	2	8
2016-03-27	March	2016	Elephant	1	10	11	A	2	8
2016-04-07	April	2016	Elephant		1	1	A	2	8
2016-04-08	April	2016	Elephant	8	3	11	A	2	8
2016-04-09	April	2016	Elephant	2		2	A	2	8
2016-04-12	April	2016	Elephant	9		9	A	2	8
2016-04-14	April	2016	Elephant	5	6	11	A	2	8
2016-04-15	April	2016	Elephant	1	1	2	A	2	8
2016-04-18	April	2016	Elephant		11	11	A	2	8
2016-04-19	April	2016	Elephant		1	1	A	2	8
2016-04-22	April	2016	Elephant	3		3	A	2	8
2016-04-25	April	2016	Elephant	5	5	10	A	2	8
2016-04-25	April	2016	Elephant		7	7	A	2	8
2016-04-26	April	2016	Elephant		2	2	A	2	8
2016-04-27	April	2016	Elephant		1	1	A	2	8
2016-04-29	April	2016	Elephant	1		1	A	2	8
2016-05-03	hMay	2016	Elephant	8	5	13	A	2	8
2016-05-06	hMay	2016	Elephant		10	10	A	2	8
2016-05-07	hMay	2016	Elephant		2	2	A	2	8
2016-05-14	hMay	2016	Elephant	3	3	6	A	2	8
2016-05-15	hMay	2016	Elephant	1		1	A	2	8
2016-05-16	hMay	2016	Elephant		3	3	A	2	8
2016-05-22	hMay	2016	Elephant		1	1	A	2	8
2016-05-22	hMay	2016	Elephant	4		4	A	2	8
2016-05-25	hMay	2016	Elephant	11	6	17	A	2	8
2016-05-31	hMay	2016	Elephant		6	6	A	2	8
2016-06-05	June	2016	Elephant	6		6	A	2	8
2016-06-07	June	2016	Elephant	2	2	4	A	2	8
2016-06-08	June	2016	Elephant	1	2	3	A	2	8
2016-06-09	June	2016	Elephant		5	5	A	2	8
2016-06-10	June	2016	Elephant	2	2	4	A	2	8
2016-06-12	June	2016	Elephant		2	2	A	2	8
2016-06-13	June	2016	Elephant		2	2	A	2	8
2016-06-14	June	2016	Elephant	1	1	2	A	2	8
2016-06-20	June	2016	Elephant	6		6	A	2	8
2016-06-22	June	2016	Elephant	1	7	8	A	2	8
2016-06-23	June	2016	Elephant		2	2	A	2	8
2016-06-25	June	2016	Elephant	5	5	10	A	2	8
2016-06-27	June	2016	Elephant	3	21	24	A	2	8
2016-06-30	June	2016	Elephant		1	1	A	2	8
2016-07-01	July	2016	Elephant		5	5	A	2	8
2016-07-02	July	2016	Elephant	6	1	7	A	2	8
2016-07-03	July	2016	Elephant	1	1	2	A	2	8
2016-07-05	July	2016	Elephant	9	6	15	A	2	8
2016-07-07	July	2016	Elephant		2	2	A	2	8
2016-07-09	July	2016	Elephant		17	17	A	2	8
2016-07-13	July	2016	Elephant	10	6	16	A	2	8
2016-07-14	July	2016	Elephant	1		1	A	2	8
2016-07-18	July	2016	Elephant		2	2	A	2	8
2016-07-22	July	2016	Elephant		4	4	A	2	8
2016-07-23	July	2016	Elephant		1	1	A	2	8
2016-07-25	July	2016	Elephant	5	1	6	A	2	8
2016-07-26	July	2016	Elephant		1	1	A	2	8
2016-07-27	July	2016	Elephant		7	7	A	2	8
2016-07-28	July	2016	Elephant	1	11	12	A	2	8
2016-08-08	August	2016	Elephant		2	2	A	2	8
2016-08-14	August	2016	Elephant		5	5	A	2	8
2016-08-16	August	2016	Elephant		4	4	A	2	8
2016-09-12	September	2016	Elephant	1		1	A	2	8
2016-09-13	September	2016	Elephant	1	2	3	A	2	8
2016-09-17	September	2016	Elephant	1		1	A	2	8
2016-10-05	October	2016	Elephant	3		3	A	2	8
2016-10-12	October	2016	Elephant	1		1	A	2	8
2016-10-13	October	2016	Elephant		8	8	A	2	8
2016-10-14	October	2016	Elephant		3	3	A	2	8
2016-10-15	October	2016	Elephant	4		4	A	2	8
2016-10-17	October	2016	Elephant	2	8	10	A	2	8
2016-10-18	October	2016	Elephant		2	2	A	2	8
2016-10-22	October	2016	Elephant	5		5	A	2	8
2016-10-26	October	2016	Elephant	3	2	5	A	2	8
2016-10-28	October	2016	Elephant		6	6	A	2	8
2016-11-07	November	2016	Elephant	1		1	A	2	8
2016-11-09	November	2016	Elephant	1		1	A	2	8
2016-11-10	November	2016	Elephant	1		1	A	2	8
2016-11-11	November	2016	Elephant	1	2	3	A	2	8
2016-11-14	November	2016	Elephant	7		7	A	2	8
2016-11-15	November	2016	Elephant		5	5	A	2	8
2016-11-16	November	2016	Elephant	2		2	A	2	8
2016-11-21	November	2016	Elephant		11	11	A	2	8
2016-11-24	November	2016	Elephant	12	10	22	A	2	8
2016-11-29	November	2016	Elephant		9	9	A	2	8
2016-12-02	December	2016	Elephant	8		8	A	2	8
2016-12-06	December	2016	Elephant	3	5	8	A	2	8
2016-12-07	December	2016	Elephant	4		4	A	2	8
2017-01-07	January	2017	Elephant	1	2	3	A	2	8
2017-01-09	January	2017	Elephant	11		11	A	2	8
2017-01-17	January	2017	Elephant	1		1	A	2	8
2017-01-20	January	2017	Elephant	1		1	A	2	8
2017-01-22	January	2017	Elephant	1	6	7	A	2	8
2017-01-27	January	2017	Elephant		1	1	A	2	8
2017-01-28	January	2017	Elephant		4	4	A	2	8
2017-02-01	February	2017	Elephant		1	1	A	2	8
2017-02-18	February	2017	Elephant		1	1	A	2	8
2017-02-22	February	2017	Elephant		2	2	A	2	8
2017-02-23	February	2017	Elephant	1	1	2	A	2	8
2017-02-24	February	2017	Elephant		5	5	A	2	8
2017-02-26	February	2017	Elephant	1		1	A	2	8
2017-03-01	March	2017	Elephant	10	6	16	A	2	8
2017-03-03	March	2017	Elephant		10	10	A	2	8
2017-03-07	March	2017	Elephant	7		7	A	2	8
2017-03-10	March	2017	Elephant	15		15	A	2	8
2017-03-14	March	2017	Elephant		1	1	A	2	8
2017-03-17	March	2017	Elephant		1	1	A	2	8
2017-03-21	March	2017	Elephant	11		11	A	2	8
2017-03-25	March	2017	Elephant	1		1	A	2	8
2017-03-26	March	2017	Elephant	1		1	A	2	8
2017-03-31	March	2017	Elephant	1		1	A	2	8
2017-04-02	April	2017	Elephant	6	2	8	A	2	8
2017-04-06	April	2017	Elephant	23	1	24	A	2	8
2017-04-08	April	2017	Elephant	10		10	A	2	8
2017-04-10	April	2017	Elephant		3	3	A	2	8
2017-04-13	April	2017	Elephant	1		1	A	2	8
2017-04-22	April	2017	Elephant		2	2	A	2	8
2017-05-04	May	2017	Elephant	3		3	A	2	8
2017-05-06	May	2017	Elephant	1		1	A	2	8
2017-05-08	May	2017	Elephant	18		18	A	2	8
2017-05-09	May	2017	Elephant	1		1	A	2	8
2017-05-11	May	2017	Elephant	13		13	A	2	8
2017-05-22	May	2017	Elephant		7	7	A	2	8
2017-05-23	May	2017	Elephant		11	11	A	2	8
2017-05-24	May	2017	Elephant	2		2	A	2	8
2017-05-25	May	2017	Elephant		1	1	A	2	8
2017-05-28	May	2017	Elephant	1	17	18	A	2	8
2017-05-29	May	2017	Elephant		1	1	A	2	8
2017-05-31	May	2017	Elephant	2	3	5	A	2	8
2017-06-01	June	2017	Elephant		8	8	A	2	8
2017-06-02	June	2017	Elephant		1	1	A	2	8
2017-06-03	June	2017	Elephant	2		2	A	2	8
2017-06-05	June	2017	Elephant		3	3	A	2	8
2017-06-12	June	2017	Elephant	1		1	A	2	8
2017-06-15	June	2017	Elephant		2	2	A	2	8
2017-06-16	June	2017	Elephant	3	10	13	A	2	8
2017-06-17	June	2017	Elephant	12	2	14	A	2	8
2017-06-18	June	2017	Elephant		3	3	A	2	8
2017-06-19	June	2017	Elephant	2		2	A	2	8
2017-06-19	June	2017	Elephant		1	1	A	2	8
2017-06-20	June	2017	Elephant	1	1	2	A	2	8
2017-06-21	June	2017	Elephant	1	4	5	A	2	8
2017-06-25	June	2017	Elephant	1	1	2	A	2	8
2017-06-26	June	2017	Elephant	1	2	3	A	2	8
2017-07-01	July	2017	Elephant	7		7	A	2	8
2017-07-04	July	2017	Elephant	1		1	A	2	8
2017-07-05	July	2017	Elephant	4		4	A	2	8
2017-07-06	July	2017	Elephant	1	2	3	A	2	8
2017-07-07	July	2017	Elephant		3	3	A	2	8
2017-07-10	July	2017	Elephant	10		10	A	2	8
2017-07-11	July	2017	Elephant		3	3	A	2	8
2017-07-13	July	2017	Elephant		2	2	A	2	8
2017-07-17	July	2017	Elephant	1		1	A	2	8
2017-07-20	July	2017	Elephant		1	1	A	2	8
2017-07-24	July	2017	Elephant	2	2	4	A	2	8
2017-08-05	August	2017	Elephant		14	14	A	2	8
2017-08-08	August	2017	Elephant	2		2	A	2	8
2017-08-09	August	2017	Elephant		2	2	A	2	8
2013-02-18	February	2013	Giraffe	2		2	B	1	9
2013-03-04	March	2013	Giraffe		1	1	B	1	9
2013-04-06	April	2013	Giraffe	1		1	B	1	9
2013-04-07	April	2013	Giraffe		1	1	B	1	9
2013-04-16	April	2013	Giraffe	1	1	2	B	1	9
2013-04-17	April	2013	Giraffe	1	1	2	B	1	9
2013-04-18	April	2013	Giraffe	1	1	2	B	1	9
2013-04-19	April	2013	Giraffe	1	1	2	B	1	9
2013-04-20	April	2013	Giraffe	2	2	4	B	1	9
2013-04-21	April	2013	Giraffe		2	2	B	1	9
2013-05-02	May	2013	Giraffe		1	1	B	1	9
2013-05-18	May	2013	Giraffe	1		1	B	1	9
2013-06-24	June	2013	Giraffe	1		1	B	1	9
2013-06-25	June	2013	Giraffe	2	1	3	B	1	9
2013-07-02	July	2013	Giraffe	1		1	B	1	9
2013-07-21	July	2013	Giraffe	1		1	B	1	9
2013-08-04	August	2013	Giraffe		1	1	B	1	9
2013-08-20	August	2013	Giraffe	1		1	B	1	9
2013-08-24	August	2013	Giraffe	1	2	3	B	1	9
2013-09-13	September	2013	Giraffe	1		1	B	1	9
2013-09-24	September	2013	Giraffe		1	1	B	1	9
2013-10-07	October	2013	Giraffe	1		1	B	1	9
2013-10-10	October	2013	Giraffe		1	1	B	1	9
2013-11-15	November	2013	Giraffe	1		1	B	1	9
2013-11-21	November	2013	Giraffe		1	1	B	1	9
2013-11-24	November	2013	Giraffe	1		1	B	1	9
2013-12-09	December	2013	Giraffe	1		1	B	1	9
2013-12-11	December	2013	Giraffe		1	1	B	1	9
2013-12-24	December	2013	Giraffe	1		1	B	1	9
2014-01-18	January	2014	Giraffe	1		1	B	1	9
2014-02-02	February	2014	Giraffe	1	1	2	B	1	9
2014-03-12	March	2014	Giraffe	1		1	B	1	9
2014-03-29	March	2014	Giraffe	1		1	B	1	9
2014-03-31	March	2014	Giraffe		1	1	B	1	9
2014-04-06	April	2014	Giraffe	2		2	B	1	9
2014-04-08	April	2014	Giraffe		1	1	B	1	9
2014-04-14	April	2014	Giraffe	1	2	3	B	1	9
2014-04-15	April	2014	Giraffe		1	1	B	1	9
2014-04-18	April	2014	Giraffe	1		1	B	1	9
2014-04-26	April	2014	Giraffe	1		1	B	1	9
2014-04-29	April	2014	Giraffe		1	1	B	1	9
2014-04-30	April	2014	Giraffe	1		1	B	1	9
2014-05-07	May	2014	Giraffe		1	1	B	1	9
2014-05-08	May	2014	Giraffe		1	1	B	1	9
2014-06-01	June	2014	Giraffe	1		1	B	1	9
2014-06-04	June	2014	Giraffe	1	1	2	B	1	9
2014-06-05	June	2014	Giraffe		2	2	B	1	9
2014-06-06	June	2014	Giraffe		1	1	B	1	9
2014-06-07	June	2014	Giraffe	3		3	B	1	9
2014-06-16	June	2014	Giraffe	1		1	B	1	9
2014-06-27	June	2014	Giraffe	1	2	3	B	1	9
2014-06-30	June	2014	Giraffe	1		1	B	1	9
2014-08-05	August	2014	Giraffe	2	1	3	B	1	9
2014-08-06	August	2014	Giraffe		1	1	B	1	9
2014-08-15	August	2014	Giraffe	1		1	B	1	9
2014-08-16	August	2014	Giraffe		1	1	B	1	9
2014-08-19	August	2014	Giraffe	1		1	B	1	9
2014-08-30	August	2014	Giraffe	1		1	B	1	9
2016-03-11	March	2016	Giraffe	1		1	A	2	9
2016-03-19	March	2016	Giraffe		1	1	A	2	9
2016-03-25	March	2016	Giraffe	1	1	2	A	2	9
2016-04-23	April	2016	Giraffe	1	1	2	A	2	9
2016-04-24	April	2016	Giraffe		1	1	A	2	9
2016-05-04	hMay	2016	Giraffe	3	2	5	A	2	9
2016-05-13	hMay	2016	Giraffe	2	2	4	A	2	9
2016-05-16	hMay	2016	Giraffe	2	3	5	A	2	9
2016-05-18	hMay	2016	Giraffe	1		1	A	2	9
2016-05-19	hMay	2016	Giraffe	1		1	A	2	9
2016-05-21	hMay	2016	Giraffe		1	1	A	2	9
2016-05-22	hMay	2016	Giraffe	1	2	3	A	2	9
2016-05-23	hMay	2016	Giraffe		1	1	A	2	9
2016-05-30	hMay	2016	Giraffe	1	2	3	A	2	9
2016-06-08	June	2016	Giraffe	1	1	2	A	2	9
2016-07-04	July	2016	Giraffe	1		1	A	2	9
2016-07-18	July	2016	Giraffe	1		1	A	2	9
2016-07-25	July	2016	Giraffe	1		1	A	2	9
2016-08-06	August	2016	Giraffe		1	1	A	2	9
2016-08-13	August	2016	Giraffe		1	1	A	2	9
2016-08-13	August	2016	Giraffe	1		1	A	2	9
2016-08-21	August	2016	Giraffe	1	1	2	A	2	9
2016-09-03	September	2016	Giraffe		1	1	A	2	9
2016-09-04	September	2016	Giraffe	2	2	4	A	2	9
2016-09-11	September	2016	Giraffe		1	1	A	2	9
2016-09-17	September	2016	Giraffe		1	1	A	2	9
2016-10-01	October	2016	Giraffe		1	1	A	2	9
2016-10-05	October	2016	Giraffe		2	2	A	2	9
2016-10-13	October	2016	Giraffe		1	1	A	2	9
2016-10-19	October	2016	Giraffe		1	1	A	2	9
2016-10-22	October	2016	Giraffe	1		1	A	2	9
2016-11-02	November	2016	Giraffe		1	1	A	2	9
2016-11-20	November	2016	Giraffe		1	1	A	2	9
2016-11-25	November	2016	Giraffe	3		3	A	2	9
2016-11-26	November	2016	Giraffe		1	1	A	2	9
2016-12-02	December	2016	Giraffe	1		1	A	2	9
2017-01-07	January	2017	Giraffe	3		3	A	2	9
2017-01-08	January	2017	Giraffe	3		3	A	2	9
2017-01-09	January	2017	Giraffe	2		2	A	2	9
2017-01-10	January	2017	Giraffe	1		1	A	2	9
2017-01-12	January	2017	Giraffe	1	1	2	A	2	9
2017-01-22	January	2017	Giraffe		1	1	A	2	9
2017-02-02	February	2017	Giraffe	1		1	A	2	9
2017-02-05	February	2017	Giraffe		1	1	A	2	9
2017-02-14	February	2017	Giraffe	1	1	2	A	2	9
2017-02-15	February	2017	Giraffe		1	1	A	2	9
2017-03-03	March	2017	Giraffe		1	1	A	2	9
2017-03-30	March	2017	Giraffe	1		1	A	2	9
2017-04-22	April	2017	Giraffe	2		2	A	2	9
2017-04-23	April	2017	Giraffe	1		1	A	2	9
2017-05-09	May	2017	Giraffe	1		1	A	2	9
2017-05-13	May	2017	Giraffe	1		1	A	2	9
2017-05-15	May	2017	Giraffe	1		1	A	2	9
2017-05-18	May	2017	Giraffe	1		1	A	2	9
2017-06-01	June	2017	Giraffe		1	1	A	2	9
2017-06-02	June	2017	Giraffe	1		1	A	2	9
2017-06-12	June	2017	Giraffe	1		1	A	2	9
2017-06-17	June	2017	Giraffe		1	1	A	2	9
2017-06-24	June	2017	Giraffe	1		1	A	2	9
2017-07-02	July	2017	Giraffe		1	1	A	2	9
2017-07-07	July	2017	Giraffe	1		1	A	2	9
2017-07-14	July	2017	Giraffe		1	1	A	2	9
2017-07-18	July	2017	Giraffe	1	1	2	A	2	9
2017-07-19	July	2017	Giraffe		1	1	A	2	9
2017-07-26	July	2017	Giraffe		1	1	A	2	9
2016-11-06	November	2016	Grant Gazelle	3	1	4	A	2	10
2016-11-20	November	2016	Grant Gazelle		2	2	A	2	10
2016-11-28	November	2016	Grant Gazelle	1		1	A	2	10
2016-06-21	June	2016	Grevy's zebra	1		1	A	2	11
2017-03-26	March	2017	Grevy's zebra		1	1	A	2	11
2017-03-30	March	2017	Grevy's zebra	1	1	2	A	2	11
2017-06-01	June	2017	Grevy's zebra	1	2	3	A	2	11
2017-06-04	June	2017	Grevy's zebra	3	1	4	A	2	11
2017-06-15	June	2017	Grevy's zebra	2		2	A	2	11
2017-07-01	July	2017	Grevy's zebra	1		1	A	2	11
2016-06-24	June	2016	Hartebeest		1	1	A	2	12
2016-11-18	November	2016	Hartebeest	1		1	A	2	12
2013-02-04	February	2013	Hyena		4	4	B	1	13
2013-02-05	February	2013	Hyena		2	2	B	1	13
2013-02-18	February	2013	Hyena	8	5	13	B	1	13
2013-02-19	February	2013	Hyena		1	1	B	1	13
2013-02-19	February	2013	Hyena		1	1	B	1	13
2013-02-21	February	2013	Hyena		2	2	B	1	13
2013-02-23	February	2013	Hyena		4	4	B	1	13
2013-02-24	February	2013	Hyena		4	4	B	1	13
2013-02-25	February	2013	Hyena		1	1	B	1	13
2013-02-26	February	2013	Hyena	5		5	B	1	13
2013-02-28	February	2013	Hyena		2	2	B	1	13
2013-03-05	March	2013	Hyena	2		2	B	1	13
2013-03-08	March	2013	Hyena		1	1	B	1	13
2013-03-10	March	2013	Hyena	4	4	8	B	1	13
2013-03-12	March	2013	Hyena	3		3	B	1	13
2013-03-16	March	2013	Hyena	1		1	B	1	13
2013-03-23	March	2013	Hyena		2	2	B	1	13
2013-03-24	March	2013	Hyena	3		3	B	1	13
2013-03-27	March	2013	Hyena		1	1	B	1	13
2013-03-28	March	2013	Hyena		5	5	B	1	13
2013-03-30	March	2013	Hyena		2	2	B	1	13
2013-03-31	March	2013	Hyena	1	7	8	B	1	13
2013-04-04	April	2013	Hyena	1	2	3	B	1	13
2013-04-09	April	2013	Hyena		2	2	B	1	13
2013-04-17	April	2013	Hyena		1	1	B	1	13
2013-04-19	April	2013	Hyena	1	3	4	B	1	13
2013-04-20	April	2013	Hyena	1		1	B	1	13
2013-04-25	April	2013	Hyena		1	1	B	1	13
2013-04-26	April	2013	Hyena		2	2	B	1	13
2013-05-24	May	2013	Hyena		3	3	B	1	13
2013-05-27	May	2013	Hyena	3		3	B	1	13
2013-05-27	May	2013	Hyena		1	1	B	1	13
2013-05-28	May	2013	Hyena		1	1	B	1	13
2013-06-01	June	2013	Hyena		6	6	B	1	13
2013-06-01	June	2013	Hyena		1	1	B	1	13
2013-06-02	June	2013	Hyena	1	1	2	B	1	13
2013-06-04	June	2013	Hyena		2	2	B	1	13
2013-06-06	June	2013	Hyena	1		1	B	1	13
2013-06-07	June	2013	Hyena		1	1	B	1	13
2013-06-09	June	2013	Hyena	1		1	B	1	13
2013-06-24	June	2013	Hyena	2	2	4	B	1	13
2013-06-25	June	2013	Hyena		2	2	B	1	13
2013-06-28	June	2013	Hyena		1	1	B	1	13
2013-06-29	June	2013	Hyena	1	2	3	B	1	13
2013-07-03	July	2013	Hyena		1	1	B	1	13
2013-07-04	July	2013	Hyena	1		1	B	1	13
2013-07-13	July	2013	Hyena		1	1	B	1	13
2013-07-15	July	2013	Hyena		2	2	B	1	13
2013-07-18	July	2013	Hyena		1	1	B	1	13
2013-07-23	July	2013	Hyena		3	3	B	1	13
2013-07-26	July	2013	Hyena		1	1	B	1	13
2013-08-04	August	2013	Hyena		2	2	B	1	13
2013-08-06	August	2013	Hyena		2	2	B	1	13
2013-08-10	August	2013	Hyena	2	2	4	B	1	13
2013-08-11	August	2013	Hyena		1	1	B	1	13
2013-08-13	August	2013	Hyena		1	1	B	1	13
2013-08-16	August	2013	Hyena		1	1	B	1	13
2013-08-19	August	2013	Hyena	1		1	B	1	13
2013-08-23	August	2013	Hyena	1		1	B	1	13
2013-08-26	August	2013	Hyena	2	2	4	B	1	13
2013-08-28	August	2013	Hyena		2	2	B	1	13
2013-08-29	August	2013	Hyena	1		1	B	1	13
2013-08-31	August	2013	Hyena	1	1	2	B	1	13
2013-09-02	September	2013	Hyena	1		1	B	1	13
2013-09-09	September	2013	Hyena		1	1	B	1	13
2013-09-10	September	2013	Hyena		1	1	B	1	13
2013-09-14	September	2013	Hyena		1	1	B	1	13
2013-09-22	September	2013	Hyena		1	1	B	1	13
2013-09-26	September	2013	Hyena		2	2	B	1	13
2013-09-28	September	2013	Hyena	4	2	6	B	1	13
2013-09-30	September	2013	Hyena		2	2	B	1	13
2013-10-01	October	2013	Hyena		2	2	B	1	13
2013-10-08	October	2013	Hyena	2		2	B	1	13
2013-10-09	October	2013	Hyena		1	1	B	1	13
2013-10-10	October	2013	Hyena		1	1	B	1	13
2013-10-11	October	2013	Hyena		1	1	B	1	13
2013-10-18	October	2013	Hyena	1		1	B	1	13
2013-11-03	November	2013	Hyena	1		1	B	1	13
2013-11-07	November	2013	Hyena		1	1	B	1	13
2013-11-14	November	2013	Hyena		4	4	B	1	13
2013-11-15	November	2013	Hyena	4	4	8	B	1	13
2013-11-16	November	2013	Hyena	12	14	26	B	1	13
2013-11-21	November	2013	Hyena		1	1	B	1	13
2013-11-22	November	2013	Hyena		1	1	B	1	13
2013-11-26	November	2013	Hyena	1		1	B	1	13
2013-12-04	December	2013	Hyena		1	1	B	1	13
2013-12-07	December	2013	Hyena		1	1	B	1	13
2013-12-11	December	2013	Hyena		1	1	B	1	13
2013-12-12	December	2013	Hyena	2	2	4	B	1	13
2013-12-13	December	2013	Hyena		1	1	B	1	13
2013-12-18	December	2013	Hyena		2	2	B	1	13
2013-12-26	December	2013	Hyena	1		1	B	1	13
2014-01-21	January	2014	Hyena	1		1	B	1	13
2014-01-24	January	2014	Hyena		2	2	B	1	13
2014-01-25	January	2014	Hyena		1	1	B	1	13
2014-01-26	January	2014	Hyena		1	1	B	1	13
2014-03-16	March	2014	Hyena	1	2	3	B	1	13
2014-03-19	March	2014	Hyena	1	2	3	B	1	13
2014-03-20	March	2014	Hyena	2	2	4	B	1	13
2014-03-21	March	2014	Hyena		1	1	B	1	13
2014-03-24	March	2014	Hyena		3	3	B	1	13
2014-03-31	March	2014	Hyena		1	1	B	1	13
2014-04-01	April	2014	Hyena		2	2	B	1	13
2014-04-06	April	2014	Hyena		1	1	B	1	13
2014-04-11	April	2014	Hyena	2	2	4	B	1	13
2014-05-06	May	2014	Hyena		1	1	B	1	13
2014-05-08	May	2014	Hyena	2	2	4	B	1	13
2014-05-09	May	2014	Hyena		2	2	B	1	13
2014-05-10	May	2014	Hyena		1	1	B	1	13
2014-05-11	May	2014	Hyena	1		1	B	1	13
2014-05-20	May	2014	Hyena		2	2	B	1	13
2014-06-03	June	2014	Hyena	3	3	6	B	1	13
2014-06-05	June	2014	Hyena		4	4	B	1	13
2014-06-06	June	2014	Hyena	1	2	3	B	1	13
2014-06-07	June	2014	Hyena	5	1	6	B	1	13
2014-06-16	June	2014	Hyena		1	1	B	1	13
2014-06-19	June	2014	Hyena	1		1	B	1	13
2014-06-20	June	2014	Hyena		1	1	B	1	13
2014-06-21	June	2014	Hyena	1	3	4	B	1	13
2014-06-22	June	2014	Hyena	1		1	B	1	13
2014-06-25	June	2014	Hyena	2		2	B	1	13
2014-06-26	June	2014	Hyena		1	1	B	1	13
2014-06-28	June	2014	Hyena		1	1	B	1	13
2014-06-29	June	2014	Hyena	1	5	6	B	1	13
2014-06-29	June	2014	Hyena	1		1	B	1	13
2014-06-30	June	2014	Hyena	4		4	B	1	13
2014-07-01	July	2014	Hyena	1		1	B	1	13
2014-07-04	July	2014	Hyena	1		1	B	1	13
2014-07-05	July	2014	Hyena	1	1	2	B	1	13
2014-07-06	July	2014	Hyena		2	2	B	1	13
2014-07-07	July	2014	Hyena	11	2	13	B	1	13
2014-07-09	July	2014	Hyena		1	1	B	1	13
2014-07-10	July	2014	Hyena	1	3	4	B	1	13
2014-07-11	July	2014	Hyena	1		1	B	1	13
2014-07-12	July	2014	Hyena		1	1	B	1	13
2014-07-17	July	2014	Hyena	1	2	3	B	1	13
2014-07-18	July	2014	Hyena		1	1	B	1	13
2014-07-19	July	2014	Hyena		2	2	B	1	13
2014-07-20	July	2014	Hyena	2	1	3	B	1	13
2014-07-21	July	2014	Hyena	2		2	B	1	13
2014-07-22	July	2014	Hyena		2	2	B	1	13
2014-07-26	July	2014	Hyena	1	2	3	B	1	13
2014-07-28	July	2014	Hyena		2	2	B	1	13
2014-07-29	July	2014	Hyena		1	1	B	1	13
2014-07-30	July	2014	Hyena	1	1	2	B	1	13
2014-08-02	August	2014	Hyena	5		5	B	1	13
2014-08-16	August	2014	Hyena		1	1	B	1	13
2014-08-17	August	2014	Hyena		2	2	B	1	13
2014-08-18	August	2014	Hyena	1	2	3	B	1	13
2014-08-19	August	2014	Hyena	2		2	B	1	13
2014-08-20	August	2014	Hyena		2	2	B	1	13
2014-08-22	August	2014	Hyena	1		1	B	1	13
2014-08-23	August	2014	Hyena	4	3	7	B	1	13
2014-08-24	August	2014	Hyena		1	1	B	1	13
2014-08-25	August	2014	Hyena	2		2	B	1	13
2014-08-27	August	2014	Hyena	1		1	B	1	13
2014-08-28	August	2014	Hyena		1	1	B	1	13
2014-08-29	August	2014	Hyena	1		1	B	1	13
2014-08-30	August	2014	Hyena	1		1	B	1	13
2014-08-30	August	2014	Hyena		2	2	B	1	13
2016-02-01	February	2016	Hyena		1	1	A	2	13
2016-02-03	February	2016	Hyena	1		1	A	2	13
2016-02-04	February	2016	Hyena		2	2	A	2	13
2016-02-10	February	2016	Hyena	1		1	A	2	13
2016-02-11	February	2016	Hyena	1	1	2	A	2	13
2016-02-15	February	2016	Hyena	1		1	A	2	13
2016-03-01	March	2016	Hyena	1		1	A	2	13
2016-03-09	March	2016	Hyena	1		1	A	2	13
2016-03-10	March	2016	Hyena	2	1	3	A	2	13
2016-03-11	March	2016	Hyena	2	2	4	A	2	13
2016-03-12	March	2016	Hyena	2	3	5	A	2	13
2016-03-14	March	2016	Hyena		1	1	A	2	13
2016-03-15	March	2016	Hyena		1	1	A	2	13
2016-03-17	March	2016	Hyena		1	1	A	2	13
2016-03-18	March	2016	Hyena	2	2	4	A	2	13
2016-03-19	March	2016	Hyena	1	1	2	A	2	13
2016-03-22	March	2016	Hyena	1		1	A	2	13
2016-03-23	March	2016	Hyena		2	2	A	2	13
2016-03-24	March	2016	Hyena		2	2	A	2	13
2016-03-25	March	2016	Hyena	2	1	3	A	2	13
2016-03-26	March	2016	Hyena	4		4	A	2	13
2016-03-27	March	2016	Hyena	1		1	A	2	13
2016-03-28	March	2016	Hyena	2	1	3	A	2	13
2016-03-30	March	2016	Hyena		1	1	A	2	13
2016-03-31	March	2016	Hyena	1		1	A	2	13
2016-04-01	April	2016	Hyena	1	1	2	A	2	13
2016-04-04	April	2016	Hyena	2		2	A	2	13
2016-04-06	April	2016	Hyena		2	2	A	2	13
2016-04-07	April	2016	Hyena		2	2	A	2	13
2016-04-08	April	2016	Hyena		5	5	A	2	13
2016-04-11	April	2016	Hyena		1	1	A	2	13
2016-04-15	April	2016	Hyena	1	2	3	A	2	13
2016-04-17	April	2016	Hyena	1		1	A	2	13
2016-04-22	April	2016	Hyena		2	2	A	2	13
2016-04-24	April	2016	Hyena		1	1	A	2	13
2016-04-25	April	2016	Hyena	1		1	A	2	13
2016-04-26	April	2016	Hyena		1	1	A	2	13
2016-04-27	April	2016	Hyena	1		1	A	2	13
2016-04-28	April	2016	Hyena	1	2	3	A	2	13
2016-04-30	April	2016	Hyena		3	3	A	2	13
2016-05-03	hMay	2016	Hyena	1		1	A	2	13
2016-05-05	hMay	2016	Hyena		3	3	A	2	13
2016-05-17	hMay	2016	Hyena		1	1	A	2	13
2016-05-19	hMay	2016	Hyena	1		1	A	2	13
2016-05-23	hMay	2016	Hyena		1	1	A	2	13
2016-05-25	hMay	2016	Hyena	2		2	A	2	13
2016-05-25	hMay	2016	Hyena		2	2	A	2	13
2016-05-26	hMay	2016	Hyena	1	1	2	A	2	13
2016-05-29	hMay	2016	Hyena		1	1	A	2	13
2016-06-02	June	2016	Hyena	1	2	3	A	2	13
2016-06-15	June	2016	Hyena	1		1	A	2	13
2016-06-21	June	2016	Hyena	11		11	A	2	13
2016-06-24	June	2016	Hyena	3		3	A	2	13
2016-06-26	June	2016	Hyena	1		1	A	2	13
2016-07-03	July	2016	Hyena		1	1	A	2	13
2016-07-04	July	2016	Hyena	3	1	4	A	2	13
2016-07-06	July	2016	Hyena		3	3	A	2	13
2016-07-08	July	2016	Hyena		10	10	A	2	13
2016-07-09	July	2016	Hyena	1	5	6	A	2	13
2016-07-14	July	2016	Hyena	1	1	2	A	2	13
2016-07-16	July	2016	Hyena		1	1	A	2	13
2016-07-17	July	2016	Hyena	2		2	A	2	13
2016-07-21	July	2016	Hyena	1		1	A	2	13
2016-07-26	July	2016	Hyena		4	4	A	2	13
2016-07-31	July	2016	Hyena		1	1	A	2	13
2016-08-06	August	2016	Hyena		1	1	A	2	13
2016-08-08	August	2016	Hyena		2	2	A	2	13
2016-08-12	August	2016	Hyena	1		1	A	2	13
2016-08-15	August	2016	Hyena		1	1	A	2	13
2016-08-16	August	2016	Hyena		1	1	A	2	13
2016-08-20	August	2016	Hyena	1	5	6	A	2	13
2016-09-01	September	2016	Hyena		1	1	A	2	13
2016-09-02	September	2016	Hyena	1	2	3	A	2	13
2016-09-04	September	2016	Hyena	1		1	A	2	13
2016-09-06	September	2016	Hyena	1		1	A	2	13
2016-09-08	September	2016	Hyena		2	2	A	2	13
2016-09-12	September	2016	Hyena		1	1	A	2	13
2016-09-14	September	2016	Hyena	3		3	A	2	13
2016-09-17	September	2016	Hyena	1		1	A	2	13
2016-09-21	September	2016	Hyena	1		1	A	2	13
2016-09-27	September	2016	Hyena		1	1	A	2	13
2016-10-05	October	2016	Hyena		1	1	A	2	13
2016-10-06	October	2016	Hyena	1		1	A	2	13
2016-10-09	October	2016	Hyena	1		1	A	2	13
2016-10-12	October	2016	Hyena	1	3	4	A	2	13
2016-10-15	October	2016	Hyena	1		1	A	2	13
2016-10-21	October	2016	Hyena		1	1	A	2	13
2016-10-30	October	2016	Hyena	3		3	A	2	13
2016-10-30	October	2016	Hyena	1		1	A	2	13
2016-10-31	October	2016	Hyena	2	3	5	A	2	13
2016-11-09	November	2016	Hyena	1		1	A	2	13
2016-11-16	November	2016	Hyena		1	1	A	2	13
2016-11-18	November	2016	Hyena	1	1	2	A	2	13
2016-11-20	November	2016	Hyena	1		1	A	2	13
2016-11-22	November	2016	Hyena	2		2	A	2	13
2016-11-25	November	2016	Hyena		1	1	A	2	13
2016-11-25	November	2016	Hyena		2	2	A	2	13
2016-11-28	November	2016	Hyena	1		1	A	2	13
2016-12-02	December	2016	Hyena	1		1	A	2	13
2016-12-05	December	2016	Hyena		1	1	A	2	13
2016-12-10	December	2016	Hyena		1	1	A	2	13
2016-12-15	December	2016	Hyena	1		1	A	2	13
2016-12-18	December	2016	Hyena	1	1	2	A	2	13
2017-01-04	January	2017	Hyena	1		1	A	2	13
2017-01-08	January	2017	Hyena	4		4	A	2	13
2017-01-10	January	2017	Hyena		2	2	A	2	13
2017-01-14	January	2017	Hyena		2	2	A	2	13
2017-01-18	January	2017	Hyena		1	1	A	2	13
2017-01-22	January	2017	Hyena	1		1	A	2	13
2017-01-23	January	2017	Hyena		1	1	A	2	13
2017-01-25	January	2017	Hyena	1	1	2	A	2	13
2017-02-05	February	2017	Hyena	1	2	3	A	2	13
2017-02-07	February	2017	Hyena	1		1	A	2	13
2017-02-13	February	2017	Hyena		1	1	A	2	13
2017-02-19	February	2017	Hyena	1		1	A	2	13
2017-02-20	February	2017	Hyena		1	1	A	2	13
2017-04-06	April	2017	Hyena		1	1	A	2	13
2017-05-07	May	2017	Hyena	1		1	A	2	13
2017-05-12	May	2017	Hyena		1	1	A	2	13
2017-05-13	May	2017	Hyena	1		1	A	2	13
2017-05-17	May	2017	Hyena	1		1	A	2	13
2017-05-18	May	2017	Hyena	9	5	14	A	2	13
2017-06-03	June	2017	Hyena	1		1	A	2	13
2017-06-14	June	2017	Hyena	1		1	A	2	13
2017-06-15	June	2017	Hyena		2	2	A	2	13
2017-07-07	July	2017	Hyena	2		2	A	2	13
2017-07-13	July	2017	Hyena	1		1	A	2	13
2017-07-14	July	2017	Hyena		1	1	A	2	13
2017-07-17	July	2017	Hyena	1		1	A	2	13
2017-08-08	August	2017	Hyena	3	1	4	A	2	13
2017-08-10	August	2017	Hyena		1	1	A	2	13
2017-08-13	August	2017	Hyena	3		3	A	2	13
2017-08-15	August	2017	Hyena		2	2	A	2	13
2013-12-17	December	2013	Impala	2		2	B	1	14
2017-08-13	August	2017	Impala	3		3	A	2	14
2014-06-07	June	2014	Jackal		2	2	B	1	15
2016-06-25	June	2016	Jackal		1	1	A	2	15
2017-01-16	January	2017	Jackal		1	1	A	2	15
2016-06-07	June	2016	Kudu	4	3	7	A	2	16
2016-10-05	October	2016	Kudu		4	4	A	2	16
2016-10-16	October	2016	Kudu	1	1	2	A	2	16
2016-11-05	November	2016	Kudu		4	4	A	2	16
2017-01-25	January	2017	Kudu	6		6	A	2	16
2017-02-15	February	2017	Kudu		4	4	A	2	16
2013-05-26	May	2013	Leopard		1	1	B	1	17
2013-06-07	June	2013	Leopard		1	1	B	1	17
2013-06-28	June	2013	Leopard		1	1	B	1	17
2013-07-03	July	2013	Leopard	1		1	B	1	17
2013-07-09	July	2013	Leopard	1		1	B	1	17
2013-07-23	July	2013	Leopard		1	1	B	1	17
2013-11-01	November	2013	Leopard	1		1	B	1	17
2013-11-02	November	2013	Leopard		1	1	B	1	17
2013-11-09	November	2013	Leopard		1	1	B	1	17
2013-11-23	November	2013	Leopard		1	1	B	1	17
2013-12-04	December	2013	Leopard		1	1	B	1	17
2014-01-19	January	2014	Leopard		1	1	B	1	17
2014-03-26	March	2014	Leopard	1		1	B	1	17
2014-08-06	August	2014	Leopard	1		1	B	1	17
2016-02-03	February	2016	Leopard		2	2	A	2	17
2016-02-27	February	2016	Leopard	1		1	A	2	17
2016-02-28	February	2016	Leopard	3	1	4	A	2	17
2016-03-01	March	2016	Leopard	1	2	3	A	2	17
2016-03-25	March	2016	Leopard		1	1	A	2	17
2016-04-29	April	2016	Leopard		1	1	A	2	17
2016-05-10	hMay	2016	Leopard	1	1	2	A	2	17
2016-05-16	hMay	2016	Leopard	1		1	A	2	17
2016-07-15	July	2016	Leopard	1		1	A	2	17
2016-07-20	July	2016	Leopard		1	1	A	2	17
2016-08-30	August	2016	Leopard	1		1	A	2	17
2016-10-18	October	2016	Leopard		1	1	A	2	17
2017-07-18	July	2017	Leopard		1	1	A	2	17
2017-08-01	August	2017	Leopard	1		1	A	2	17
2013-03-10	March	2013	Lion	1		1	B	1	18
2013-04-24	April	2013	Lion		1	1	B	1	18
2013-06-06	June	2013	Lion		2	2	B	1	18
2013-06-16	June	2013	Lion		1	1	B	1	18
2013-07-24	July	2013	Lion	1	3	4	B	1	18
2013-11-06	November	2013	Lion	1		1	B	1	18
2013-12-17	December	2013	Lion		2	2	B	1	18
2014-04-09	April	2014	Lion	2		2	B	1	18
2014-05-04	May	2014	Lion	1		1	B	1	18
2014-05-04	May	2014	Lion	1		1	B	1	18
2014-05-10	May	2014	Lion	1		1	B	1	18
2014-06-17	June	2014	Lion		1	1	B	1	18
2014-07-11	July	2014	Lion	2	2	4	B	1	18
2014-08-30	August	2014	Lion		1	1	B	1	18
2016-03-20	March	2016	Lion		2	2	A	2	18
2016-06-25	June	2016	Lion		1	1	A	2	18
2016-10-30	October	2016	Lion		1	1	A	2	18
2016-10-30	October	2016	Lion		1	1	A	2	18
2016-11-18	November	2016	Lion		11	11	A	2	18
2016-11-21	November	2016	Lion		5	5	A	2	18
2017-01-23	January	2017	Lion		11	11	A	2	18
2017-02-06	February	2017	Lion	1		1	A	2	18
2017-02-11	February	2017	Lion		2	2	A	2	18
2017-02-12	February	2017	Lion		3	3	A	2	18
2017-02-20	February	2017	Lion	2	3	5	A	2	18
2017-03-06	March	2017	Lion		7	7	A	2	18
2017-03-11	March	2017	Lion	1		1	A	2	18
2017-04-06	April	2017	Lion		6	6	A	2	18
2017-07-21	July	2017	Lion		1	1	A	2	18
2016-12-13	December	2016	Mongoose	1	1	2	A	2	19
2016-08-11	August	2016	Ostrich	1		1	A	2	20
2017-08-04	August	2017	Ostrich		1	1	A	2	20
2017-08-15	August	2017	Ostrich	2		2	A	2	20
2016-03-13	March	2016	Plains zebra	1		1	A	2	21
2016-03-19	March	2016	Plains zebra	7		7	A	2	21
2016-04-17	April	2016	Plains zebra		6	6	A	2	21
2016-04-26	April	2016	Plains zebra		8	8	A	2	21
2016-05-03	hMay	2016	Plains zebra	1		1	A	2	21
2016-05-05	hMay	2016	Plains zebra	3		3	A	2	21
2016-05-09	hMay	2016	Plains zebra		2	2	A	2	21
2016-05-10	hMay	2016	Plains zebra	6		6	A	2	21
2016-05-15	hMay	2016	Plains zebra	4		4	A	2	21
2016-05-16	hMay	2016	Plains zebra	3		3	A	2	21
2016-05-19	hMay	2016	Plains zebra	3		3	A	2	21
2016-05-21	hMay	2016	Plains zebra	2	1	3	A	2	21
2016-05-30	hMay	2016	Plains zebra	6	7	13	A	2	21
2016-06-01	June	2016	Plains zebra	4		4	A	2	21
2016-06-02	June	2016	Plains zebra	6		6	A	2	21
2016-06-07	June	2016	Plains zebra	6		6	A	2	21
2016-06-08	June	2016	Plains zebra		7	7	A	2	21
2016-06-09	June	2016	Plains zebra	8		8	A	2	21
2016-06-10	June	2016	Plains zebra	3		3	A	2	21
2016-06-30	June	2016	Plains zebra	4		4	A	2	21
2016-07-06	July	2016	Plains zebra		6	6	A	2	21
2016-07-13	July	2016	Plains zebra	4	4	8	A	2	21
2016-07-24	July	2016	Plains zebra		4	4	A	2	21
2016-08-09	August	2016	Plains zebra		1	1	A	2	21
2016-08-31	August	2016	Plains zebra	1		1	A	2	21
2016-09-06	September	2016	Plains zebra		6	6	A	2	21
2016-09-08	September	2016	Plains zebra		3	3	A	2	21
2016-09-12	September	2016	Plains zebra	2		2	A	2	21
2016-09-14	September	2016	Plains zebra		1	1	A	2	21
2016-09-17	September	2016	Plains zebra		4	4	A	2	21
2016-09-27	September	2016	Plains zebra		5	5	A	2	21
2016-10-04	October	2016	Plains zebra	4		4	A	2	21
2016-10-05	October	2016	Plains zebra		2	2	A	2	21
2016-10-08	October	2016	Plains zebra	26		26	A	2	21
2016-10-12	October	2016	Plains zebra		9	9	A	2	21
2016-10-24	October	2016	Plains zebra		5	5	A	2	21
2016-10-29	October	2016	Plains zebra		4	4	A	2	21
2016-10-31	October	2016	Plains zebra	4		4	A	2	21
2016-11-02	November	2016	Plains zebra	8	1	9	A	2	21
2016-11-03	November	2016	Plains zebra	3	11	14	A	2	21
2016-11-06	November	2016	Plains zebra		3	3	A	2	21
2016-11-14	November	2016	Plains zebra		6	6	A	2	21
2016-11-25	November	2016	Plains zebra	1		1	A	2	21
2016-11-28	November	2016	Plains zebra	4		4	A	2	21
2016-12-01	December	2016	Plains zebra	3	3	6	A	2	21
2016-12-11	December	2016	Plains zebra	1		1	A	2	21
2016-12-15	December	2016	Plains zebra	2	4	6	A	2	21
2016-12-18	December	2016	Plains zebra		2	2	A	2	21
2017-01-03	January	2017	Plains zebra		3	3	A	2	21
2017-01-07	January	2017	Plains zebra	6	5	11	A	2	21
2017-01-08	January	2017	Plains zebra	8		8	A	2	21
2017-01-17	January	2017	Plains zebra		3	3	A	2	21
2017-01-18	January	2017	Plains zebra		2	2	A	2	21
2017-01-19	January	2017	Plains zebra		3	3	A	2	21
2017-01-21	January	2017	Plains zebra	2		2	A	2	21
2017-01-25	January	2017	Plains zebra	3		3	A	2	21
2017-01-26	January	2017	Plains zebra		8	8	A	2	21
2017-02-09	February	2017	Plains zebra	4		4	A	2	21
2017-02-11	February	2017	Plains zebra		5	5	A	2	21
2017-02-12	February	2017	Plains zebra	16		16	A	2	21
2017-02-15	February	2017	Plains zebra		2	2	A	2	21
2017-03-04	March	2017	Plains zebra		1	1	A	2	21
2017-03-07	March	2017	Plains zebra	5		5	A	2	21
2017-03-10	March	2017	Plains zebra	5	3	8	A	2	21
2017-03-14	March	2017	Plains zebra	8		8	A	2	21
2017-03-30	March	2017	Plains zebra		9	9	A	2	21
2017-04-01	April	2017	Plains zebra		1	1	A	2	21
2017-05-03	May	2017	Plains zebra	3		3	A	2	21
2017-05-04	May	2017	Plains zebra	3		3	A	2	21
2017-05-13	May	2017	Plains zebra	1	1	2	A	2	21
2017-05-14	May	2017	Plains zebra	8		8	A	2	21
2017-05-23	May	2017	Plains zebra		2	2	A	2	21
2017-05-24	May	2017	Plains zebra		2	2	A	2	21
2017-05-25	May	2017	Plains zebra	1		1	A	2	21
2017-05-26	May	2017	Plains zebra		1	1	A	2	21
2017-05-26	May	2017	Plains zebra	2	7	9	A	2	21
2017-05-28	May	2017	Plains zebra		10	10	A	2	21
2017-05-29	May	2017	Plains zebra		12	12	A	2	21
2017-05-31	May	2017	Plains zebra		14	14	A	2	21
2017-06-01	June	2017	Plains zebra		5	5	A	2	21
2017-06-02	June	2017	Plains zebra	7		7	A	2	21
2017-06-03	June	2017	Plains zebra		2	2	A	2	21
2017-06-05	June	2017	Plains zebra	11		11	A	2	21
2017-06-06	June	2017	Plains zebra		11	11	A	2	21
2017-06-19	June	2017	Plains zebra	6		6	A	2	21
2017-08-03	August	2017	Plains zebra		2	2	A	2	21
2017-08-06	August	2017	Plains zebra		6	6	A	2	21
2017-08-09	August	2017	Plains zebra	2		2	A	2	21
2017-08-13	August	2017	Plains zebra	3		3	A	2	21
2017-08-18	August	2017	Plains zebra	3	3	6	A	2	21
2013-03-09	March	2013	Warthog	1		1	B	1	22
2016-06-10	June	2016	Warthog	1		1	A	2	22
2016-09-18	September	2016	Warthog	1		1	A	2	22
2016-10-02	October	2016	Warthog		1	1	A	2	22
2017-01-04	January	2017	Warthog		1	1	A	2	22
2017-07-03	July	2017	Warthog	1		1	A	2	22
2017-07-08	July	2017	Warthog		1	1	A	2	22
2017-07-10	July	2017	Warthog	1		1	A	2	22
2017-08-07	August	2017	Warthog	2		2	A	2	22
2013-02-23	February	2013	Waterbuck	1	2	3	B	1	23
2013-02-24	February	2013	Waterbuck	1	1	2	B	1	23
2013-02-27	February	2013	Waterbuck	1	2	3	B	1	23
2013-02-28	February	2013	Waterbuck	1		1	B	1	23
2013-03-01	March	2013	Waterbuck	1	1	2	B	1	23
2013-03-04	March	2013	Waterbuck	1	1	2	B	1	23
2013-03-05	March	2013	Waterbuck	2	2	4	B	1	23
2013-03-06	March	2013	Waterbuck	1	1	2	B	1	23
2013-03-07	March	2013	Waterbuck	1	1	2	B	1	23
2013-03-08	March	2013	Waterbuck	1	1	2	B	1	23
2013-03-09	March	2013	Waterbuck	2	1	3	B	1	23
2013-03-10	March	2013	Waterbuck	1		1	B	1	23
2013-03-12	March	2013	Waterbuck	2	2	4	B	1	23
2013-03-13	March	2013	Waterbuck	1	1	2	B	1	23
2013-03-15	March	2013	Waterbuck	2	2	4	B	1	23
2013-03-26	March	2013	Waterbuck		1	1	B	1	23
2013-03-27	March	2013	Waterbuck	1	1	2	B	1	23
2013-03-28	March	2013	Waterbuck	1		1	B	1	23
2013-03-30	March	2013	Waterbuck		1	1	B	1	23
2013-03-31	March	2013	Waterbuck	1		1	B	1	23
2013-04-07	April	2013	Waterbuck	2	2	4	B	1	23
2013-04-10	April	2013	Waterbuck	1	1	2	B	1	23
2013-04-11	April	2013	Waterbuck		1	1	B	1	23
2013-04-12	April	2013	Waterbuck	1		1	B	1	23
2013-04-14	April	2013	Waterbuck	1	1	2	B	1	23
2013-04-15	April	2013	Waterbuck	1	1	2	B	1	23
2013-04-16	April	2013	Waterbuck	1	1	2	B	1	23
2013-04-20	April	2013	Waterbuck	1		1	B	1	23
2013-04-22	April	2013	Waterbuck		1	1	B	1	23
2013-04-23	April	2013	Waterbuck	1		1	B	1	23
2013-05-02	May	2013	Waterbuck	1	1	2	B	1	23
2013-05-05	May	2013	Waterbuck	1	1	2	B	1	23
2013-05-18	May	2013	Waterbuck	1		1	B	1	23
2013-05-19	May	2013	Waterbuck		1	1	B	1	23
2013-05-22	May	2013	Waterbuck	1		1	B	1	23
2013-05-28	May	2013	Waterbuck	1	1	2	B	1	23
2013-05-30	May	2013	Waterbuck	1	1	2	B	1	23
2013-05-31	May	2013	Waterbuck	1	1	2	B	1	23
2013-06-01	June	2013	Waterbuck	2		2	B	1	23
2013-06-02	June	2013	Waterbuck	1		1	B	1	23
2013-06-03	June	2013	Waterbuck	1		1	B	1	23
2013-06-04	June	2013	Waterbuck	3		3	B	1	23
2013-06-05	June	2013	Waterbuck	1		1	B	1	23
2013-06-07	June	2013	Waterbuck	1	1	2	B	1	23
2013-06-13	June	2013	Waterbuck	5	3	8	B	1	23
2013-06-14	June	2013	Waterbuck		1	1	B	1	23
2013-06-15	June	2013	Waterbuck	1	1	2	B	1	23
2013-06-16	June	2013	Waterbuck	1		1	B	1	23
2013-06-22	June	2013	Waterbuck	2	1	3	B	1	23
2013-06-23	June	2013	Waterbuck	2		2	B	1	23
2013-06-30	June	2013	Waterbuck		1	1	B	1	23
2013-07-03	July	2013	Waterbuck	1		1	B	1	23
2013-07-05	July	2013	Waterbuck	3	3	6	B	1	23
2013-07-13	July	2013	Waterbuck	1	1	2	B	1	23
2013-07-19	July	2013	Waterbuck		1	1	B	1	23
2013-07-20	July	2013	Waterbuck	1		1	B	1	23
2013-07-22	July	2013	Waterbuck		1	1	B	1	23
2013-07-23	July	2013	Waterbuck	1		1	B	1	23
2013-07-27	July	2013	Waterbuck	1	1	2	B	1	23
2013-08-06	August	2013	Waterbuck		1	1	B	1	23
2013-08-14	August	2013	Waterbuck	1	1	2	B	1	23
2013-08-17	August	2013	Waterbuck		1	1	B	1	23
2013-08-18	August	2013	Waterbuck	2	2	4	B	1	23
2013-08-19	August	2013	Waterbuck	3	2	5	B	1	23
2013-08-26	August	2013	Waterbuck	1	1	2	B	1	23
2013-09-29	September	2013	Waterbuck	3	3	6	B	1	23
2013-09-30	September	2013	Waterbuck		1	1	B	1	23
2013-10-07	October	2013	Waterbuck	1	1	2	B	1	23
2013-10-16	October	2013	Waterbuck	1	1	2	B	1	23
2013-10-30	October	2013	Waterbuck	1		1	B	1	23
2013-11-01	November	2013	Waterbuck	1	1	2	B	1	23
2013-11-06	November	2013	Waterbuck	2	1	3	B	1	23
2013-11-10	November	2013	Waterbuck	1	1	2	B	1	23
2013-11-17	November	2013	Waterbuck		1	1	B	1	23
2013-11-18	November	2013	Waterbuck	4		4	B	1	23
2013-11-22	November	2013	Waterbuck	1		1	B	1	23
2013-11-26	November	2013	Waterbuck		1	1	B	1	23
2013-11-28	November	2013	Waterbuck	1	1	2	B	1	23
2013-12-03	December	2013	Waterbuck	3	1	4	B	1	23
2013-12-05	December	2013	Waterbuck		1	1	B	1	23
2013-12-08	December	2013	Waterbuck		2	2	B	1	23
2013-12-09	December	2013	Waterbuck	1	1	2	B	1	23
2013-12-10	December	2013	Waterbuck	1		1	B	1	23
2013-12-16	December	2013	Waterbuck		1	1	B	1	23
2013-12-18	December	2013	Waterbuck	1		1	B	1	23
2013-12-28	December	2013	Waterbuck	1	1	2	B	1	23
2014-01-20	January	2014	Waterbuck	2	2	4	B	1	23
2014-01-21	January	2014	Waterbuck		1	1	B	1	23
2014-01-22	January	2014	Waterbuck	1	1	2	B	1	23
2014-01-23	January	2014	Waterbuck	1	1	2	B	1	23
2014-01-24	January	2014	Waterbuck	1		1	B	1	23
2014-01-25	January	2014	Waterbuck		1	1	B	1	23
2014-01-25	January	2014	Waterbuck	1		1	B	1	23
2014-01-29	January	2014	Waterbuck	1	3	4	B	1	23
2014-01-30	January	2014	Waterbuck	1	1	2	B	1	23
2014-01-31	January	2014	Waterbuck	2		2	B	1	23
2014-02-01	February	2014	Waterbuck	1	1	2	B	1	23
2014-03-16	March	2014	Waterbuck	1	1	2	B	1	23
2014-03-23	March	2014	Waterbuck	1	1	2	B	1	23
2014-03-28	March	2014	Waterbuck	1	1	2	B	1	23
2014-04-06	April	2014	Waterbuck	1	1	2	B	1	23
2014-04-11	April	2014	Waterbuck		1	1	B	1	23
2014-04-12	April	2014	Waterbuck	1		1	B	1	23
2014-04-13	April	2014	Waterbuck	1	1	2	B	1	23
2014-04-15	April	2014	Waterbuck		1	1	B	1	23
2014-04-16	April	2014	Waterbuck	1		1	B	1	23
2014-04-18	April	2014	Waterbuck		1	1	B	1	23
2014-04-19	April	2014	Waterbuck	2	1	3	B	1	23
2014-04-24	April	2014	Waterbuck		1	1	B	1	23
2014-04-25	April	2014	Waterbuck	1	1	2	B	1	23
2014-04-26	April	2014	Waterbuck	1		1	B	1	23
2014-04-27	April	2014	Waterbuck	1	1	2	B	1	23
2014-04-29	April	2014	Waterbuck	1	1	2	B	1	23
2014-05-02	May	2014	Waterbuck		1	1	B	1	23
2014-05-03	May	2014	Waterbuck	1		1	B	1	23
2014-05-04	May	2014	Waterbuck	1		1	B	1	23
2014-05-05	May	2014	Waterbuck	3	1	4	B	1	23
2014-05-06	May	2014	Waterbuck	1	1	2	B	1	23
2014-05-07	May	2014	Waterbuck	1		1	B	1	23
2014-05-13	May	2014	Waterbuck	2	1	3	B	1	23
2014-05-15	May	2014	Waterbuck		1	1	B	1	23
2014-05-16	May	2014	Waterbuck	1		1	B	1	23
2014-05-22	May	2014	Waterbuck	1	1	2	B	1	23
2014-05-23	May	2014	Waterbuck	3	2	5	B	1	23
2014-05-24	May	2014	Waterbuck	1		1	B	1	23
2014-05-25	May	2014	Waterbuck	1		1	B	1	23
2014-05-26	May	2014	Waterbuck	1		1	B	1	23
2014-05-29	May	2014	Waterbuck	1		1	B	1	23
2014-06-02	June	2014	Waterbuck	1		1	B	1	23
2014-06-14	June	2014	Waterbuck		1	1	B	1	23
2014-06-15	June	2014	Waterbuck	1	1	2	B	1	23
2014-06-16	June	2014	Waterbuck	1		1	B	1	23
2014-06-17	June	2014	Waterbuck	1	1	2	B	1	23
2014-06-18	June	2014	Waterbuck	1		1	B	1	23
2014-06-19	June	2014	Waterbuck	1	1	2	B	1	23
2014-06-20	June	2014	Waterbuck		1	1	B	1	23
2014-06-21	June	2014	Waterbuck	2		2	B	1	23
2014-06-23	June	2014	Waterbuck	1	1	2	B	1	23
2014-06-24	June	2014	Waterbuck	2	2	4	B	1	23
2014-06-25	June	2014	Waterbuck	1		1	B	1	23
2014-06-27	June	2014	Waterbuck	3	2	5	B	1	23
2014-06-29	June	2014	Waterbuck		1	1	B	1	23
2014-06-30	June	2014	Waterbuck	2	1	3	B	1	23
2014-07-01	July	2014	Waterbuck		1	1	B	1	23
2014-07-02	July	2014	Waterbuck		1	1	B	1	23
2014-07-03	July	2014	Waterbuck	1	1	2	B	1	23
2014-07-04	July	2014	Waterbuck	1		1	B	1	23
2014-07-05	July	2014	Waterbuck	1	2	3	B	1	23
2014-07-06	July	2014	Waterbuck	1	1	2	B	1	23
2014-07-07	July	2014	Waterbuck	1		1	B	1	23
2014-07-08	July	2014	Waterbuck	1	2	3	B	1	23
2014-07-09	July	2014	Waterbuck	1		1	B	1	23
2014-07-10	July	2014	Waterbuck	1	1	2	B	1	23
2014-07-11	July	2014	Waterbuck	1		1	B	1	23
2014-07-12	July	2014	Waterbuck	1	2	3	B	1	23
2014-07-13	July	2014	Waterbuck	1		1	B	1	23
2014-07-15	July	2014	Waterbuck		1	1	B	1	23
2014-07-16	July	2014	Waterbuck	2	1	3	B	1	23
2014-07-17	July	2014	Waterbuck		2	2	B	1	23
2014-07-18	July	2014	Waterbuck	1	1	2	B	1	23
2014-07-20	July	2014	Waterbuck	2		2	B	1	23
2014-07-21	July	2014	Waterbuck		2	2	B	1	23
2014-07-22	July	2014	Waterbuck	1		1	B	1	23
2014-07-23	July	2014	Waterbuck	1	1	2	B	1	23
2014-07-24	July	2014	Waterbuck	1	1	2	B	1	23
2014-07-26	July	2014	Waterbuck		1	1	B	1	23
2014-07-27	July	2014	Waterbuck	1		1	B	1	23
2014-07-28	July	2014	Waterbuck		1	1	B	1	23
2014-07-29	July	2014	Waterbuck	1		1	B	1	23
2014-07-30	July	2014	Waterbuck		1	1	B	1	23
2014-07-31	July	2014	Waterbuck	1		1	B	1	23
2014-08-01	August	2014	Waterbuck		1	1	B	1	23
2014-08-02	August	2014	Waterbuck	1		1	B	1	23
2014-08-05	August	2014	Waterbuck		1	1	B	1	23
2014-08-06	August	2014	Waterbuck	1		1	B	1	23
2014-08-07	August	2014	Waterbuck	1		1	B	1	23
2014-08-15	August	2014	Waterbuck		2	2	B	1	23
2014-08-16	August	2014	Waterbuck	3	2	5	B	1	23
2014-08-17	August	2014	Waterbuck	1	1	2	B	1	23
2014-08-18	August	2014	Waterbuck	1	2	3	B	1	23
2014-08-19	August	2014	Waterbuck	1		1	B	1	23
2014-08-20	August	2014	Waterbuck		1	1	B	1	23
2014-08-21	August	2014	Waterbuck	1		1	B	1	23
2014-08-22	August	2014	Waterbuck	3	2	5	B	1	23
2014-08-23	August	2014	Waterbuck	2	1	3	B	1	23
2014-08-24	August	2014	Waterbuck	1	2	3	B	1	23
2014-08-25	August	2014	Waterbuck	1	1	2	B	1	23
2014-08-26	August	2014	Waterbuck		1	1	B	1	23
2014-08-27	August	2014	Waterbuck	1	1	2	B	1	23
2014-08-29	August	2014	Waterbuck	2	1	3	B	1	23
2014-08-31	August	2014	Waterbuck	1	1	2	B	1	23
2016-02-07	February	2016	Waterbuck		1	1	A	2	23
2016-03-23	March	2016	Waterbuck		1	1	A	2	23
2016-04-18	April	2016	Waterbuck		1	1	A	2	23
2016-04-24	April	2016	Waterbuck		2	2	A	2	23
2016-04-26	April	2016	Waterbuck	6		6	A	2	23
2016-04-29	April	2016	Waterbuck		1	1	A	2	23
2016-05-01	hMay	2016	Waterbuck		1	1	A	2	23
2016-05-03	hMay	2016	Waterbuck		1	1	A	2	23
2016-05-05	hMay	2016	Waterbuck	6		6	A	2	23
2016-05-06	hMay	2016	Waterbuck	5	5	10	A	2	23
2016-05-09	hMay	2016	Waterbuck	1		1	A	2	23
2016-05-10	hMay	2016	Waterbuck	1	12	13	A	2	23
2016-05-20	hMay	2016	Waterbuck	1		1	A	2	23
2016-05-21	hMay	2016	Waterbuck	3		3	A	2	23
2016-05-28	hMay	2016	Waterbuck		3	3	A	2	23
2016-09-06	September	2016	Waterbuck		2	2	A	2	23
2016-09-25	September	2016	Waterbuck		1	1	A	2	23
2016-11-07	November	2016	Waterbuck		5	5	A	2	23
2016-11-20	November	2016	Waterbuck		3	3	A	2	23
2017-01-16	January	2017	Waterbuck		1	1	A	2	23
2017-01-27	January	2017	Waterbuck	9		9	A	2	23
2017-02-05	February	2017	Waterbuck		2	2	A	2	23
2017-02-17	February	2017	Waterbuck	3		3	A	2	23
2017-04-22	April	2017	Waterbuck		6	6	A	2	23
2017-05-26	May	2017	Waterbuck		8	8	A	2	23
2017-05-28	May	2017	Waterbuck		1	1	A	2	23
2017-05-30	May	2017	Waterbuck	1	1	2	A	2	23
2017-06-02	June	2017	Waterbuck	1		1	A	2	23
2017-06-16	June	2017	Waterbuck		2	2	A	2	23
2017-07-21	July	2017	Waterbuck	2		2	A	2	23
2017-07-29	July	2017	Waterbuck	3		3	A	2	23
2017-08-19	August	2017	Waterbuck	1		1	A	2	23
2016-03-17	March	2016	White Rhino	2		2	A	2	24
2016-03-30	March	2016	White Rhino	1	1	2	A	2	24
2016-07-04	July	2016	White Rhino		1	1	A	2	24
2016-07-05	July	2016	White Rhino	1		1	A	2	24
2016-07-15	July	2016	White Rhino	1	1	2	A	2	24
2016-07-22	July	2016	White Rhino	1	1	2	A	2	24
2016-08-11	August	2016	White Rhino		1	1	A	2	24
2016-08-12	August	2016	White Rhino	1		1	A	2	24
2016-09-28	September	2016	White Rhino	1		1	A	2	24
2016-10-04	October	2016	White Rhino		1	1	A	2	24
2016-10-05	October	2016	White Rhino	1		1	A	2	24
2017-04-05	April	2017	White Rhino		1	1	A	2	24
2017-05-05	May	2017	White Rhino		1	1	A	2	24
2017-05-06	May	2017	White Rhino	1		1	A	2	24
2017-05-09	May	2017	White Rhino	1	1	2	A	2	24
2017-05-10	May	2017	White Rhino	2	1	3	A	2	24
2017-05-23	May	2017	White Rhino	1	1	2	A	2	24
2017-05-24	May	2017	White Rhino	1		1	A	2	24
2017-06-13	June	2017	White Rhino	1	1	2	A	2	24
2017-07-05	July	2017	White Rhino	1	1	2	A	2	24
2017-07-19	July	2017	White Rhino		1	1	A	2	24
2017-08-06	August	2017	White Rhino		1	1	A	2	24
2017-08-13	August	2017	White Rhino		1	1	A	2	24
2017-08-15	August	2017	White Rhino		1	1	A	2	24
2017-08-18	August	2017	White Rhino		2	2	A	2	24
2013-04-22	April	2013	Wilddog		4	4	B	1	25
2013-05-22	May	2013	Wilddog		7	7	B	1	25
2013-11-16	November	2013	Wilddog	9		9	B	1	25
2017-01-20	January	2017	Wilddog		1	1	A	2	25
2017-02-21	February	2017	Wilddog	8		8	A	2	25
2017-03-05	March	2017	Wilddog	8		8	A	2	25
2017-04-01	April	2017	Wilddog	9		9	A	2	25
