# Supplementary material for: A ghost fence-gap: surprising wildlife usage of an obsolete fence crossing
Source: PeerJ. 2018 Nov 27;6:e5950. doi: 10.7717/peerj.5950 (PMC6266906; doi:10.7717/peerj.5950)
Supplement: Supplemental Information 2 [file peerj-06-5950-s002.xlsx]

## Sheet: Mortality - 2013 - 2017
DATE	SPECIES	AREA	SEX	AGE	GPS X	GPS Y	CAUSE OF DEATH
2014-01-07	Plains zebra	Sussannah Rouse	Unknown	Adult	322.234	19.7	Killed by lion
2014-01-08	Buffalo	Milima	Male	Adult	328.9	24.2	Natural
2014-01-11	Plains zebra		Unknown	Adult			Killed by lion
2014-01-19	Grant's gazelle	Kivoko ya farasi	Unknown	Unkown	332.756	26.897	Killed by cheetah
2014-01-19	Plains zebra	Kisima gate	Unknown	Unkown	334.105	25.239	Killed by lion
2014-01-20	Waterbuck	Wilderness area	Unknown	Calf	333.567	26.754	Killed by lion
2014-01-26	Grevy's zebra	Mlima Twiga	Male	Adult	325.3	18.3	Killed by lion
2014-01-27	Grevy's zebra	Mtego ya twiga	Male	Adult	326.4	19.6	Killed by lion
2014-02-11	Waterbuck	Daraja ya wilderness	Male	Unkown	325.2	18.9	Killed by lion
2014-02-11	Giraffe	Dam ya Sambara	Male	Adult	331.5	28.1	Killed by lion
2014-02-15	Grevy's zebra	Boma ya ndomoko	Male	Adult	322.4	23.3	Unknown
2014-02-28	Plains zebra	Mlima Hewa	Male	Adult	320.7	27.3	Killed by lion
2014-03-01	Elephant	Isiolo Valley	Male	Adult	331.925	27.63	Natural
2014-03-05	Warthog	Airstrip	Female	Adult	329.098	22.536	Killed by lion
2014-03-05	Warthog	Airstrip	Male	Adult	329.098	22.536	Killed by lion
2014-03-07	Impala	Dam ya subuiga	Unknown	Unkown	327.6	19.4	Killed by cheetah
2014-03-27	Giraffe	Fumbi	Male	Sub-Adult	324.998	31.444	Killed by lion
2014-04-02	Giraffe	Willy Roberts	Male	Adult	325.916	22.242	Killed by lion
2014-04-02	Grevy's zebra	Mnanda ya Charlie	Unknown	Foal	326.13	18.948	Killed by lion
2014-04-04	Grevy's zebra	Mlima Lenjoro	Female	Adult	332.361	23.212	Killed by lion
2014-04-04	Grevy's zebra	Mlima Lenjoro	Unknown	Foal	332.361	23.212	Killed by lion
2014-04-10	Greater kudu	meza ya Leparua	Male	Adult	327.877	30.477	Killed by lion
2014-04-10	Grevy's zebra	Laga ya fisi	Unknown	Adult	327.73	20.447	Killed by lion
2014-04-12	Plains zebra	Morani	Female	Adult	323.026	30.42	Killed by lion
2014-04-14	Giraffe	Mlango ya ndovu	Male	Adult	330.5	31.3	Electrocution
2014-04-14	Plains zebra	Milima nugu	Female	Adult	331.188	27.231	Killed by lion
2014-04-18	Plains zebra	Dam ya fumbi	Unknown	Adult	324.844	29.062	Killed by lion
2014-04-18	Warthog	Dam ya fumbi	Male	Adult	324.819	29.076	Killed by lion
2014-04-19	Plains zebra	Lera ya cardown	Female	Sub-Adult	318.889	23.623	Killed by lion
2014-04-21	Grant's gazelle	Juu ya kisima ya kangauro	Female	Adult	322.595	26.979	Killed by lion
2014-04-21	Grevy's zebra	Milima william	Female	Adult	326.893	25.066	Killed by lion
2014-04-21	Plains zebra	Milima tangi	Female	Adult	320.27	24.072	Killed by lion
2014-04-22	Lion	Forest	Male	Adult	316.859	18.707	Unknown
2014-04-23	Plains zebra	Ngareniting house	Male	Adult	325.892	17.749	Killed by lion
2014-04-24	Impala	Ngiloriti ya kangauro	Male	Adult	323.167	26.38	Killed by lion
2014-04-24	Impala	Ngiloriti ya kangauro	Female	Adult	323.167	26.38	Killed by lion
2014-04-25	Impala	Luai ya karionga	Male	Adult	325.217	19.494	Killed by lion
2014-04-25	Warthog	Luai ya karionga	Unknown	Adult	325.203	19.235	Killed by lion
2014-04-28	Giraffe	Luai ya shamba	Unknown	Sub-Adult	319.983	25.093	Killed by lion
2014-05-05	Eland	Fumbi Plain	Female	Adult	324.849	29.076	Killed by lion
2014-05-05	Plains zebra	Fumbi ya juu	Female	Sub-Adult	325.66	28.315	Killed by lion
2014-05-07	Ostrich	Bosnia	Female	Adult	326.454	21.157	Killed by cheetah
2014-05-07	Plains zebra	Manyangalo gate	Male	Sub-Adult	325.351	20.085	Killed by lion
2014-05-07	Giraffe	Milima njora	Male	Sub-Adult	322.878	20.848	Killed by lion
2014-05-08	Unknown	Milima njora			322.845	22.468	Killed by lion
2014-05-08	Warthog	Bosnia	Female	Adult	325.302	21.377	Killed by lion
2014-05-09	Warthog	Daraja ya susana	Male	Adult	324.051	18.775	Killed by lion
2014-05-13	Plains zebra	Milima ngware	Male	Adult	320.631	28.867	Killed by lion
2014-05-14	Warthog	Bosnia	Female	Adult	325.575	21.375	Killed by lion
2014-05-16	Plains zebra	Digbys	Female	Adult	331.094	25.053	Killed by lion
2014-05-19	Grevy's zebra	Laga ya mwangi	Female	Adult	326.657	18.704	Killed by lion
2014-05-22	Buffalo	Laga ya simba	Female	Adult	323.081	29768	Killed by lion
2014-05-26	Impala	Luai ya Richard	Male	Adult	329.095	22.509	Killed by leopard
2014-05-28	Eland	Isiolo Valley	Male	Adult	331.173	29.071	Killed by lion
2014-05-28	Grevy's zebra	Mlango ya ndovu	Male	Adult	329.974	30.515	Killed by lion
2014-05-28	Plains zebra	Milima Tiim	Female	Adult	329.374	26.79	Killed by lion
2014-06-04	Grevy's zebra	Soboiga	Male	Adult	328.429	18.32	Killed by lion
2014-06-06	Plains zebra	Corner safi	Female	Sub-Adult	318.89	24.993	Killed by lion
2014-06-07	Plains zebra	Alan root	Female	Adult	322.662	22.342	Killed by lion
2014-06-09	Giraffe	Ndikir Ya shabaa	Unknown	Sub-Adult	321.909	29.818	Killed by lion
2014-06-09	Grevy's zebra	Soboiga	Unknown	Sub-Adult	328.362	19.404	Killed by lion
2014-06-09	Plains zebra	Boma Ya mungu	Female	Adult	326.15	25.816	Killed by lion
2014-06-09	Plains zebra	kifuko ya sirkoi	Unknown	Adult	325.987	25.579	Natural
2014-06-11	Eland	Alan root	Male	Sub-Adult	323.721	21.731	Killed by lion
2014-06-12	Plains zebra	Daraja ya wilderness	Male	Adult	332.136	25.615	killed by Lions
2014-06-12	Plains zebra	Milima nyeusi	Female	Adult	333.27	27.937	Killed by lion
2014-06-13	Oryx	Fumbi ya chini	Unknown	Calf	325.9	31.9	Killed by lion
2014-06-15	Buffalo	Susana rose house	Unknown	Calf	322.84	20.4	Killed by lion
2014-06-16	Grevy's zebra	Junction tano	Male	Adult	329.661	25.627	Killed by lion
2014-06-18	Grevy's zebra	Manyangalo gate	Unknown	Adult	325.598	20.257	Killed by lions
2014-06-19	Warthog	Luai ya karionga	Male	Adult	325.497	19.842	Killed by lion
2014-06-21	Grant's gazelle	Kivuko ya sirkoi	Female	Adult	326.7	23.2	Killed by cheetah
2014-06-24	Impala	Milima nyeusi	Male	Adult	333.747	27.576	Killed by lion
2014-07-01	Plains zebra	Luai Ya sambara	Female	Adult	330.334	30.043	Killed by lion
2014-07-02	Plains zebra	Milima Ian	Female	Adult	329.07	24.047	Killed by lions
2014-07-02	Plains zebra	Laga Ya sambara	Female	Sub-Adult	330.289	27.947	killed by Lions
2014-07-05	Impala	Mardadi camp	Female	Adult	328.428	21.245	Killed by lion
2014-07-06	Plains zebra	Matekenya	Female	Adult	327.133	22.675	Killed by lion
2014-07-06	Plains zebra	Matekenya	Female	Sub-Adult	327.133	22.675	Killed by lion
2014-07-07	Plains zebra	Milima tangi	Unknown	Adult	319.958	24.413	Killed by lion
2014-07-07	Grevy's zebra	Luai ya Charlie	Adult	Male	326.4	18.6	Killed by lion
2014-07-09	Plains zebra	Luai Ya sambara	Female	Adult	330.289	27.947	Killed by lion
2014-07-09	Plains zebra	Milima ngware	Female	Adult	320.208	29.132	Killed by lion
2014-07-09	Plains zebra	Luai ya Shamba	Adult	female	330.289	27.947	Killed by lion
2014-07-12	Impala	Mwarate ya Kathiari	Adult	Male	318.3	25	Killed by cheetah
2014-07-12	Plains zebra	Ukuta ya nyumba ya ian	Unknown	Adult	329.826	24.479	Killed by lion
2014-07-13	Plains zebra	Mlima Chorowa	Adult	Unknown	331.803	25.849	Killed by lion
2014-07-16	Plains zebra	Boma ya faro	Adult	female	325.644	18.749	Natural
2014-07-20	Grevy's zebra	Boma ya faro	Adult	female	325.644	18.749	Killed by lion
2014-07-20	Cheetah	Mlima Charlie	Adult	Unknown	318.2	20.7	Unknown
2014-07-22	Grevy's zebra	Near Junction Tano	Unknown	Adult	330.624	25.835	Killed by lion
2014-07-24	Waterbuck	Sanje Mbaya	Female	Adult	331.8	27.9	Killed by lion
2014-07-28	Plains zebra	Sambara Plains	Male	Adult	329.212	304.56	Killed by lion
2014-07-29	Cheetah	Laga ya Fisi	Male	Adult	327.324	19.363	Killed by lion
2014-07-30	Beisa Oryx	Edge of Swamp	Unknown	Foal	327.592	24.276	Killed by lion
2014-07-30	Waterbuck	Behind Mike's House	Male	Adult	328.67	23.2	Killed by lion
2014-07-31	Plains zebra	Mukora's Dam	Unknown	Foal	322.863	27.114	Killed by lion
2014-07-31	Plains zebra	Mukora's Dam	Unknown	Foal	322.276	27.626	Killed by lion
2014-07-31	Giraffe	Parking ya Willy Robert	Unknown	Foal	322.669	22.269	Killed by lion
2014-08-01	Eland	Edge of Swamp	Unknown	Foal	327.639	24.228	Killed by lion
2014-08-02	Plains zebra	Milima utalii	Female	Adult	331.4	28.9	Killed by lion
2014-08-03	Eland	Sirikoi	Male	Adult	325.739	23.593	Killed by lion
2014-08-04	Beisa Oryx	Mwarate ya Mkora	Unknown	Unknown	323.2	28.7	Killed by lion
2014-08-04	Plains zebra	Kangauro	Female	Sub-Adult	322.815	26.245	Killed by lion
2014-08-08	Impala	Marathon start	Female	Adult	327.9	21.71	Killed by cheetah
2014-08-08	Plains zebra	Milima mukora	Male	Adult	322.373	27.851	Killed by lion
2014-08-09	Plains zebra	Laga ya simba	Unknown	Unknown	322.9	28.9	Killed by lion
2014-08-12	Grevy's zebra	Marathon start	Male	Adult	328.39	22.128	Killed by lion
2014-08-15	Waterbuck	Chini ya boma faro	Young	Unknown	325.644	18.749	Killed by lion
2014-08-16	Giraffe	Juu ya kisima ya lewa	Female	Adult	327.876	21.081	Killed by lion
2014-08-17	Plains zebra	Mawe nyekundu ya leparua	Adult	female	328.237	30.897	Killed by lion
2014-08-18	Plains zebra	Milima simba	Adult	female	328.412	28.993	Killed by lion
2014-08-18	Impala	Matunda gate	Adult	female	332.2	19.1	Natural
2014-08-19	Ostrich	Milima mpopongi	Adult	female	322.432	22.878	Killed by cheetah
2014-08-19	Greater kudu	Ndadapoi	Adult	Female	327.564	29.947	Killed by lion
2014-08-20	Warthog	Ndadapoi	Adult	Male	327.475	29.909	Killed by lion
2014-08-25	Waterbuck	Boma ya faro	Adult	female	325.571	17.835	Killed by lion
2014-08-26	Plains zebra	Ngurunga	Sub-Adult	Male	330.952	25.14	Killed by lion
2014-08-27	Giraffe	Corner safi	Sub-Adult	Male	318.89	24.993	Killed by lion
2014-08-27	Plains zebra	Parking ya Willy Robert	Adult	female	322.669	22.269	Killed by lion
2014-08-28	Plains zebra	Fumbi	Adult	Male	324.269	31.2427	Killed by lion
2014-08-29	Impala	Sirikoi	Adult	Male	325.916	22.242	Killed by lion
2014-08-30	Warthog	Isiolo Valley	Adult	female	331.407	28.171	Killed by lion
2014-08-31	Beisa Oryx	Bosnia	Adult	female	326.454	21.157	Killed by lion
2014-09-01	Plains zebra	Miliuma loishimi	Unknown	Adult	322.499	24.891	Killed by lion
2014-09-02	Impala	Mlima rangi	Female	Adult	323.1	31.1	Killed by leopard
2014-09-03	Plains zebra	Isiolo Valley	Female	Sub-Adult	331.925	27.63	Electrocution
2014-09-04	Giraffe	Langata ya gitoonga	Female	Adult	326.084	27.429	Killed by lion
2014-09-08	Grevy's zebra	Mlima Mwitia	Female	Adult	324.8	32.432	Electrocution
2014-09-10	Plains zebra	Kangauro	Female	Adult	323.951	26.336	Killed by lion
2014-09-12	Beisa Oryx	Mbogani ya milima Lenchoro	Unknown	Sub-Adult	332.492	24.485	Killed by lion
2014-09-14	Grevy's zebra	Marania	Unknown	Adult	329.114	21.712	Killed by lion
2014-09-19	Plains zebra	Milima tanki	Unknown	Sub-Adult	320.341	23.778	Killed by lion
2014-09-29	Impala	Safaricom Village	Male	Adult	328.323	22.897	Natural
2014-09-30	Plains zebra	Mlima Mzungu	Unknown	Unknown	323.5	30.5	Killed by lion
2014-10-02	Warthog	Junction tano	Male	Adult	330194	25326	Killed by lion
2014-10-04	Plains zebra	Kivuko ya sirkoi	Unknown	Adult	326029	25131	Killed by lion
2014-10-06	Grevy's zebra	Corner ya manyangalo	Female	Adult	324118	19329	Killed by lion
2014-10-06	Grevy's zebra	Corner ya manyangalo	Unknown	Sub-Adult	324118	19329	Killed by lion
2014-10-15	Waterbuck	Milima Ian	Unknown	Adult	329342	24153	Killed by lion
2014-10-15	Eland	Ndikir Ya shabaa	Unknown	calf	323.5	30.5	Natural
2014-10-17	Buffalo	Corner ya manyangalo	Unknown	Adult	323.2	18.9	Killed by lion
2014-10-18	Plains zebra	Dam kubwa	Unknown	Sub-Adult	321965	25132	Killed by lion
2014-10-24	Giraffe	Mlima Mzungu	Female	Adult	323.5	30.5	Electrocution
2014-10-25	Plains zebra	Boma inne	calf	Unknown	319.788	26.987	Killed by lion
2014-10-26	Plains zebra	Corner safi	female	Adult	318.5	24	Killed by lion
2014-10-26	Impala	Safaricom Village	female	Unknown	331.4	28.9	Killed by lion
2014-10-28	Plains zebra	Mlima watalii	Unknown	Unknown	331.4	28.9	Killed by lion
2014-10-28	Grevy's zebra	Laga ya chui	female	Adult	323.9	28.9	Killed by lion
2014-11-03	Giraffe	rugusu road	Female	adult	331.654	19.897	Killed by lion
2014-11-05	Grevy's zebra	Sambara Plains	Female	Adult	329.741	26.229	Killed by lion
2014-11-05	Giraffe	Sirikoi river	Female	Adult	325.72	23.177	Killed by lion
2014-11-05	Plains zebra	Sambara Plains	Unknown	Adult	329.741	26.229	Killed by lion
2014-11-06	Grevy's zebra	Laga Ya sambara	Female	Adult	329.974	26.229	Killed by lion
2014-11-08	Impala	Isiolo Valley	Male	Adult	331.925	27.63	Killed by lion
2014-11-08	Beisa Oryx	Sirikoi Plain	Female	Adult	324.912	26.199	Killed by lion
2014-11-10	Waterbuck	Dam ya mogumo	Male	Adult	330.205	25.333	Killed by lion
2014-11-11	Impala	Headquarters	Male	Adult	328.124	21.655	Killed by lion
2014-11-12	Beisa Oryx	Sirikoi Plain	Unknown	Adult	324.893	26.3191	Killed by lion
2014-11-12	Warthog	Dam ya soboiga	Male	Adult	330.093	20.29	Killed by lion
2014-11-12	Giraffe	Milima kingi	Unknown	Sub-Adult	328.9	29.8	Killed by lion
2014-11-12	Warthog	Dam ya soboiga	Male	Adult	330.093	20.29	Killed by lion
2014-11-14	Plains zebra	Digbys	Male	Adult	330.319	24.833	Killed by lion
2014-11-16	Impala	Mardadi camp	Male	Adult	328.327	21.652	Killed by leopard
2014-11-18	Beisa Oryx	Matekenya	Unknown	Adult	326.802	21.598	Killed by cheetah
2014-11-18	Buffalo	Boma ya faro	Female	Adult	325.644	18.749	Natural
2014-11-18	Plains zebra	Dam ya charlie	Female	Sub-Adult	325.767	19.146	Natural
2014-11-20	Plains zebra	Milima tatu	Unknown	Adult	328.422	19.02	Killed by lion
2014-11-21	Impala	chemichemi ya mike	Female	Adult	328.949	23.192	Leopard
2014-11-21	Giraffe	Lomei	Unknown	Adult	324.8	32.oo	Unknown
2014-11-26	Plains zebra	Borana	Female	Adult	314.543	22.776	Killed by lion
2014-11-27	Waterbuck	Daraja ya Ian	Female	Adult	328.825	23.685	Killed by lion
2014-11-29	Plains zebra	Milima mkora	Male	Adult	323.2	28.7	Killed by lion
2014-11-30	Warthog	Mlango ya kiboo	Unknown	Adult	324.643	25.597	Killed by lion
2014-12-02	Impala	Luai ya mike	Male	Adult	328.983	22.487	Killed by lion
2014-12-03	Impala	Luai ya willyrobert	Male	Adult	324.281	22.096	Killed by lion
2014-12-03	Impala	Alan root	Female	Adult	324.058	21.903	Killed by lion
2014-12-04	Plains zebra	Borana	Female	Adult	311.286	26.169	Killed by lion
2014-12-06	Giraffe	Mnanda ya zamani	Adult	Unknown	331.925	27.63	Killed by lion
2014-12-06	Plains zebra	Luai ya karionga	Unknown	Sub-Adult	325.548	19.559	Killed by lion
2014-12-06	Giraffe	Isiolo Valley	Female	Adult	331.925	27.63	Killed by lion
2014-12-09	Eland	Kivuko ya sirkoi	Male	Adult	325.894	25.338	Killed by lion
2014-12-12	Giraffe	Milima loishimi	Unknown	Sub-Adult	321.462	23.36	Killed by lion
2014-12-12	Eland	Boma ya faro	Unknown	Sub-Adult	325648	17.805	Killed by lion
2014-12-14	Eland	Pigos camp	Male	Sub-Adult	318.2	28.9	Electrocution
2014-12-14	Waterbuck	Milima toiga	Male	Adult	324.784	18.978	Killed by lion
2014-12-14	Greater kudu	Mawingu gap	Male	Adult	318.411	27.494	Killed by lion
2014-12-15	Buffalo	Matekenya	Female	Adult	326.092	22.682	Killed by lion
2014-12-16	Grevy's zebra	Luai ya karionga	Unknown	Sub-Adult	318.369	24.886	Killed by lion
2014-12-16	Plains zebra	Borana	Unknown	Adult	307.638	28.501	Killed by lion
2014-12-19	Plains zebra	Borana	Unknown	Adult	308.229	28.042	Killed by lion
2014-12-20	Plains zebra	Mwarate kavu	Unknown	Adult	326.838	17.902	Killed by lion
2014-12-22	Plains zebra	Laga ya Fisi	Unknown	Unknown	327.324	19.363	Killed by lion
2014-12-24	Gerenuk	Shamba mrefu ya charlie	Female	Adult	326.4	18.6	Killed by lion
2014-12-25	Plains zebra	Misinga	Unknown	Adult	322.563	29.672	Killed by lion
2014-12-29	Giraffe	Mbogani ya milima Lenchoro	Male	Sub-Adult	332.492	24.485	Killed by lion
2014-12-29	Warthog	Milima lenjoro	Male	Adult	333.2	24.3	Killed by lion
2014-12-30	Eland	Mwarate ya Lopoko	Male	Adult	328.611	26.644	Killed by lion
2014-12-30	Plains zebra	Daraja ya wilderness	Male	Adult	332.505	26.118	Killed by lion
2015-01-01	Warthog	Airstrip	Female	Adult	330.077	21.485	Killed by lion
2015-01-01	Giraffe	Alanroot	Male	Sub-Adult	323.262	21.485	Killed by lion
2015-01-02	Giraffe	Parking ya Willyrobert	Male	Adult	334.2	26.1	Killed by lion
2015-01-10	Plains zebra	Boma ya ndumuku	Unknown	Adult	319.388	26.601	Unknown
2015-01-12	Waterbuck	Mardadi	Male	Adult	328.291	21.634	Killed by lion
2015-01-15	Plains zebra	Mbogani ya hewa	Unknown	Adult	320.598	26.435	Killed by lion
2015-01-17	Plains zebra	Headquarters	Male	Adult	328.861	21.583	Killed by lion
2015-01-24	Giraffe	Sirikoi swamp	Female	Adult	324.971	22.882	Natural
2015-01-24	Eland	Sirikoi swamp	Male	Sub-Adult	324.971	22.882	Killed by lion
2015-01-29	Eland	Matunda	Male	Sub-Adult	332.2	19.1	Killed by lion
2015-01-29	Buffalo	Sirkoi	Female	Adult	325.987	25.579	Killed by lion
2015-01-30	Impala	Karionga	Female	Adult	325.488	17.274	Killed by lion
2015-02-08	Grevy's zebra	Luai Nyekundu	Female	Adult	322.4	29.2	Natural
2015-02-12	Plains zebra	Luai ya Sambara	Male	Unknown	330.011	24.932	Killed by a lion
2015-02-18	Grevy's zebra	Kifuko ya Digbys	Female	Adult	330.542	24.987	Killed by a lion
2015-02-18	Grevy's zebra	Kifuko ya Digbys	Male	Adult	330.542	24.987	Killed by a lion
2015-02-18	Plains zebra	Laga ya Mwangi	Female	Sub-Adult	326.738	18.744	Killed by a lion
2015-02-18	Plains zebra	Digbys	Female	Unknown	330.542	24.987	Killed by a lion
2015-02-25	Plains zebra	Kiwanja ya Kariunga samani	Unknown	Unknown	325.9	20	Killed by a lion
2015-02-18	Plains zebra	Digbys	Female	Adult	330.542	24.987	Killed by a lion
2015-02-02	Eland	Karionga	Unknown	Sub-Adult	325.639	19.091	Killed by a lion
2015-02-01	Warthog	Shamba mrefu	Male	Adult	323.83	19.842	Killed by a lion
2015-02-27	Plains zebra	sagana ya juu	Female	Adult	326.811	27.061	Killed by a lion
2015-02-23	Giraffe	Matekenya	Male	Sub-Adult	328.334	23.89	Killed by a lion
2015-03-01	Plains zebra	Irmwaateni	Female	Adult	320.696	20.301	Killed by a lion
2015-03-01	Plains zebra	Irmwaateni	Female	Sub-Adult	320.681	20.272	Killed by a lion
2015-03-02	Buffalo	Maji ya Bob	Female	Adult	326.469	22.05	Natural
2015-03-03	Buffalo	Bom campsite	Male	Adult	326.998	22.345	Natural
2015-03-09	Buffalo	nyumba moja ya sirkoi	Female	Adult	324.538	28.467	Killed by a lion
2015-03-13	Hartebeest	Chini ya Mlima Ngware	Male	Calf	320.348	29.897	Natural
2015-03-14	Eland	Mlima Sinai	Unknown	Unknown	318.5	24	Killed by a lion
2015-03-17	Eland	Luai ya Ngare ndare	Calf	Female	318.674	20.751	Killed by a lion
2015-03-18	Warthog	Ngiroriti ya Matunda	Adult	Female	332.2	19.1	Killed by a lion
2015-03-21	Impala	Kifuko ya Digbys	Adult	Unknown	330.319	24.833	Killed by leopard
2015-03-24	Plains zebra	Kiwanja y a Mpira	Adult	Female	329.5	21.8	Kiwanja y a Mpira
2015-03-26	Impala	Dadaboi	Unknown	Unknown	328.025	29.28	Killed by hyena
2015-03-30	Buffalo	Kisima ya jakwai	Female	Adult	328.897	27.678	Killed by lion
2015-04-02	Eland	sirkoi	Female	Adult	325.342	22.899	Killed by lion
2015-04-02	Giraffe	Mlango ya ndovu	Male	Adult	330.5	31.3	Electrocution
2015-04-04	Giraffe	Mlango ya ndovu	Male	Adult	330.5	31.3	Electrocution
2015-04-06	Impala	Luai ya Ngare ndare	Male	Adult	318.674	20.751	Killed by cheetah
2015-04-13	Grevy's zebra	kifuko ya farasi	Male	Adult	331.89	25.588	Killed by lion
2015-04-14	Warthog	sirkoi	Male	Adult	326.463	24.808	Killed by lion
2015-04-15	Plains zebra	Milima william	Female	Adult	326.114	23.763	Killed by lion
2015-04-21	Impala	Daraja ya Ian	Male	Adult	329.043	23.624	Killed by lion
2015-04-23	Eland	Isiolo valley	Male	Adult	331.925	27.63	Killed by lion
2015-04-24	Waterbuck	Simba ridge	Male	Adult	330.27	22.105	Killed by lion
2015-05-05	Impala	Area ya charlie	Male	Adult	318.2	20.7	Electrocution
2015-05-06	Impala	Sirkoi	Male	Adult	325.692	23.727	Killed by lion
2015-05-08	Giraffe	Milima william	Unknown	Unknown	320.348	29.897	Killed by lion
2015-05-10	Giraffe	Sirkoi	Unknown	Sub-Adult	326.546	24.521	Killed by lion
2015-05-12	Waterbuck	Grevy's zebra	Male	Adult	324.193	17.757	Killed by lion
2015-05-14	Impala	Kiwanja ya Kariunga samani	Female	Adult	325.736	22.219	Killed by lion
2015-05-15	Grevy's zebra	Wilderness	Female	Adult	333.362	26.012	Killed by lion
2015-05-18	Eland	Milima hewa	Male	Unknown	320.7	27.3	Killed by lion
2015-05-20	Plains zebra	Lera ya cardown	Unknown	Sub-Adult	318.982	23.575	Killed by lion
2015-05-21	Waterbuck	Milima faru	Unknown	Unknown	31.2	23.6	Killed by lion
2015-05-22	Eland	Dam ya karionga	Unknown	Sub-Adult	325.433	18.537	Killed by lion
2015-05-25	Plains zebra	Milima mpopongi	Unknown	Adult	322.432	22.878	Killed by lion
2015-05-29	Grevy's zebra	Nyuma ya swamp	Female	Adult	327.853	22.521	Killed by lion
2015-05-31	Eland	Mlango ya kiboo	Male	Adult	323.9	28.2	Killed by lion
2015-06-02	Beisa Oryx	Milima tatu	Male	Adult	328.422	19.02	Killed by lion
2015-06-03	Grevy's zebra	Area ya kahawa	Female	Sub-Adult	324.521	18.822	Killed by lion
2015-06-14	Grevy's zebra	Wilderness	Male	Adult	327.927	22.338	Killed by lion
2015-06-16	Grevy's zebra	Mawe ya simba	Female	Adult	327.927	22.338	Killed by lion
2015-06-20	Plains zebra	Sambara	Unknown	Sub-Adult	330.098	33.098	Killed by lion
2015-06-22	Plains zebra	Sambara	Female	Sub-Adult	330.098	33.098	Killed by cheetah
2015-06-22	Warthog	Sinoni ya ngare niting	Male	Adult	325.979	17.56	Killed by lion
2015-06-23	Eland	Dam ya wambogo	Unknown	Adult	329.877	20.698	Killed by lion
2015-06-27	Plains zebra	Marathon start	Male	Adult	327.855	22.521	Killed by lion
2015-06-27	Plains zebra	Kiwanja ya Kariunga samani	Female	Sub-Adult	325.69	19.815	Killed by lion
2015-06-27	Greater kudu	Milima msungu	Female	Sub-Adult	323.5	30.5	Killed by lion
2015-06-28	Impala	Boma ya faru	Male	Adult	326.096	18.062	Killed by lion
2015-06-28	Impala	Chemichemi ya mike	Female	Adult	328.949	23.192	Killed by leopard
2015-07-02	Grevy's zebra	Boma ya faru	Unknown	foal	325.669	17.739	Killed by lion
2015-07-04	Giraffe	Matekenya	Unknown	Sub-Adult	326.802	21.598	Killed by lion
2015-07-14	Plains zebra	Milima tim	Female	Adult	329.243	27.8	Killed by lion
2015-07-15	Plains zebra	Milima lenjoro	Female	Adult	332.21	24.044	Killed by lion
2015-07-19	Plains zebra	Mlima nderi	Male	Adult	318.788	27.987	Killed by lion
2015-07-22	Grevy's zebra	Dam ya mama	Female	Adult	331.271	22.993	Killed by lion
2015-07-21	Grevy's zebra	Luai ya Ngare ndare	Female	Adult	318.674	20.751	Killed by lion
2015-07-23	Impala	Mardadi	Female	Adult	328.154	22.335	Killed by a leopard
2015-07-24	Plains zebra	Daraja ya wilderness	Female	Sub-Adult	332.378	26.214	Killed by lion
2015-07-25	Giraffe	Mlango ya ndovu	Female	Adult	329.542	30.91	Electrocution
2015-07-25	Eland	Chunvi ya susana	Unknown	Adult	325.828	18.158	Killed by lion
2015-07-26	Giraffe	Matunda	Female	Adult	332.2	19.1	Natural
2015-07-27	Warthog	Matunda	Female	Adult	332.2	19.1	Killed by lion
2015-07-29	Warthog	Matunda	Unknown	Sub-Adult	332.2	19.1	Killed by lion
2015-08-02	Buffalo	Fumbi	Male	Adult	324.869	27.632	Killed by lion
2015-08-06	Grevy's zebra	Milima hewa	Male	Adult	320.7	27.3	Killed by lion
2015-08-07	Ostrich	Mlima lenchoro	Female	Adult	333.2	24.3	Killed by cheetah
2015-08-09	Waterbuck	Karionga	Female	Adult	323.264	18.431	Killed by lion
2015-08-11	Beisa Oryx	Mlima william	Unknown	Sub-Adult	320.348	29.897	Killed by cheetah
2015-08-16	Impala	Laga ya Marania	Unknown	Sub-Adult	332.3	20.2	Killed by lion
2015-08-13	Buffalo	NK Camp	Male	Adult	324.12	28.987	Natural
2015-08-15	Buffalo	Laga ya ndadapoi	Male	Adult	328.025	29.28	Killed by lion
2015-08-24	Impala	Marathon start	Female	Adult	329.058	21.028	Electrocution
2015-08-24	Impala	Marathon start	Female	Adult	329.058	21.028	Electrocution
2015-08-24	Impala	Marathon start	Male	Sub-Adult	329.058	21.028	Electrocution
2015-08-25	Plains zebra	Milima kangauro	Male	Adult	322.9	25.1	Killed by lion
2015-08-29	Impala	Mardadi	Female	Adult	328.581	21.565	Killed by lion
2015-08-31	Plains zebra	Mwarate ya kathiari	Female	Adult	318.502	25.335	Killed by lion
2015-09-01	Grevy's zebra	Matunda	Male	Adult	332.337	18.934	Killed by lion
2015-09-03	Grevy's zebra	Simba ridge	Female	Adult	330.743	22.106	Unknown
2015-09-10	Plains zebra	Laga ya fisi	Female	Adult	327.324	19.363	Killed by lion
2015-09-11	Plains zebra	Kiwanja ya Ian	Female	Adult	329.559	24.576	Killed by lion
2015-09-12	Grevy's zebra	Milima utalii	Unknown	foal	331.4	28.9	Electrocution
2015-09-12	Giraffe	Rugusu	Unknown	Adult	333.2	22.4	Natural
2015-09-15	Grevy's zebra	Boma ya faru	Unknown	Adult	325.805	17.785	Killed by lion
2015-09-15	Impala	Corner safi	Male	Adult	318.155	23.503	Electrocution
2015-09-16	Buffalo	Marathon start	Female	Adult	328.077	22.13	Killed by lion
2015-09-26	Grevy's zebra	Dam ya mama	Male	Adult	328.078	22.134	Killed by lion
2015-09-27	Plains zebra	Manyangallo	Male	Adult	325.06	20.923	Killed by lion
2015-09-28	Plains zebra	Daraja ya Ian	Female	Adult	329.09	23.527	Killed by lion
2015-09-28	Plains zebra	Daraja ya Ian	Female	Sub-Adult	329.09	23.527	Killed by lion
2015-10-01	Warthog	Laga ya Mwangi	Female	Adult	326.832	18.665	Killed by lion
2015-10-02	Impala	Headquarters	Male	Adult	320.5	28.4	Natural
2015-10-03	Grevy's zebra	Matunda	Unknown	foal	332.2	19.1	Killed by lion
9--oct-15	Waterbuck	Wilderness	Female	Adult	333.567	26.754	Killed by lion
2015-10-11	Plains zebra	Milima mbogo	Unknown	Adult	333.2	29.9	Killed by lion
2015-10-13	Plains zebra	Milima utalii	Unknown	Adult	329.146	23.775	Killed by lion
2015-10-18	Plains zebra	Milima sinai	Male	Adult	332.331	26.564	Natural
2015-10-19	Plains zebra	Nyuma ya swamp	Female	Sub-Adult	326.6	21.5	Killed by cheetah
2015-10-22	Impala	Daraja ya Ian	Female	Adult	328.906	23.881	Killed by lion
2015-10-23	Buffalo	Maji ya Bob	Male	Adult	322.657	19.254	Natural
2015-11-01	Plains zebra	Milima choroa	Female	Adult	331.8	26.7	Killed by lion
2015-11-03	Giraffe	Mlango ya ndovu	Female	0-3 calf	330.5	31.3	Killed by cheetah
2015-11-07	Giraffe	Digbys	Unknown	Adult	330.319	24.833	Natural
2015-11-08	Buffalo	Changarawe ya charlie	Unknown	Calf	326.4	18.6	Unknown
2015-11-09	Serval cat	Kiwanja ya ndege	Male	Adult	329.178	21.529	Unknown
2015-11-10	Impala	Lewa gate	Male	Sub-Adult	328.914	20.758	Unknown
2015-11-10	Waterbuck	Kambi ya ndege	Male	Adult	329.276	21.531	Killed by lion
2015-11-15	Giraffe	Boma ya ngamia	Male	Adult	333.832	29.841	Natural
2015-11-18	Impala	nGgiri houuse	Male	Sub-Adult	328.8	22.4	Natural
2015-12-02	Eland	Kangauro	Female	Adult	323.8	25.2	Killed by lion
2015-12-04	Impala	Dam ya wambogo	Female	Adult	329.877	20.698	Killed by Wildog
2015-12-06	Eland	Soboiga	Unknown	Adult	327.942	19.674	Killed by lion
2015-12-09	Buffalo	Ngare niting	Male	Adult	325.475	18.21	Killed by lion
2015-12-13	Giraffe	Dam ya wambogo	Female	Adult	311.839	23.693	Killed by lion
2016-01-04	Impala	Adult	Unknown	Marathon start	328.323	22.897	Killed by leopard
2016-01-09	Grevy's zebra	Sub adult	Female	Bom campsite	326.469	22.05	Natural
2016-01-14	Buffalo	Irmwateni	Male	Adult	320.432	19.987	Killed by lion
2016-01-21	Plains zebra	Adult	Unknown	Lewa safari camp	320.457	27.876	Killed by lion
2016-01-31	Plains zebra	Adult	Female	Chini ya Lewa house	329.596	26.237	Killed by lion
2016-02-05	Grevy's zebra	Adult	Male	Kona ya ndumuku	319.388	26.701	Killed by lion
2016-02-07	Eland	Adult	Male	Kona safi	318.5	24	Killed by lion
2016-02-11	Grevy's zebra	Foal	Unknown	Kangauro	322.9	25.1	Killed by lion
2016-02-13	Eland	Adult	Unknown	Lagha ya HQ	322.5	30.6	Killed by lion
2016-02-20	Buffalo	Adult	Male	Mnanda ya charlie	326.453	19.078	Natural
2016-03-01	Ostrich	Chick	Unknown	Luai ya shamba	319.759	23.348	Unknown
2016-03-01	Plains zebra	Adult	Unknown	Laga ya Mwangi	326.738	18.744	Killed by lion
2016-03-01	Plains zebra	Adult	Unknown	Laga ya Mwangi	326.738	18.744	Killed by lion
2016-03-01	Plains zebra	Adult	Female	Nyuma ya Airstrip	329.31	21.735	Killed by lion
2016-03-01	Eland	Adult	Male	Pigos	319.3	29.4	Electrocution
2016-03-05	Grevy's zebra	Adult	Female	Marathon finishing	328.98	21.95	Killed by lion
2016-03-06	Giraffe	Calf	Unknown	Lera ya cardown	319.996	24.965	Killed by cheetah
2016-03-15	Plains zebra	Sub adult	Male	Fumbi ya chini	324.345	31.449	Killed by lion
2016-03-16	Grevy's zebra	Adult	Female	Nyuma ya swamp	327.814	22.792	Killed by lion
2016-03-22	Buffalo	Adult	Unknown	Luai ya karionga	325.073	18.267	Killed by lion
2016-03-27	Eland	Calf	Unknown	Laga ya west gate	318.369	24.886	Killed by lion
2016-03-29	Grevy's zebra	Adult	Unknown	Marathon start	328.323	22.897	Natural
2016-03-29	Plains zebra	Foal	Unknown	Simba ridge	330.393	22.673	killed by hyena
2016-04-04	Plains zebra	Adult	Male	Milima ngware	320.348	29.897	Killed by lion
2016-04-08	Grant's gazelle	Adult	Female	Dam kubwa	322.2	25.8	Unknown
2016-04-11	Plains zebra	Adult	Female	HQ	320.5	28.4	Killed by lion
2016-04-24	Plains zebra	Adult	Female	Fumbi	326.6	31.5	Killed by lion
2016-04-25	Plains zebra	Adult	Female	Milima william	327.048	25.507	Killed by lion
2016-04-27	Plains zebra	Adult	Female	Langata ya gitonga	325.453	26.897	Killed by lion
2016-04-29	Grevy's zebra	Adult	Unknown	Kisima ya Lewa	322	16	Killed by lion
2016-05-05	Plains zebra	Adult	Unknown	Mlango ya kiboo	323.9	28.2	Killed by lion
2016-05-05	Eland	Adult	Male	Milima loishimi	321.124	23.765	Killed by lion
2016-05-06	Plains zebra	Adult	Male	Kifuko ya Sirkoi	325.987	25.579	Killed by lion
2016-05-08	Plains zebra	Adult	Male	Simba ridge	329.985	22.42	Killed by lion
2016-05-17	Plains zebra	Adult	Male	Milima kangauro	322.047	24.843	Killed by lion
2016-05-22	Giraffe	Adult	Unknown	Kangauro	323.8	25.2	Killed by lion
2016-05-23	Impala	Unknown	Unknown	Marania	330.835	20.017	Unknown
2016-06-01	Plains zebra	Foal	Unknown	Headquarters	320.164	20.643	Killed by lion
2016-06-02	Grevy's zebra	Adult	Female	Luai ya ngarendare	320.905	20.487	Killed by lion
2016-06-02	Impala	Unknown	Female	Milima ian	329063	21.729	Killed by cheetah
2016-06-02	Impala	Unknown	Female	Milima ian	329063	21.729	Killed by cheetah
2016-06-02	Impala	Unknown	Female	Milima ian	329063	21.729	Killed by cheetah
2016-06-04	Impala	Adult	Female	Bosnia	326.802	21.598	Killed by cheetah
2016-06-05	Grant's gazelle	Adult	Female	mlima mpopongi	322.432	22.878	Killed by cheetah
2016-06-05	Buffalo	Adult	Female	Boma inne	319.393	27.415	Killed by lion
2016-06-06	Giraffe	young	Unknown	Dam kubwa area	322.267	25.208	Killed by lion
2016-06-07	Plains zebra	Adult	Female	Milima faru	31.2	23.6	Killed by lion
2016-06-08	Grevy's zebra	Adult	Female	Nyuma ya swamp	327.814	22.792	Killed by lion
2016-06-09	Plains zebra	Sub adult	Female	Parking ya willyrobert	322.757	26.221	Killed by lion
2016-06-10	Plains zebra	Adult	Female	Marathon start	328.115	22.289	Killed by lion
2016-06-11	Buffalo	Adult	Male	Laga ya mpopongi	326.068	19.969	Killed by lion
2016-06-13	Giraffe	Adult	Female	Kangauro	323.743	26.784	Killed by lion
2016-06-14	Plains zebra	Adult	Male	Kangauro	323.762	26.163	Killed by lion
2016-06-15	Grevy's zebra	Foal	Unknown	Nyuma ya swamp	328.115	22.289	Killed by cheetah
2016-06-16	Grevy's zebra	Adult	Male	Luai ya mike	328.896	22.734	Killed by lion
2016-06-20	Beisa Oryx	Adult	Female	Luai ya shamba	319.759	23.348	Natural
2016-06-25	Grevy's zebra	Adult	Male	Nyuma ya swamp	327.771	22.829	Killed by lion
2016-06-26	Buffalo	Adult	Female	Miti ya Susana	323.075	18.928	Killed by lion
2016-06-28	Plains zebra	Foal	Unknown	Milima sagana	326.993	27.379	Killed by lion
2016-07-01	Plains zebra	Adult	Female	Sagana ya chini	326.163	29.268	Killed by lion
2016-07-02	Grant's gazelle	Adult	Female	Bom campsite	326.469	22.05	Killed by cheetah
2016-07-03	Impala	Adult	Unknown	Wilderness	333.567	26.754	Electrocution
2016-07-03	Plains zebra	Adult	Female	Marura	324.198	28.044	Killed by lion
2016-07-04	Plains zebra	Adult	Female	Ndadapoi	327.448	28.601	Killed by lion
2016-07-07	Impala	Adult	Female	Matunda	332.2	19.1	Killed by cheetah
2016-07-08	Impala	Adult	Male	Wilderness	333.567	26.754	Killed by leopard
2016-07-13	Impala	Adult	Male	Old matunda road	332.2	19.1	Natural
2016-07-15	Plains zebra	Adult	Female	Morial beacon	328.436	28.791	Killed by lion
2016-07-19	Impala	Adult	Female	Mogumo	330.4	24.6	Killed by cheetah
2016-07-20	Impala	Adult	Male	Wilderness	333.567	26.754	Killed by cheetah
2016-07-21	Impala	Adult	Female	Daraja ya Ian	328.906	23.881	Killed by cheetah
2016-07-22	Impala	Adult	Male	Nyuma ya swamp	326.6	21.5	Killed by wilddog
2016-07-24	Eland	Adult	Male	Kiboo	325.091	25.894	Killed by lion
2016-07-25	Giraffe	Adult	Male	Junction tano	329.648	25.161	Natural
2016-07-25	Waterbuck	Adult	Male	Headquarters	328.715	21.998	Killed by lion
2016-07-25	Plains zebra	Adult	Male	Airstrip	329.31	21.735	Killed by lion
2016-08-01	Plains zebra	Sub-Adult	Unknown	Milima njora	319.4	20.5	Killed by lion
2016-08-02	Buffalo	Adult	Male	Marura	323.746	29.211	Killed by lion
2016-08-04	Grevy's zebra	Foal	Unknown	Milima william	327.048	25.507	Killed by cheetah
2016-08-05	Plains zebra	Adult	Male	Laga ya Headquarters	322.5	30.6	Killed by lion
2016-08-05	Grevy's zebra	Foal	Female	Laga ya mwangi	326.567	19.751	Killed by cheetah
2016-08-07	Buffalo	Adult	Female	Mnanda ya charlie	326.501	18.424	Killed by lion
2016-08-09	Grant's gazelle	Adult	Female	Milima lenjoro	333.2	24.3	Killed by leopard
2016-08-09	Impala	Adult	Female	Wilderness	333.567	26.754	Killed by cheetah
2016-08-11	Plains zebra	Sub adult	Female	Daraja ya wilderness	326.8	26	Killed by lion
2016-08-13	Giraffe	Adult	Male	Milima Mwitia	324.8	32.432	Killed by lion
2016-08-15	Grant's gazelle	Adult	Male	Matekenya	326.802	21.598	Killed by cheetah
2016-08-18	Impala	Adult	Female	Matekenya	326.802	21.598	Killed by wilddog
2016-08-21	Eland	Sub adult	Unknown	Chunvi ya kangauro	323.853	25.594	Killed by lion
2016-08-21	Grevy's zebra	Adult	Female	Dam ya Mwangi	326.567	19.751	Natural
2016-08-23	Hartebeest	Unknown	Unknown	Ngurunga	330.742	25.082	Killed by cheetah
2016-08-24	Plains zebra	Adult	Female	Sagana ya chini	326.606	28.245	Killed by lion
2016-08-30	Impala	Adult	Female	Kahawa	324.445	18.702	Natural
2016-08-30	Impala	Adult	Female	Kahawa	324.445	18.702	Natural
2016-08-31	Grevy's zebra	Adult	Female	Makutikuti	328.472	27.693	Natural
2016-08-31	Giraffe	Sub adult	Male	Milima ian	328.961	24.116	Killed by lion
2016-09-05	Plains zebra	Adult	Male	Ndikir ya shabaa	321.942	30.451	Killed by lion
2016-09-07	Giraffe	Sub adult	Female	Nyuma ya swamp	328.245	23.893	Killed by lion
2016-09-06	Eland	Adult	Unknown	Kisima ya Leparua	326.3	30.5	Unknown
2016-09-08	Buffalo	Adult	Male	Maji ya Bob	323.301	19.143	Killed by lion
2016-09-08	Buffalo	Calf	Unknown	Ngare niting	326.309	17.723	Unknown
2016-09-08	Plains zebra	Foal	Unknown	Milima lenjoro	332.148	24.044	Killed by cheetah
2016-09-09	Impala	Adult	Male	Njoora	321.885	19.754	Unknown
2016-09-09	Grevy's zebra	Adult	Female	Bom campsite	326.609	22.401	Unknown
2016-09-10	Buffalo	Adult	Male	Corner ya manyangalo	324.389	19.626	Unknown
2016-09-10	Plains zebra	Sub adult	Unknown	Kangauro	322.658	26.299	Killed by cheetah
2016-09-12	Grevy's zebra	Sub adult	Unknown	Bom campsite	326.713	21.883	Killed by lion
2016-09-12	Buffalo	Adult	Female	Chemichemi	329.128	23.365	Unknown
2016-09-13	Buffalo	Adult	Male	Luai ya ngarendare	321.186	19.513	Killed by lion
2016-09-16	Plains zebra	Adult	Male	Kangauro	322.716	26.226	Killed by lion
2016-09-17	Giraffe	Adult	Male	Laga ya Marania	331.57	19.542	Natural
2016-09-21	Plains zebra	Adult	Male	milima mkora	322.398	28.502	Killed by lion
2016-09-27	Plains zebra	Adult	Male	Chunvi ya kangauro	323.853	25.594	Killed by lion
2016-10-01	Plains zebra	Sub adult	Female	Lewa safari camp	320.901	27.252	Killed by lion
2016-10-03	Buffalo	Sub adult	Female	Nyuma ya swamp	327.952	22.399	Killed by lion
2016-10-06	Eland	Adult	Female	Willyrobert	325.154	23.152	Natural
2016-10-09	Buffalo	young	Unknown	Mnanda ya charlie	326.453	19.078	Unknown
2016-10-10	Grevy's zebra	Foal	Unknown	Behind swamp	328.008	22.787	Natural
2016-10-12	Impala	Adult	Female	Wilderness	332.862	25.993	Killed by wilddog
2016-10-19	Waterbuck	Adult	Female	HQ	328.838	22.529	Killed by lion
2016-10-19	Plains zebra	Foal	Unknown	Meza	320.889	29.337	Killed by lion
2016-10-21	Buffalo	Adult	Male	Njoora	321.191	19.514	Natural
2016-10-21	Giraffe	Adult	Female	Irmwateni	320.956	19.488	Killed by lion
2016-10-25	Giraffe	Adult	Female	Dam ya mama	331.592	22.812	Killed by lion
2016-10-25	Giraffe	young	Unknown	Dam ya mama	331.592	22.812	Killed by lion
2016-10-25	Grevy's zebra	Adult	Male	Swamp	327.871	22.649	Killed by lion
2016-10-28	Waterbuck	Adult	Unknown	Digbys	330.527	24.081	Killed by lion
2016-10-29	Impala	Sub adult	Unknown	Dam ya mama	331.163	22.492	Killed by cheetah
2016-10-29	Grevy's zebra	Adult	Female	Mawe ya leparua	328.119	30.564	Killed by lion
2016-10-29	Grevy's zebra	Foal	Unknown	Mawe ya leparua	328.119	30.564	Killed by lion
2016-10-29	Warthog	Adult	Female	Wilderness	331.101	24.846	Killed by lion
2016-10-29	Buffalo	Calf	Unknown	Bosnia	327.873	21.733	Natural
2016-10-29	Impala	Adult	Male	Mlima sinai	321.846	19.39	Unknown
2016-10-30	Beisa Oryx	Adult	Male	Soboiga	327.705	18.828	Killed by lion
2016-11-05	Eland	Adult	Male	Chemichemi ya mike	329.247	23.184	Killed by lion
2016-11-05	Plains zebra	Foal	Unknown	Fumbi plains	324.728	30.701	Killed by lion
2016-11-06	Plains zebra	Foal	Female	Matekenya	326.572	23.536	Killed by cheetah
2016-11-06	Impala	Adult	Male	Laga ya fisi	327.458	20.198	Killed by cheetah
2016-11-06	Impala	Adult	Female	Laga ya fisi	327.458	20.198	Killed by cheetah
2016-11-07	Buffalo	Adult	Female	Irmwateni	320.468	19.102	Killed by lion
2016-11-09	Waterbuck	Adult	Female	Kisima ya lewa	328.485	21.048	Unknown
2016-11-10	Plains zebra	Adult	Male	Luai ya charlie	320.375	20.014	Killed by lion
2016-11-10	Plains zebra	Adult	Female	Irmwateni	320.818	19.293	Killed by lion
2016-11-11	Waterbuck	Adult	Male	Digbys	330.66	24.486	Killed by lion
2016-11-13	Buffalo	Adult	Male	Batians house	325.568	17.839	Killed by lion
2016-11-16	Plains zebra	Adult	Unknown	Morani	322.911	30.307	Killed by lion
2016-11-17	Plains zebra	Adult	Unknown	Mlango ya ndovu	329.216	31.245	Killed by lion
2016-11-19	Giraffe	Adult	Unknown	Laga ya sambara	330.098	330.098	Unknown
2016-11-20	Plains zebra	Foal	Unknown	Mlango ya kiboo	324.308	25.889	Killed by cheetah
2016-11-20	Beisa Oryx	Adult	Female	Area ya mawingu	318.643	26.889	Electrocution
2016-11-23	Buffalo	Adult	Male	Nyuma ya swamp	327.952	22.399	Natural
2016-11-23	Buffalo	Adult	Male	Nyuma ya swamp	327.952	22.399	Natural
2016-11-24	Buffalo	Adult	Female	Matunda	331.2	20.253	Natural
2016-11-24	Buffalo	Calf	Female	Matunda	331.383	19.761	Natural
2016-11-24	Giraffe	Adult	Female	Fumbi	324.484	32.39	Killed by lion
2016-11-24	Plains zebra	Adult	Male	Milima Mwitia	324.55	32.082	Killed by lion
2016-12-02	Giraffe	Adult	Male	Milima simba	328.412	28.993	Killed by lion
2016-12-03	Buffalo	Adult	Female	Kangauro	322.248	25.779	Killed by lion
2016-12-04	Grevy's zebra	Adult	Male	Milima tatu	328.009	18.592	Killed by lion
2016-12-06	Buffalo	Adult	Male	Luai ya sambara	329.219	30.433	Killed by lion
2016-12-06	Buffalo	Adult	Male	Morial camp	328.154	27.851	Killed by lion
2016-12-06	Plains zebra	Sub adult	Female	Daraja ya wilderness	332.258	25.993	Killed by lion
2016-12-09	Buffalo	Adult	Female	Nyuma ya swamp	328.383	23.756	Killed by lion
2016-12-15	Buffalo	Adult	Female	Laga ya fisi	327.458	20.198	Killed by lion
2016-12-27	Beisa Oryx	Adult	Female	Laga ya fisi	327.894	20.005	Killed by lion
2016-12-27	Grevy's zebra	Adult	Female	Laga ya fisi	328.078	19.601	Killed by lion
2016-12-31	Plains zebra	Adult	Female	Laga ya fisi	327.458	20.198	Killed by lion
2017-01-04	Eland	Adult	Female	Kangauro	322.771	25.463	Killed by lion
2017-01-06	Plains zebra	Sub adult	Unknown	Digbys	330.103	25.765	Killed by lion
2017-01-14	Plains zebra	Adult	Female	Annamerz	324.889	27.797	Killed by lion
2017-01-16	Grant's gazelle	Sub adult	Unknown	Fumbi ya chini	328.855	21.812	Killed by cheetah
2017-01-16	Plains zebra	Adult	Male	Corner safi	318.576	25.366	Killed by lion
2017-01-18	Plains zebra	Adult	Female	Sagana ya chini	326.241	28.586	Killed by lion
2017-01-21	Plains zebra	Adult	Female	Milima njora	322.751	22.519	Unknown
2017-01-21	Eland	Adult	Female	Milima ngware	322.764	30.708	Killed by lion
2017-01-24	Impala	Adult	Male	HQ	328.311	22.448	Killed by lion
2017-01-28	Eland	Adult	Female	kangauro	323.672	26.161	Killed by lion
2017-02-02	Grevy's zebra	Adult	Male	Laga ya Lekerio	322.619	25.297	Killed by lion
2017-02-04	Warthog	Adult	Male	Bom campsite	327.438	24.372	Killed by lion
2017-02-05	Buffalo	Adult	Female	Mawingu	318.333	28.061	Killed by lion
2017-02-05	Plains zebra	Adult	Male	Lopoko	328.9	28.2	Killed by lion
2017-02-07	Grevy's zebra	Adult	Male	Milima makutikuti	328.496	26.939	Killed by lion
2017-02-11	Plains zebra	Foal	Unknown	Fumbi ya chini	326.988	29.948	Unknown
2017-02-13	Grevy's zebra	Adult	Male	Morani	323.482	30.072	Killed by lion
2017-02-18	Buffalo	Calf	Male	Lopoko	328.9	28.2	Unknown
2017-02-19	Warthog	Sub adult	Unknown	Njoora	321.8	19.8	Killed by lion
2017-02-20	Impala	Adult	Male	Isiolo valley	331.258	27.764	Wild dog
2017-02-22	Wild dog	Adult	Female	Ngare Ndare Forest	315.026	18.73	Unknown
2017-02-23	Giraffe	Adult	Female	Milima kingi	328.334	30.977	Killed by lion
2017-02-23	Giraffe	Young	Unknown	Milima kingi	328.334	30.977	Killed by lion
2017-02-24	Waterbuck	Adult	Male	Simba ridge	330.31	23.136	Killed by lion
2017-02-25	Plains zebra	Adult	Male	Boma ya mungu	325.926	26.41	Killed by lion
2017-03-01	Giraffe	Young	Unknown	Mlango ya ndovu	329.579	31.344	Killed by lion
2017-03-03	Giraffe	Young	Unknown	Milima kingi	329.607	31.063	Killed by lion
2017-03-06	Buffalo	Adult	Unknown	Kifuko ya njari	329.645	24.062	Unknown
2017-03-09	Impala	Adult	Male	Sanje mbaya	334.231	25.629	Killed by lion
2017-03-14	Eland	Calf	Unknown	Makutikuti	328.414	26.442	Killed by cheetah
2017-03-18	Giraffe	Sub adult	Unknown	Milima utalii	332.204	29.347	Killed by lion
2017-03-20	Buffalo	Calf	Unknown	corner ya manyangalo	324.513	19.755	Unknown
2017-03-21	Plains zebra	Adult	Female	Njoora	321.124	19.213	Unknown
2017-03-22	Plains zebra	Adult	Female	Kangauro	323.204	25.819	Killed by lion
2017-03-27	Grevy's zebra	Adult	Female	Isiolo valley	331.355	27.798	Electrocution
2017-04-04	Plains zebra	Adult	Female	Ukuta ya mlima mbogo	332.027	27.447	Killed by lion
2017-04-11	Buffalo	Adult	Female	Ndikir ya shabaa	332.294	27.228	Killed by lion
2017-04-13	Plains zebra	Adult	Unknown	Dam ya fumbi	324.848	29.455	Killed by lion
2017-04-14	Impala	Adult	Male	Luai ya shali	319.279	19.903	Killed by lion
2017-04-17	Plains zebra	Adult	Female	Matunda	331.622	21.426	Unknown
2017-04-17	Hyena	Adult	Unknown	Fumbi ya juu	324.913	29.25	Killed by lion
2017-04-18	Grevy's zebra	Adult	Male	Leparua	329.143	33.048	Killed by lion
2017-04-22	Impala	Sub adult	Unknown	Daraja ya Ian	329.143	23.861	Killed by lion
2017-04-22	Grevy's zebra	Adult	Female	Junction tano	329.83	25.532	Killed by lion
2017-04-23	Buffalo	Adult	Male	Alanroot	323.278	21.714	Killed by lion
2017-04-24	Plains zebra	Sub adult	Unknown	Milima william	327.022	26.07	Killed by cheetah
2017-04-25	Grevy's zebra	Adult	Female	Matekenya	327.273	23.047	Killed by lion
2017-04-28	Plains zebra	Sub adult	Unknown	Milima kali	335.189	26.37	Killed by lion
2017-05-02	Plains zebra	Adult	Unknown	Milima sambara	330.745	28.102	Killed by lion
2017-05-02	Giraffe	Calf	Unknown	Matunda	332.146	19.099	Unknown
2017-05-02	Plains zebra	Adult	Female	Mbogani ya milima mbogo	333.533	29.273	Killed by lion
2017-05-03	Giraffe	Adult	Male	Headquarter	328.687	22.36	old age
2017-05-03	Plains zebra	Sub adult	Female	Lewa house	329.431	26.267	Killed by lion
2017-05-11	Beisa Oryx	Adult	Female	Kangauro	323.688	26.191	Killed by lion
2017-05-15	Buffalo	Adult	Female	Digbys	330.391	23.792	Killed by lion
2017-05-18	Plains zebra	Adult	Female	Mtego ya twiga	327.042	18.975	Killed by lion
2017-05-19	Buffalo	Adult	Female	Kisima ya Leparua	329.955	30.484	Killed by lion
2017-06-01	Warthog	Adult	Unknown	Kiwanja ya samani	322.12	18.461	Killed by lion
2017-06-01	Plains zebra	Adult	Male	Kangauro	322.93	27.527	Killed by lion
2017-06-03	Buffalo	Adult	Male	Borana	317.342	24.62	Killed by lion
2017-06-05	Plains zebra	Adult	Female	Corner safi	317.192	24.62	Killed by lion
2017-06-06	Eland	Adult	Female	Dam kubwa	321.782	26.922	Killed by lion
2017-06-07	Waterbuck	Adult	Female	Ngare niting	325.374	17.639	Killed by lion
2017-06-10	Grevy's zebra	Sub adult	Unknown	Laga ya sambara	329.674	28.339	Killed by lion
2017-06-11	Plains zebra	Adult	Male	Milima simba	329.173	28.575	Killed by lion
2017-06-17	Eland	Adult	Female	Luai ya chali	318.868	19.886	Killed by lion
2017-06-18	Impala	Adult	Female	Shangarawe ya chali	318.604	20.614	Killed by leopard
2017-06-19	Plains zebra	Adult	Unknown	Luai nyekundu	319.573	25.201	Killed by lion
2017-06-20	Ostrich	Adult	Male	Mwarate mkora	322.829	27.581	Killed by leopard
2017-06-26	Buffalo	Adult	Male	Marti one	326.885	14.668	Killed by lion
2017-06-30	Plains zebra	Adult	Male	Chunvi ya kangauro	322.342	22.591	Killed by lion
2017-07-02	Plains zebra	Adult	Female	Laga ya sambara	329.19	28.98	Killed by lion
2017-07-04	Buffalo	Adult	Female	Boma ya faru	332.72	26.772	Killed by lion
2017-07-04	Plains zebra	Adult	Unknown	Milima simba	328.258	29.858	Killed by lion
2017-07-10	Giraffe	Adult	Female	Ilnwesi conservation	317.051	38.475	Killed by chalisa
2017-07-11	Plains zebra	Adult	Female	Soboiga	328.335	19.407	Killed by lion
2017-07-12	Jackal	Adult	Unknown	Lewa safari camp	320.261	28.006	Killed by lion
2017-07-12	Waterbuck	Young	Unknown	HQ	328.002	22.691	Unknown
2017-07-14	Giraffe	Adult	Female	Laga ngumu ya mwitia	325.502	31.282	Killed by lion
2017-07-17	Grevy's zebra	Adult	Male	kisima ya lewa	328.641	21.019	Killed by lion
2017-07-18	Grevy's zebra	Adult	Male	Meza	322.283	31.178	Killed by lion
2017-07-14	Waterbuck	Adult	Female	HQ	328.003	22.544	Killed by lion
2017-07-19	Eland	Adult	Female	Manyangalo	323.427	20.128	Electrocution
2017-07-19	Impala	Adult	Female	Karionga	325.055	19.865	Killed by cheetah
2017-07-20	Grevy's zebra	Foal	Female	Nyuma ya swamp	327.864	23.2	Killed by cheetah
2017-07-23	Plains zebra	Adult	Female	Ilnwesi conservation	316.532	37.439	Killed by lion
2017-07-23	Plains zebra	Adult	Female	Nkapune ya lekenjae	325223	31.741	Killed by lion
2017-07-23	Plains zebra	lion predation	Chalisa	Ilnwesi conservation	316.532	37.439	Killed by lion
2017-07-25	Giraffe	Young	Unknown	Kifuko ya farasi	332.226	25.473	Killed by lion
2017-07-29	Plains zebra	Adult	Female	Fumbi	326.39	29.645	Killed by lion
2017-08-01	Buffalo	Adult	Male	Susana rouse	324.209	18.084	Killed by lion
2017-08-04	Plains zebra	Adult	Female	Digbys	330.047	23.856	Killed by lion
2017-08-06	Plains zebra	Adult	Female	Chemichemi ya mike	329.723	23.619	Killed by lion
2017-08-09	Plains zebra	Sub adult	Female	corner ya manyangalo	324.341	19.734	Killed by lion
2017-08-10	Warthog	Adult	Female	Daraja ya Ian	329.402	23.668	Killed by lion
2017-08-12	Warthog	Adult	Male	Bom campsite	326.923	22.361	Killed by lion
2017-08-13	Plains zebra	Adult	Female	Sagana ya chini	323.395	30.498	Killed by lion
2017-08-16	Plains zebra	Adult	Male	Meza	318.628	32.542	Killed by lion
2017-08-18	Plains zebra	Adult	Female	Digbys	329.674	23.646	Killed by lion
2017-08-21	Plains zebra	Sub adult	Female	Lera ya cardown	318.628	23.616	Killed by lion
2017-08-23	Eland	Adult	Female	Dam kubwa	321.615	25.871	Killed by lion
2017-08-26	Plains zebra	Adult	Female	Corner ya ndomoko	321.798	22.834	Killed by lion
2017-08-26	Plains zebra	Foal	Female	Corner ya ndomoko	321.798	22.834	Killed by lion
2017-08-26	Plains zebra	Adult	Female	Dam ya charlie	322.759	20.194	Killed by lion
2017-08-27	Plains zebra	Adult	Female	Nkapune ya lekenjae	321.806	29.309	Killed by lion
2017-08-30	Impala	Adult	Female	mbogani ya sirkoi	324.297	24.905	Killed by cheetah
2017-08-31	Plains zebra	Adult	Male	Kisima ya lewa	327.986	20.513	Killed by lion
2017-09-01	Waterbuck	Adult	Male	Ndikir ya shabaa	321.651	30.411	Killed by lion
2017-09-02	Plains zebra	Adult	Male	Ndikir ya milima simba	328.234	28.409	Killed by lion
2017-09-04	Plains zebra	Adult	Female	Airstrip	330.596	22.37	Killed by lion
2017-09-07	Plains zebra	Sub adult	Male	Simba ridge	330.461	22.674	Unknown
2017-09-07	Plains zebra	Sub adult	Male	Airstrip	330.596	22.37	Unknown
2017-09-08	Grevy's zebra	Sub adult	Unknown	Simba ridge	330.84	21.733	Killed by lion
2017-09-09	Plains zebra	Adult	Male	Karionga	325.44	18.601	Killed by lion
2017-09-17	Giraffe	Adult	Female	Mombasa	323.669	31.35	Killed by lion
2017-09-17	Giraffe	Adult	Female	Mombasa	323.621	31.359	Killed by lion
2017-09-18	Buffalo	Adult	Male	Kisima ya jakwai	328.987	28.376	Killed by lion
2017-09-19	Waterbuck	Adult	Male	Kifuko ya njari	329.913	24.344	Killed by lion
2017-09-20	Buffalo	Calf	Male	Simba ridge	330.558	22.199	Unknown
2017-09-21	Buffalo	Calf	Unknown	Dam ya charlie	322.134	20.193	Killed by lion
2017-09-24	Warthog	Adult	Male	Nyuma ya swamp	322.5	327.817	Killed by lion
2017-09-24	Plains zebra	Adult	Female	Digbys	330.659	24.595	Killed by lion
2017-09-24	Plains zebra	Foal	Unknown	Digbys	330.659	24.595	Killed by lion
2017-10-04	Grevy's zebra	Adult	Male	Mardadi	327.881	21.905	Killed by lion
2017-10-05	Beisa Oryx	Adult	Female	Milima mzungu	324.248	29.153	Killed by lion
2017-10-09	Buffalo	Adult	Male	murani	323.563	30.099	Killed by lion
2017-10-10	Plains zebra	Adult	Male	Makutikuti	328.199	27.186	Killed by lion
2017-10-11	Ostrich	Adult	Female	murani	322.664	29.779	Killed by lion
2017-10-15	Buffalo	Adult	Female	Borana	304.652	27.434	Killed by lion
2017-10-16	Buffalo	Adult	Female	Borana	304.825	29.564	Killed by lion
2017-10-18	Buffalo	Adult	Female	Isiolo valley	332.013	28.187	Killed by lion
2017-10-19	Buffalo	Adult	Female	Borana	309.72	31.068	Killed by lion
2017-10-23	Eland	Adult	Unknown	Mtego ya twiga	326.717	18.978	Unknown
